# Supplementary material for: Machine learning identifies novel coagulation genes as diagnostic and immunological biomarkers in ischemic stroke
Source: Aging (Albany NY). 2024 Apr 3;16(7):6314–33. doi: 10.18632/aging.205706 (PMC11042924; doi:10.18632/aging.205706)
Supplement: Supplementary Table 1 [file aging-16-205706-s002.xlsx]

## Sheet: Supplementary Table 3  immune_s
Supplementary Table 1. The proportions of immune cells calculated by ssGSEA in ischemic stroke and control samples.
id	X3100083_Stroke	X3100191_Stroke	X3100068_Stroke	X3100060_Stroke	X3100138_Stroke	X3100135_Stroke	X3100195_Stroke	X3100058_Stroke	X3100025_Stroke	X3100112_Stroke	X3100039_Stroke	X3100124_Stroke	X3100113_Stroke	X3100031_Stroke	X3100157_Stroke	X3100023_Stroke	X3100114_Stroke	X3100066_Stroke	X3100076_Stroke	X3100118_Stroke	X3100048_Stroke	X3100137_Stroke	X3100042_Stroke	X3100034_Stroke	X3100193_Stroke	X3100077_Stroke	X3100197_Stroke	X3100041_Stroke	X3100036_Stroke	X3100050_Stroke	X3100121_Stroke	X3100061_Stroke	X3100035_Stroke	X3100117_Stroke	X3100126_Stroke	X3100047_Stroke	X3100044_Stroke	X3100084_Stroke	X3100021_Stroke	X212413_Control	X212414_Control	X212416_Control	X212404_Control	X213403_Control	X212417_Control	X213405_Control	X213906_Control	X212415_Control	X213302_Control
aDC	0.56839	0.174612	0.373256	0.393199	0.526762	0.565971	0.473795	0.401548	0.492084	0.398333	0.322267	0.337494	0.374976	0.497655	0.41625	0.296024	0.464497	0.426709	0.425048	0.466189	0.306829	0.578837	0.347307	0.364003	0.459277	0.479287	0.424324	0.432866	0.505516	0.455681	0.321096	0.450903	0.334568	0.609138	0.546882	0.449117	0.381545	0.464582	0.302547	0.578234	0.419652	0.506593	0.339511	0.462501	0.458874	0.58166	0.392822	0.480065	0.354407
B cells	0.634104	0.493654	0.612761	0.529987	0.589765	0.61868	0.552182	0.526999	0.647829	0.611609	0.586452	0.509101	0.600941	0.529209	0.574322	0.60182	0.551156	0.538305	0.60458	0.654367	0.46162	0.691913	0.568416	0.543515	0.720249	0.647556	0.455093	0.60299	0.55603	0.586302	0.476828	0.53902	0.598283	0.506294	0.537896	0.583522	0.540229	0.645622	0.468045	0.582987	0.571042	0.643581	0.545086	0.673893	0.591248	0.649086	0.666065	0.711231	0.59084
CD8 T cells	0.811618	0.801975	0.794034	0.798409	0.795677	0.804361	0.818803	0.781952	0.828897	0.806403	0.773875	0.779408	0.80253	0.810563	0.802749	0.818485	0.835995	0.817905	0.815058	0.814566	0.808391	0.855802	0.807549	0.812233	0.848097	0.815174	0.815868	0.826442	0.834135	0.817734	0.778871	0.805809	0.807073	0.803574	0.801621	0.804274	0.801597	0.826453	0.797049	0.80556	0.852229	0.842871	0.807941	0.824985	0.817145	0.824955	0.843072	0.828217	0.813439
Cytotoxic cells	0.876891	0.823219	0.824443	0.81785	0.836113	0.853733	0.824454	0.820371	0.870695	0.849812	0.79225	0.776406	0.866358	0.848386	0.848484	0.838132	0.892439	0.86625	0.818488	0.823439	0.858547	0.870822	0.824857	0.818496	0.849726	0.784015	0.884903	0.848152	0.863208	0.866076	0.835365	0.857936	0.857297	0.864706	0.852699	0.844836	0.809197	0.873434	0.828938	0.846618	0.896499	0.874018	0.855146	0.877095	0.876591	0.866502	0.876766	0.87594	0.834896
DC	0.458791	0.45394	0.485645	0.48746	0.46097	0.472911	0.451445	0.481026	0.455759	0.499958	0.43626	0.492665	0.499485	0.409956	0.46147	0.454251	0.405091	0.442216	0.424281	0.48509	0.45081	0.461688	0.520317	0.484857	0.390831	0.466261	0.509478	0.397186	0.459185	0.450549	0.450212	0.487283	0.39531	0.40347	0.426591	0.466004	0.43472	0.45467	0.498182	0.507351	0.41402	0.433543	0.458587	0.443512	0.429692	0.468786	0.409095	0.42363	0.4062
Eosinophils	0.718467	0.748331	0.77384	0.74185	0.781075	0.738539	0.756576	0.703644	0.723453	0.74877	0.751915	0.755888	0.707771	0.776765	0.734004	0.727809	0.739297	0.755557	0.747731	0.753175	0.719261	0.714579	0.763061	0.739426	0.729814	0.749874	0.755539	0.720086	0.75845	0.764068	0.737145	0.746544	0.740721	0.720393	0.729872	0.775454	0.735695	0.757969	0.74457	0.749928	0.737727	0.737097	0.746458	0.745378	0.759126	0.740217	0.735861	0.707488	0.762106
iDC	0.63718	0.586939	0.648076	0.582942	0.613523	0.621123	0.628213	0.577581	0.614601	0.595833	0.63953	0.645575	0.618796	0.602896	0.577917	0.577557	0.580977	0.569685	0.628548	0.643461	0.665621	0.604377	0.586225	0.634629	0.623153	0.629491	0.574676	0.614208	0.56225	0.58388	0.650898	0.626211	0.617956	0.622776	0.651949	0.592506	0.552828	0.608889	0.655777	0.623433	0.621904	0.620578	0.620941	0.609671	0.581286	0.615972	0.601065	0.630709	0.582593
Macrophages	0.531299	0.492325	0.5416	0.498096	0.520458	0.57447	0.545347	0.559661	0.523734	0.525604	0.582844	0.654707	0.547153	0.527044	0.518492	0.498	0.549307	0.515322	0.519782	0.516834	0.577751	0.515919	0.515178	0.514409	0.539088	0.525641	0.519293	0.551002	0.502026	0.536396	0.558847	0.561641	0.563934	0.561713	0.618729	0.543025	0.546088	0.558159	0.580999	0.522673	0.523791	0.510964	0.510826	0.500648	0.517797	0.506696	0.481834	0.516378	0.512871
Mast cells	0.573145	0.638973	0.590156	0.521248	0.551012	0.546986	0.516757	0.490104	0.46497	0.526801	0.593573	0.526716	0.495904	0.551314	0.521869	0.510278	0.476121	0.425709	0.452177	0.511377	0.635184	0.428931	0.524463	0.481431	0.497302	0.580525	0.571849	0.495469	0.412176	0.569853	0.610514	0.485138	0.55417	0.503908	0.554971	0.531943	0.574871	0.574195	0.647035	0.540343	0.557125	0.501173	0.522648	0.529181	0.5242	0.452281	0.468962	0.461323	0.429254
Neutrophils	0.935014	0.956577	0.955148	0.974497	0.949815	0.910989	0.93404	1	0.912834	0.934923	0.96121	0.97757	0.922555	0.969213	0.921144	0.943363	0.930101	0.934981	0.943298	0.93354	0.899843	0.911103	0.960127	0.972917	0.901342	0.959813	0.982213	0.965564	0.93513	0.947396	0.985221	0.9587	0.971015	0.958788	0.946888	0.9567	0.986924	0.941885	0.903141	0.909234	0.916271	0.904869	0.919543	0.902934	0.905268	0.887665	0.857542	0.908995	0.935552
NK CD56bright cells	0.387842	0.505789	0.411868	0.406586	0.39048	0.368086	0.454393	0.400119	0.43314	0.436738	0.435395	0.356267	0.421637	0.447969	0.397366	0.422326	0.384622	0.419704	0.356888	0.43524	0.458592	0.408686	0.449415	0.421087	0.389407	0.407854	0.46033	0.349425	0.424254	0.386612	0.417711	0.368363	0.435856	0.450365	0.368755	0.403857	0.40386	0.422283	0.432054	0.446113	0.436536	0.426956	0.478634	0.40868	0.407108	0.375929	0.34822	0.418999	0.395449
NK CD56dim cells	0.771147	0.74355	0.744337	0.707641	0.708177	0.748661	0.754117	0.668618	0.76656	0.688212	0.751728	0.68604	0.729835	0.805897	0.682949	0.757632	0.805614	0.749405	0.632337	0.752013	0.662758	0.740046	0.705274	0.71868	0.702877	0.614119	0.839184	0.767048	0.749505	0.711076	0.726789	0.76688	0.764878	0.824576	0.735994	0.731376	0.704281	0.789154	0.603108	0.832438	0.870228	0.731234	0.762286	0.754986	0.821315	0.71407	0.807975	0.822293	0.693513
NK cells	0.457288	0.474269	0.410329	0.4763	0.441181	0.447989	0.458431	0.484189	0.482493	0.47689	0.478612	0.461282	0.470063	0.47066	0.471495	0.453587	0.459828	0.457235	0.451183	0.447952	0.447166	0.464065	0.427179	0.457021	0.476464	0.478303	0.491895	0.429117	0.462509	0.477641	0.508354	0.456919	0.460614	0.471557	0.437961	0.482647	0.443633	0.488616	0.439677	0.511582	0.515887	0.44178	0.445357	0.444672	0.454047	0.447652	0.453373	0.458178	0.442922
pDC	0.63352	0.794263	0.638923	0.661825	0.656483	0.673491	0.640335	0.649606	0.547131	0.540929	0.644203	0.632906	0.63837	0.689639	0.59889	0.591338	0.579181	0.624985	0.291156	0.625783	0.648378	0.504581	0.609144	0.741092	0.569787	0.588821	0.62695	0.589251	0.674842	0.673307	0.462522	0.604109	0.540131	0.744162	0.604846	0.636651	0.549034	0.676929	0.639905	0.691788	0.64801	0.570401	0.679692	0.617617	0.68706	0.699094	0.62038	0.609942	0.581883
T cells	0.905017	0.862011	0.832336	0.886793	0.874722	0.908356	0.908222	0.820801	0.939187	0.908543	0.846869	0.835595	0.915771	0.907128	0.938369	0.928462	0.939018	0.882494	0.881654	0.861292	0.821761	0.92785	0.8643	0.863754	0.929827	0.859025	0.815606	0.908808	0.895812	0.888727	0.839567	0.901742	0.869114	0.874265	0.855879	0.882849	0.859057	0.924526	0.824807	0.866284	0.930199	0.932718	0.912281	0.955605	0.952715	0.964715	0.977122	0.943314	0.950285
T helper cells	0.840855	0.807483	0.798774	0.828172	0.831006	0.854767	0.843882	0.801933	0.856349	0.841308	0.812081	0.809205	0.841509	0.815365	0.847668	0.837522	0.835223	0.842335	0.839068	0.823361	0.829655	0.870359	0.823391	0.832246	0.865346	0.825295	0.789136	0.841319	0.847945	0.837013	0.797947	0.848608	0.832268	0.821974	0.837731	0.840725	0.815578	0.849065	0.81618	0.826267	0.847518	0.854879	0.838977	0.855867	0.858107	0.86634	0.872026	0.850903	0.854034
Tcm	0.754724	0.733722	0.724813	0.737286	0.762702	0.78272	0.763191	0.749339	0.736682	0.775377	0.742152	0.734787	0.778455	0.745153	0.773591	0.791128	0.780063	0.733323	0.748755	0.72854	0.687604	0.75263	0.72713	0.721023	0.760384	0.732131	0.698835	0.757156	0.751327	0.760065	0.72488	0.756835	0.72789	0.747729	0.737492	0.722774	0.748518	0.746908	0.714048	0.707232	0.757097	0.771997	0.737645	0.787224	0.789426	0.793047	0.80118	0.775219	0.792294
Tem	0.685339	0.709768	0.729551	0.666582	0.711357	0.749978	0.726024	0.738132	0.691996	0.700974	0.725341	0.72736	0.729022	0.714708	0.714473	0.693468	0.709352	0.687737	0.66653	0.65843	0.693086	0.678655	0.639452	0.662329	0.682001	0.660571	0.662574	0.675058	0.681934	0.705594	0.68392	0.691567	0.690002	0.678176	0.690109	0.651451	0.708324	0.700115	0.654913	0.662235	0.707396	0.729131	0.70075	0.724072	0.71289	0.741242	0.713819	0.716857	0.747775
TFH	0.558921	0.509648	0.544243	0.50422	0.55087	0.545975	0.535096	0.504824	0.55496	0.534225	0.542733	0.523809	0.540427	0.523703	0.549092	0.518517	0.571642	0.542073	0.524138	0.530205	0.505632	0.581923	0.537533	0.502625	0.558406	0.509903	0.550828	0.519865	0.54315	0.546274	0.511293	0.565879	0.508856	0.522829	0.513158	0.52411	0.511271	0.576554	0.487629	0.506907	0.548885	0.545095	0.522821	0.53876	0.519683	0.521215	0.575944	0.571908	0.541612
Tgd	0.587733	0.467731	0.507051	0.463892	0.489131	0.627567	0.452143	0.413378	0.509859	0.622704	0.486819	0.470769	0.583225	0.4456	0.567685	0.47246	0.597864	0.59802	0.475121	0.413484	0.507313	0.583639	0.468538	0.463377	0.596929	0.446105	0.49424	0.51297	0.479039	0.67154	0.495548	0.587721	0.520194	0.572611	0.598351	0.460631	0.381471	0.598989	0.462277	0.458763	0.616023	0.503592	0.457728	0.592269	0.651563	0.549738	0.66372	0.600365	0.537695
Th1 cells	0.59195	0.558228	0.576205	0.560704	0.572831	0.603186	0.553898	0.517348	0.584123	0.568507	0.550322	0.563818	0.58116	0.554123	0.612092	0.5552	0.571671	0.597107	0.58345	0.557673	0.528093	0.624917	0.539727	0.583657	0.568692	0.557594	0.49603	0.589644	0.608398	0.586467	0.565026	0.583389	0.559662	0.583144	0.600212	0.57698	0.535031	0.579215	0.557239	0.564164	0.595542	0.588984	0.568767	0.57844	0.598322	0.575949	0.608108	0.611096	0.565858
Th17 cells	0.111563	0.258308	0.112545	0.123045	0.385527	0.0187268	0.2176	0.260579	0.230125	0.150858	0.173331	0.445023	0.148218	0.176892	0.0694428	0.17462	0.18997	0.0798193	0.112177	0.0279368	0.129184	0.164305	0.494143	0.0380063	0.0940026	0.185795	0.267088	0	0.145455	0.120896	0.065636	0.0370239	0.250387	0.203846	0.174743	0.353415	0.0136307	0.174743	0.248054	0.0995285	0.213179	0.0311295	0.131886	0.22202	0.327382	0.0496722	0.0248668	0.0498564	0.139008
Th2 cells	0.411135	0.399227	0.349735	0.390108	0.427448	0.459004	0.426577	0.354006	0.467991	0.410068	0.375575	0.403231	0.401004	0.382063	0.462777	0.426689	0.461953	0.392673	0.408389	0.424889	0.375056	0.483231	0.361444	0.403331	0.480613	0.402092	0.406583	0.444392	0.442064	0.428298	0.383015	0.443431	0.415654	0.377356	0.4524	0.41285	0.398948	0.435232	0.403198	0.440749	0.451844	0.441565	0.419896	0.436078	0.421541	0.448281	0.447663	0.449915	0.40515
TReg	0.223248	0.335241	0.398912	0.374291	0.390808	0.0732496	0.429244	0.210416	0.29877	0.202066	0.355933	0.247624	0.396334	0.280411	0.33082	0.155034	0.425437	0.333153	0.442076	0.0942482	0.475232	0.502125	0.201267	0.525211	0.064408	0.457426	0.517782	0.383931	0.466329	0.283113	0.18469	0.12108	0.380799	0.45276	0.324496	0.0559963	0.279797	0.42206	0.409412	0.348688	0.189724	0.187944	0.210355	0.427831	0.358818	0.445023	0.366616	0.411315	0.336715
[truncated: 14 more columns]
