# Supplementary material for: Machine learning identifies novel coagulation genes as diagnostic and immunological biomarkers in ischemic stroke
Source: Aging (Albany NY). 2024 Apr 3;16(7):6314–33. doi: 10.18632/aging.205706 (PMC11042924; doi:10.18632/aging.205706)
Supplement: Supplementary Table 2 [file aging-16-205706-s003.xlsx]

## Sheet: Supplementary Table 5  limma.Cl
Supplementary Table 2. The differentially expressed genes between Cluster 1 and Cluster 2.
Symbol	logFC	AveExpr	t	P.Value	adj.P.Val	B
HSH2D	-0.992094	10.5024	-5.37795	3.75145e-06	0.0518212	4.11306
KLHL11	-0.263771	7.77606	-5.03014	1.13217e-05	0.0518212	3.15253
FLJ11795	-0.663597	8.76144	-5.01563	1.18529e-05	0.0518212	3.1126
GHRL	-0.704489	8.61526	-4.97749	1.33703e-05	0.0518212	3.0077
SPRYD3	1.64212	13.4057	4.88943	1.76479e-05	0.0518212	2.76588
ADRA2C	0.789802	9.53472	4.86697	1.89399e-05	0.0518212	2.70432
SCML4	-0.546012	8.40612	-4.73991	2.82157e-05	0.0518212	2.35687
GPR175	1.353	12.6276	4.73078	2.90334e-05	0.0518212	2.33197
C17orf27	1.56988	12.5614	4.69148	3.28282e-05	0.0518212	2.22486
PNLIPRP1	-0.187213	7.59043	-4.67297	3.47804e-05	0.0518212	2.17449
C3orf25	-0.242949	7.84152	-4.61745	4.13498e-05	0.0518212	2.02362
MGC33692	1.0364	11.2572	4.59322	4.45858e-05	0.0518212	1.95791
C7orf28B	1.88178	10.0226	4.58498	4.57424e-05	0.0518212	1.93558
LOC653745	-0.523453	8.63195	-4.57198	4.76267e-05	0.0518212	1.90037
DPYSL5	1.32369	11.5947	4.56603	4.85159e-05	0.0518212	1.88424
F11	-0.231909	7.81027	-4.55451	5.02809e-05	0.0518212	1.85308
ROPN1B	1.33916	10.3382	4.53643	5.31814e-05	0.0518212	1.80417
ARL11	-0.433727	8.29064	-4.53228	5.387e-05	0.0518212	1.79295
CAMK1G	1.04364	9.44797	4.52425	5.5226e-05	0.0518212	1.77127
HELB	-0.357364	7.99244	-4.47993	6.33432e-05	0.0518212	1.65167
C20orf32	-0.274667	7.97849	-4.42455	7.51466e-05	0.0518212	1.50266
HIST1H1D	-0.204146	7.69693	-4.41603	7.71452e-05	0.0518212	1.47977
ANKRD55	-0.591265	8.65958	-4.41537	7.73026e-05	0.0518212	1.47799
CCDC52	0.984987	9.30853	4.41503	7.73833e-05	0.0518212	1.47708
PLEKHA7	-0.178332	7.78953	-4.40366	8.01398e-05	0.0518212	1.44656
HBE1	1.03775	11.4142	4.38217	8.56159e-05	0.0518212	1.38892
TEKT2	-0.216031	7.95495	-4.37112	8.85721e-05	0.0518212	1.35932
KIAA0319L	-0.651079	9.69914	-4.35471	9.31467e-05	0.0518212	1.3154
RBM39	-0.598859	10.4938	-4.35397	9.33599e-05	0.0518212	1.31341
PAPOLG	-0.357738	8.24194	-4.34535	9.58599e-05	0.0518212	1.29037
TRPV1	-0.187314	7.48459	-4.34151	9.69959e-05	0.0518212	1.2801
MAX	-0.356464	7.84444	-4.33724	9.82747e-05	0.0518212	1.26868
ZMAT1	-0.306736	7.79338	-4.33617	9.85962e-05	0.0518212	1.26583
LGALS3	1.67566	11.5802	4.33059	0.000100295	0.0518212	1.25093
CYP4F3	-0.311931	7.93528	-4.31723	0.000104484	0.0518212	1.21526
SULT6B1	-0.221033	7.94994	-4.30699	0.000107811	0.0518212	1.18793
OR51E2	-0.215439	7.78834	-4.2936	0.000112318	0.0518212	1.15222
MGC11332	-0.346289	7.74922	-4.29246	0.00011271	0.0518212	1.14919
C1QTNF6	-0.220444	7.71112	-4.29112	0.000113172	0.0518212	1.14562
AAK1	-0.212121	7.64813	-4.28575	0.000115044	0.0518212	1.13132
SALL3	0.615708	9.33499	4.28563	0.000115085	0.0518212	1.131
LOC440313	1.37536	12.0598	4.28073	0.000116821	0.0518212	1.11796
SERPINA13	1.59489	11.8828	4.25065	0.000128048	0.0550027	1.03797
C1orf64	-0.19763	7.63757	-4.23537	0.00013415	0.0550027	0.997387
EXOC1	-0.230493	8.04482	-4.22981	0.000136441	0.0550027	0.982625
TCF21	-0.202892	7.66383	-4.22851	0.00013698	0.0550027	0.979191
AIPL1	-0.220559	7.69924	-4.22429	0.000138754	0.0550027	0.967976
TRIM25	-0.80474	11.037	-4.21302	0.000143592	0.0553245	0.938108
POGZ	-0.540625	8.7639	-4.20866	0.000145505	0.0553245	0.926572
OR10H1	-0.175806	7.42127	-4.17754	0.000159926	0.0595915	0.84422
ZNF407	-0.24159	7.59747	-4.13086	0.000184203	0.0660788	0.721085
LOC440926	2.45703	12.4992	4.13045	0.000184429	0.0660788	0.720017
C4orf15	-0.199929	7.80195	-4.08851	0.000209315	0.06973	0.609765
RNF13	-0.501906	8.56226	-4.08347	0.000212516	0.06973	0.596547
OR2Z1	-0.177753	7.58591	-4.07856	0.000215686	0.06973	0.583654
CCDC17	-0.329528	8.14898	-4.07389	0.000218738	0.06973	0.571416
LOC651321	-0.194292	7.86362	-4.06355	0.000225649	0.06973	0.544329
ATXN3	-0.383427	8.00244	-4.05658	0.000230427	0.06973	0.526084
ZNF417	-0.390749	8.36823	-4.05641	0.000230542	0.06973	0.525651
MAML3	-0.42137	8.27312	-4.05492	0.000231578	0.06973	0.521744
KCNS2	-0.167165	7.76471	-4.05425	0.000232046	0.06973	0.519987
CRELD1	-0.182916	7.69969	-4.05285	0.000233024	0.06973	0.516326
CCL24	-0.188345	7.39518	-4.04892	0.000235789	0.06973	0.506054
ADRA1A	-0.173487	7.59469	-4.02163	0.000255917	0.0744999	0.434739
C1orf56	-0.565786	8.73266	-4.01588	0.00026036	0.0746272	0.419758
KENAE	-0.431247	8.4898	-4.00175	0.00027161	0.0766062	0.382937
FLJ20152	-0.387217	7.94479	-3.99443	0.000277624	0.0766062	0.363876
FTHL3	1.80446	12.4031	3.9818	0.000288313	0.0766062	0.330999
TAGAP	-0.575565	10.2224	-3.97991	0.000289945	0.0766062	0.326089
BNIPL	-0.360746	8.32594	-3.96818	0.000300275	0.0766062	0.295625
GRASP	-0.203374	7.98452	-3.96589	0.000302339	0.0766062	0.289667
AGXT	-0.196908	7.66837	-3.96358	0.000304423	0.0766062	0.283688
HIST2H2BF	-0.345842	8.22778	-3.96174	0.000306103	0.0766062	0.278901
CSRP3	-0.151419	7.38687	-3.96115	0.000306646	0.0766062	0.277358
EIF5	-0.230758	7.6679	-3.95925	0.000308382	0.0766062	0.272447
PCDHB1	-0.187754	7.43543	-3.94799	0.000318916	0.0774895	0.243227
ANXA11	-0.762852	11.5012	-3.94658	0.000320256	0.0774895	0.239578
DUSP18	-0.569373	10.5142	-3.93498	0.000331503	0.0791826	0.209552
CXCR4	-0.882726	11.2426	-3.92897	0.000337485	0.0792235	0.193997
FTHL11	1.95872	11.9889	3.91886	0.000347789	0.0792235	0.167839
ANXA2P1	1.67173	11.6981	3.91579	0.00035098	0.0792235	0.159898
SUV420H1	-0.480877	9.06749	-3.91335	0.000353526	0.0792235	0.153612
AKR1CL1	-0.179473	7.69478	-3.91	0.000357066	0.0792235	0.144946
FFAR3	-0.188011	7.80741	-3.90988	0.000357188	0.0792235	0.14465
BCAS3	-0.188176	7.73962	-3.90241	0.000365202	0.0800481	0.125354
ZNF397	-0.39145	8.38347	-3.89548	0.000372789	0.0804021	0.107477
WNT7B	-0.217983	7.7545	-3.89308	0.000375449	0.0804021	0.101295
TAS2R43	-0.177274	7.8232	-3.87863	0.000391872	0.0829654	0.0640738
GLT8D1	-0.182601	7.57597	-3.86881	0.000403439	0.0834529	0.0387845
C1orf183	-0.476237	8.4196	-3.86374	0.000409534	0.0834529	0.0257508
TAB3	-0.338669	8.1155	-3.85014	0.000426329	0.0834529	-0.0091788
COQ6	-0.216684	8.00238	-3.84997	0.000426542	0.0834529	-0.00961349
HIST1H4F	-0.206073	7.63488	-3.84961	0.000426995	0.0834529	-0.0105365
TMEM71	-0.615866	12.9424	-3.84817	0.000428814	0.0834529	-0.014231
IGFBP1	0.977064	10.1197	3.83691	0.000443312	0.0834529	-0.0431242
TRIM59	-0.17063	7.47062	-3.83378	0.000447424	0.0834529	-0.0511466
FCGR3A	2.20732	10.4351	3.83174	0.000450121	0.0834529	-0.0563695
PI16	-0.502601	8.43843	-3.83042	0.000451873	0.0834529	-0.0597436
KCNE3	-0.331841	8.13423	-3.82975	0.000452774	0.0834529	-0.0614742
BLVRB	1.2603	11.818	3.82911	0.000453627	0.0834529	-0.0631103
CLUL1	-0.246405	7.93538	-3.82557	0.000458387	0.0834529	-0.0721791
PPP2R2D	-0.23685	7.87184	-3.82383	0.000460746	0.0834529	-0.0766392
TNFRSF10A	-0.614583	8.56674	-3.82337	0.000461363	0.0834529	-0.0778015
VNN3	-0.428047	8.44587	-3.81112	0.000478312	0.0855956	-0.109144
LOC283152	-0.247814	7.65845	-3.80823	0.000482397	0.0855956	-0.116531
BNIP3L	1.38584	10.027	3.79168	0.000506462	0.086831	-0.158814
G6PC	0.691608	8.73193	3.7893	0.000510014	0.086831	-0.164883
CNGA2	-0.19777	7.65018	-3.78887	0.000510654	0.086831	-0.165972
LOC387680	-0.379005	8.31854	-3.77893	0.000525774	0.086831	-0.19131
CEP170	-0.2028	8.19339	-3.77248	0.00053582	0.086831	-0.207743
PLGLB1	-0.655954	8.59164	-3.77241	0.00053593	0.086831	-0.207921
PRO0628	-0.58315	9.33176	-3.77013	0.000539528	0.086831	-0.213731
TNFSF14	-0.595433	11.163	-3.76998	0.000539767	0.086831	-0.214115
LY6G5C	-0.163146	7.54641	-3.76488	0.000547893	0.086831	-0.227088
FCGR3B	1.5553	12.6997	3.76156	0.000553249	0.086831	-0.235534
FTHL12	1.1706	14.1826	3.75878	0.000557771	0.086831	-0.242601
GABARAPL2	1.58314	10.308	3.75874	0.000557829	0.086831	-0.242691
FTHL2	1.73549	9.77598	3.75837	0.000558432	0.086831	-0.243628
RAPGEF1	-0.540432	8.56153	-3.75754	0.000559791	0.086831	-0.245738
RTF1	0.699024	10.2145	3.75652	0.000561472	0.086831	-0.248341
C6orf159	-0.205628	7.77467	-3.75503	0.000563928	0.086831	-0.25213
NKX2-3	-0.194278	7.62451	-3.75179	0.0005693	0.0869396	-0.26036
HOXA4	-0.187732	7.52221	-3.72286	0.000619534	0.0934359	-0.333743
DKFZp686K16132	-0.67215	9.03276	-3.7167	0.000630758	0.0934359	-0.34932
AKR1B10	-0.158883	7.46144	-3.71559	0.000632809	0.0934359	-0.352137
ANXA8	-0.222467	7.86381	-3.71551	0.000632952	0.0934359	-0.352333
WBSCR14	-0.203322	7.74789	-3.71337	0.000636915	0.0934359	-0.357748
CXorf1	-0.157601	7.59337	-3.70634	0.000650107	0.0937196	-0.375532
OR4F3	-0.219926	7.658	-3.70437	0.000653842	0.0937196	-0.380501
AFG3L1	-0.257879	7.82908	-3.70432	0.00065394	0.0937196	-0.380631
TRERF1	-0.176391	7.37483	-3.69881	0.000664517	0.0938178	-0.394549
C7orf34	-0.300205	7.93934	-3.69554	0.000670876	0.0938178	-0.402809
C16orf28	-0.530315	9.12246	-3.69076	0.000680275	0.0938178	-0.414875
ACAA1	-0.553275	10.5209	-3.68928	0.000683195	0.0938178	-0.418589
LIPF	-0.197373	7.90076	-3.68722	0.000687309	0.0938178	-0.423796
2023-03-06	-0.731687	10.416	-3.68443	0.000692916	0.0938178	-0.430841
PPBP	1.17245	11.2463	3.6842	0.00069337	0.0938178	-0.43141
INPP4A	-0.314192	8.22513	-3.68337	0.000695048	0.0938178	-0.433506
SLC14A2	-0.170158	7.77285	-3.68095	0.000699945	0.0938178	-0.439593
TMEM26	-0.177704	7.59641	-3.67541	0.000711316	0.0942163	-0.453566
AGTPBP1	1.3765	8.99634	3.67458	0.000713032	0.0942163	-0.455655
PPIB	1.60256	9.27673	3.66225	0.000739003	0.0967633	-0.486672
PTMA	2.13679	11.6165	3.66053	0.000742695	0.0967633	-0.490991
LOC283392	-0.172947	7.69801	-3.65099	0.000763533	0.0973597	-0.514975
OR8J3	-0.184316	7.65564	-3.64879	0.000768401	0.0973597	-0.520484
IGF1R	-0.315949	8.19364	-3.64679	0.000772869	0.0973597	-0.525508
GDF9	-0.188516	7.65195	-3.64556	0.000775615	0.0973597	-0.528583
NUP155	-0.152159	7.53615	-3.64048	0.00078712	0.0973597	-0.541343
NDUFB6	-0.581215	10.3393	-3.63974	0.000788792	0.0973597	-0.543182
ZNF599	-0.167135	7.52255	-3.63714	0.000794761	0.0973597	-0.549715
VIPR1	-0.484214	9.52914	-3.63578	0.000797894	0.0973597	-0.553123
FLJ11000	-0.628017	12.1307	-3.63221	0.000806158	0.0973597	-0.562052
GAD2	-0.159217	7.67077	-3.63194	0.000806807	0.0973597	-0.562749
NLE1	-0.191403	7.74922	-3.63088	0.00080928	0.0973597	-0.5654
ABR	-0.32165	8.24368	-3.62964	0.00081218	0.0973597	-0.5685
KIAA1456	-0.156963	7.57434	-3.62444	0.000824482	0.0973597	-0.581524
APITD1	-0.213169	7.52835	-3.62213	0.000830003	0.0973597	-0.587306
DVL1	-0.239691	7.71578	-3.62159	0.000831298	0.0973597	-0.588657
IL1RAPL1	-0.165385	7.61297	-3.61679	0.00084289	0.0973597	-0.600653
FUT2	-0.151905	7.29712	-3.61522	0.00084673	0.0973597	-0.60459
FGF23	-0.152288	7.56083	-3.61385	0.000850071	0.0973597	-0.608001
UGT2A1	-0.18327	7.49314	-3.61312	0.000851864	0.0973597	-0.609826
TNKS1BP1	-0.154221	7.68045	-3.61062	0.000858039	0.0973597	-0.616082
RCP9	-0.259755	7.84411	-3.6091	0.000861819	0.0973597	-0.619889
VPS39	-0.44969	8.70058	-3.60893	0.000862237	0.0973597	-0.62031
PNMA2	-0.188247	7.7807	-3.60422	0.000874027	0.0980964	-0.632072
LOC283174	-0.240407	8.09529	-3.59838	0.000888859	0.0982806	-0.646644
CITED1	-0.138294	7.58605	-3.59442	0.000899046	0.0982806	-0.656512
GSTT2	-0.212975	7.83856	-3.59337	0.000901777	0.0982806	-0.659138
TOB1	-0.633769	9.7558	-3.59089	0.000908225	0.0982806	-0.665307
RTN3	-0.285669	7.92956	-3.59061	0.000908972	0.0982806	-0.666019
HNRPH1	1.32857	8.773	3.59001	0.00091053	0.0982806	-0.667502
ADAMTS16	-0.172013	7.81656	-3.58897	0.000913276	0.0982806	-0.670109
EVI2B	1.77826	9.38149	3.58463	0.000924738	0.0982806	-0.680907
MOG	-0.183736	7.55035	-3.58389	0.000926715	0.0982806	-0.682756
BTRC	-0.158413	7.54699	-3.58284	0.000929505	0.0982806	-0.685358
FAM19A4	-0.227921	7.9314	-3.58128	0.000933695	0.0982806	-0.689252
PPM1E	-0.190079	7.79071	-3.5765	0.000946603	0.0987415	-0.701138
DMGDH	-0.172562	7.68793	-3.57574	0.000948673	0.0987415	-0.703029
MGC87631	-0.180461	7.77743	-3.57172	0.000959708	0.099154	-0.71304
LCE2B	-0.150446	7.55426	-3.57042	0.00096328	0.099154	-0.716255
ADAMTS6	-0.178963	7.72634	-3.56693	0.000972998	0.099604	-0.724942
ELAVL3	0.469888	8.23605	3.56141	0.000988534	0.100306	-0.738652
LOC388955	0.81702	8.32626	3.56067	0.000990624	0.100306	-0.740479
HIST1H2AK	-0.215037	7.65033	-3.55741	0.000999932	0.100701	-0.748572
TTC12	-0.211595	7.7015	-3.55517	0.00100638	0.100806	-0.754137
RABGGTA	-0.191486	7.80313	-3.55195	0.00101573	0.101198	-0.762137
HIST1H2BA	-0.162916	7.44743	-3.54758	0.00102853	0.101747	-0.772969
UBQLN3	-0.200925	8.04743	-3.54544	0.00103484	0.101747	-0.778263
HSN2	-0.309777	8.07192	-3.54344	0.00104078	0.101747	-0.783211
ACSL3	-0.233256	8.00918	-3.53895	0.00105424	0.101747	-0.79433
NIP30	-0.417847	8.92303	-3.538	0.00105712	0.101747	-0.796692
CAT	1.4117	11.1928	3.53608	0.00106294	0.101747	-0.801439
TTRAP	1.57604	9.55496	3.53394	0.00106945	0.101747	-0.806724
GSK3B	-0.525567	10.5192	-3.53257	0.00107368	0.101747	-0.810136
RUFY1	-0.165892	7.70387	-3.53222	0.00107473	0.101747	-0.810982
CLEC7A	1.01288	8.39363	3.53006	0.00108141	0.101747	-0.81634
DMRT1	-0.152146	7.50411	-3.53005	0.00108143	0.101747	-0.816352
COP1	1.28685	9.26542	3.52833	0.00108677	0.101747	-0.820616
Septin 7	1.40722	9.53051	3.51975	0.00111373	0.101899	-0.841809
TMEM74	-0.148029	7.52978	-3.51951	0.0011145	0.101899	-0.842405
LOC285527	-0.219801	7.76136	-3.51942	0.00111478	0.101899	-0.842624
MAGI1	-0.190259	7.46945	-3.51556	0.00112712	0.101899	-0.852142
MOGAT3	-0.143244	7.52347	-3.5145	0.00113056	0.101899	-0.854777
ISG20	-0.629389	13.5429	-3.51313	0.00113499	0.101899	-0.858155
ANKRD42	-0.153374	7.5527	-3.51287	0.00113581	0.101899	-0.85878
MGC3123	-0.362352	8.46289	-3.51165	0.00113979	0.101899	-0.861809
PROC	-0.188059	7.7298	-3.51114	0.00114145	0.101899	-0.863064
DERPC	-0.281912	8.064	-3.51064	0.00114308	0.101899	-0.8643
GALR1	-0.152065	7.61892	-3.50879	0.00114913	0.101949	-0.868859
PRKAR1B	-0.229108	7.57377	-3.50321	0.00116754	0.103092	-0.882599
GDAP2	-0.372036	8.6172	-3.49237	0.00120415	0.104413	-0.909291
SPATA4	-0.157742	7.7208	-3.49213	0.00120499	0.104413	-0.909889
SAA1	-0.176069	7.72621	-3.49195	0.0012056	0.104413	-0.910325
PHLDB1	0.517742	8.60664	3.49143	0.00120738	0.104413	-0.911605
FAM112A	-0.176195	7.47494	-3.4884	0.00121786	0.104413	-0.919071
MOSC1	-0.758891	10.7935	-3.4878	0.00121991	0.104413	-0.920528
CNTNAP4	-0.164507	7.58057	-3.48657	0.00122421	0.104413	-0.923566
TBC1D10C	-0.604145	11.9226	-3.48528	0.0012287	0.104413	-0.926728
BMP2	-0.223197	7.75618	-3.48256	0.00123825	0.104413	-0.93342
EPS15L1	-0.370488	8.57846	-3.48248	0.00123854	0.104413	-0.93362
SMC1L1	-0.337371	8.0461	-3.47975	0.00124817	0.104619	-0.940317
ATG10	-0.334494	8.1724	-3.47739	0.00125657	0.104619	-0.946111
LOC201164	-0.306116	8.04609	-3.47704	0.00125784	0.104619	-0.946979
SPRR2B	-0.179189	7.66871	-3.47509	0.00126483	0.104734	-0.95177
SFRP4	-0.202329	7.57395	-3.46279	0.00130977	0.107975	-0.981931
DIP13B	-0.582296	9.97513	-3.45865	0.00132524	0.108769	-0.992071
COL4A3BP	-0.690359	9.71707	-3.4445	0.00137942	0.110504	-1.02667
ZNF169	-0.310951	8.15184	-3.44275	0.00138627	0.110504	-1.03095
REP15	-0.159146	7.52492	-3.43888	0.00140156	0.110504	-1.04042
C6orf62	1.37597	8.72204	3.43734	0.00140766	0.110504	-1.04417
ARL4D	-0.189977	7.64503	-3.43725	0.00140802	0.110504	-1.04439
RNF144	-0.530906	9.30151	-3.43662	0.00141052	0.110504	-1.04592
PSD4	-0.529917	10.2665	-3.43434	0.00141967	0.110504	-1.0515
RPS4Y1	2.66514	9.96876	3.4335	0.00142302	0.110504	-1.05353
EIF1AY	1.03133	8.34276	3.43329	0.00142387	0.110504	-1.05405
KRTHB3	-0.16341	7.82208	-3.43041	0.00143551	0.110504	-1.06108
CADPS2	-0.13969	7.68491	-3.42818	0.00144459	0.110504	-1.06652
ZNF11B	-0.584493	9.37271	-3.42318	0.00146512	0.110504	-1.0787
CPT1B	-0.206039	7.79616	-3.42283	0.00146657	0.110504	-1.07955
IGSF1	-0.154203	7.69203	-3.4193	0.00148125	0.110504	-1.08815
LSAMP	-0.192069	7.9583	-3.41886	0.00148312	0.110504	-1.08923
CCDC49	-0.54954	9.74981	-3.41618	0.00149434	0.110504	-1.09574
C1D	1.14436	8.50666	3.41459	0.00150107	0.110504	-1.09962
RPL23AP13	1.65327	9.15071	3.41328	0.00150661	0.110504	-1.10279
LY75	1.07716	8.35971	3.41327	0.00150669	0.110504	-1.10284
CTR9	0.933881	8.44892	3.41178	0.00151304	0.110504	-1.10647
AKR1C4	-0.172591	7.75778	-3.41034	0.00151916	0.110504	-1.10995
SYCN	-0.156699	7.60091	-3.40974	0.00152175	0.110504	-1.11142
ZNF287	-0.206417	7.60342	-3.4095	0.00152277	0.110504	-1.112
RNASE12	-0.156516	7.53697	-3.40778	0.00153017	0.110504	-1.11618
ARL6IP1	1.35058	8.77516	3.40773	0.0015304	0.110504	-1.11631
LOC643542	-0.158857	7.43093	-3.40601	0.00153782	0.110504	-1.12048
CD248	-0.32572	7.82494	-3.4041	0.00154612	0.110504	-1.12513
BTN1A1	-0.1654	7.37214	-3.40297	0.00155106	0.110504	-1.12788
EPHB6	-0.395857	8.25556	-3.40111	0.0015592	0.110504	-1.13239
AMD1	-0.518135	10.0192	-3.40072	0.00156089	0.110504	-1.13333
ZNF324	-0.512218	9.96692	-3.40005	0.00156384	0.110504	-1.13496
BMP2K	0.69522	8.98273	3.39966	0.00156556	0.110504	-1.13591
PCLKC	-0.20375	8.03037	-3.39925	0.00156736	0.110504	-1.1369
OR51D1	-0.199864	7.79009	-3.39853	0.00157056	0.110504	-1.13866
LOC649946	1.84753	12.5824	3.39828	0.00157167	0.110504	-1.13926
TOR1B	-0.640154	9.58101	-3.39803	0.00157279	0.110504	-1.13988
HIST1H3I	-0.171466	7.83946	-3.39528	0.00158497	0.110504	-1.14653
IGFBP6	-0.193574	7.80621	-3.39487	0.00158682	0.110504	-1.14754
KRT6L	-0.171526	7.64697	-3.39441	0.00158887	0.110504	-1.14865
EIF2B5	-0.527604	8.61078	-3.39321	0.00159423	0.110504	-1.15156
LOC441734	-0.162457	7.51904	-3.393	0.00159518	0.110504	-1.15207
HS6ST1	-0.174376	7.96205	-3.39149	0.00160197	0.110504	-1.15573
GREM2	-0.146865	7.62648	-3.39079	0.00160511	0.110504	-1.15742
SUMO2	1.50941	11.4081	3.38936	0.0016116	0.110504	-1.1609
SLC8A2	-0.146338	7.68152	-3.38787	0.00161838	0.110504	-1.16452
PHLPP	-0.296016	8.07155	-3.38768	0.00161922	0.110504	-1.16497
EIF2C2	-0.571109	11.3007	-3.38278	0.0016417	0.111472	-1.17686
GIMAP7	1.63266	9.6507	3.38157	0.00164724	0.111472	-1.17977
MGC50722	-0.192548	7.75966	-3.38065	0.00165152	0.111472	-1.182
TRIM39	-0.276937	7.82871	-3.37625	0.00167208	0.111472	-1.19267
CYorf15B	0.401593	8.16259	3.37206	0.00169185	0.111472	-1.2028
RAB6A	0.883871	8.80802	3.36876	0.00170755	0.111472	-1.21076
FOXA1	-0.172376	7.48875	-3.36778	0.00171227	0.111472	-1.21314
PCAF	0.788885	8.44939	3.36771	0.00171262	0.111472	-1.21332
CD200R1	-0.20281	7.61902	-3.36759	0.00171318	0.111472	-1.2136
PHF20	-0.418147	9.17273	-3.36587	0.00172145	0.111472	-1.21775
TRPA1	0.410392	8.11743	3.3658	0.00172181	0.111472	-1.21793
USP4	-0.432269	8.61369	-3.36557	0.00172291	0.111472	-1.21848
SEC6L1	-0.50517	9.47772	-3.3653	0.00172423	0.111472	-1.21914
GNMT	-0.210418	7.75833	-3.36327	0.00173406	0.111472	-1.22404
MON1B	-0.46256	8.73665	-3.36151	0.00174264	0.111472	-1.22829
ZFP2	-0.169803	7.71376	-3.35825	0.00175859	0.111472	-1.23614
PILRB	-0.209822	7.75274	-3.35821	0.0017588	0.111472	-1.23625
SAMSN1	1.22104	8.92087	3.35806	0.00175955	0.111472	-1.23661
EHF	-0.149108	7.64384	-3.35514	0.00177401	0.111472	-1.24367
NARF	-0.536953	10.3851	-3.35481	0.00177565	0.111472	-1.24446
GSG1	-0.181317	7.80194	-3.35251	0.00178709	0.111472	-1.25
CASQ1	-0.126381	7.59049	-3.35081	0.00179563	0.111472	-1.2541
ASB3	-0.295318	7.73619	-3.35079	0.00179569	0.111472	-1.25413
FLJ20298	-0.144736	7.45365	-3.34965	0.00180148	0.111472	-1.2569
LOC389541	-0.433209	12.2519	-3.34901	0.00180467	0.111472	-1.25843
TMPRSS5	-0.139295	7.58264	-3.34896	0.00180495	0.111472	-1.25856
CXCL5	0.493706	8.25102	3.3457	0.00182145	0.111472	-1.2664
ALMS1	-0.254524	8.28462	-3.34499	0.00182507	0.111472	-1.26811
CENTD3	-0.533554	11.7418	-3.34415	0.00182937	0.111472	-1.27014
PGAM4	1.08166	8.34486	3.34292	0.00183566	0.111472	-1.27309
ADI1	0.913999	8.68713	3.3413	0.00184401	0.111472	-1.27701
C9orf90	-0.445991	9.06295	-3.34096	0.00184577	0.111472	-1.27783
FBXW8	-0.164032	7.59513	-3.34078	0.00184669	0.111472	-1.27826
MBP	-0.539271	13.205	-3.34005	0.00185048	0.111472	-1.28002
DCUN1D2	-0.303759	7.97213	-3.33959	0.00185284	0.111472	-1.28112
FGA	0.405624	9.21322	3.33916	0.00185506	0.111472	-1.28215
HIST1H4C	-0.596137	13.7941	-3.33847	0.00185863	0.111472	-1.28381
SERPINA1	-0.344365	8.10158	-3.33717	0.00186542	0.111472	-1.28695
PRKCE	-0.283473	8.10037	-3.33691	0.00186674	0.111472	-1.28755
KIAA2026	-0.487552	9.06873	-3.33355	0.00188438	0.111779	-1.29566
BTBD5	-0.68894	10.2759	-3.33097	0.00189797	0.111779	-1.30184
ANP32A	1.37324	9.71884	3.33095	0.00189808	0.111779	-1.30189
CRNKL1	-0.351498	8.50004	-3.32996	0.00190334	0.111779	-1.30428
TMSB4X	1.57321	9.25757	3.32944	0.00190612	0.111779	-1.30553
LSM11	-0.179868	7.66567	-3.32911	0.00190787	0.111779	-1.30633
MGC2654	-0.447	9.87646	-3.32532	0.00192814	0.112567	-1.31543
B3GALT1	-0.192827	7.95204	-3.31953	0.00195949	0.112567	-1.32931
PTDSS1	-0.590386	9.62295	-3.31906	0.00196204	0.112567	-1.33043
C14orf19	1.13437	8.94958	3.31845	0.00196541	0.112567	-1.3319
CD302	1.05865	8.86253	3.31828	0.00196632	0.112567	-1.33231
PPM1F	-0.593063	12.9216	-3.3172	0.00197224	0.112567	-1.33489
BZRPL1	-0.200149	7.52166	-3.31569	0.0019806	0.112567	-1.33853
FLJ10490	-0.173753	7.59015	-3.31417	0.00198899	0.112567	-1.34217
SFMBT2	-0.390681	8.12215	-3.31389	0.00199052	0.112567	-1.34283
ZNF586	-0.610708	10.9596	-3.31265	0.00199741	0.112567	-1.34581
HIST4H4	-0.224093	7.72784	-3.3115	0.00200382	0.112567	-1.34856
FXC1	-0.354842	8.90517	-3.31099	0.00200665	0.112567	-1.34978
HLA-G	1.41084	11.0024	3.31083	0.00200756	0.112567	-1.35017
C12orf45	-0.377095	8.26039	-3.31017	0.00201122	0.112567	-1.35174
NDUFAF1	-0.371462	8.23666	-3.30911	0.00201717	0.112567	-1.35428
ETFB	-0.153201	7.45549	-3.3079	0.00202401	0.112567	-1.35719
CMTM8	-0.688209	9.2934	-3.30789	0.00202404	0.112567	-1.35721
LOC652968	0.866409	9.95267	3.30439	0.00204385	0.113074	-1.36559
USH2A	-0.135535	7.60929	-3.30414	0.00204529	0.113074	-1.3662
KCTD2	-0.389202	8.92669	-3.3022	0.00205634	0.113118	-1.37083
DAD1	-0.561542	12.5152	-3.3004	0.00206663	0.113118	-1.37513
BHMT2	-0.125362	7.39862	-3.29886	0.00207549	0.113118	-1.37881
PPP1R15B	1.17223	8.69534	3.29795	0.00208075	0.113118	-1.38098
TAOK1	-0.726962	9.2784	-3.29791	0.00208102	0.113118	-1.3811
FAM45B	-0.156177	7.75562	-3.29765	0.00208252	0.113118	-1.38172
SOX8	-0.395501	8.18942	-3.29474	0.00209942	0.113704	-1.38867
CD1E	-0.171964	7.74182	-3.29306	0.00210923	0.113905	-1.39268
PCDHGA4	-0.15557	7.35536	-3.28427	0.00216129	0.115493	-1.41366
CDC42EP4	-0.446146	9.86334	-3.28337	0.00216673	0.115493	-1.41582
C2orf12	1.18002	8.52834	3.28292	0.0021694	0.115493	-1.41688
OR1J4	-0.150801	7.70247	-3.2803	0.00218522	0.115493	-1.42313
ZBP1	-0.769763	11.1856	-3.27992	0.00218751	0.115493	-1.42402
RGPD1	-0.744084	8.54656	-3.27903	0.00219297	0.115493	-1.42617
DOCK5	-0.511872	9.10359	-3.27887	0.00219389	0.115493	-1.42653
SART1	-0.211975	7.75648	-3.27876	0.00219456	0.115493	-1.42679
GPBP1L1	1.04976	9.39165	3.27847	0.00219633	0.115493	-1.42749
RIPK5	-0.30794	8.65572	-3.2768	0.00220655	0.115493	-1.43148
DLL3	-0.160449	7.48119	-3.27314	0.00222902	0.115493	-1.44019
LIN7C	0.785492	8.4389	3.2729	0.00223053	0.115493	-1.44077
OR10S1	-0.133317	7.66839	-3.27185	0.002237	0.115493	-1.44326
FABP2	-0.174096	7.85439	-3.27048	0.00224551	0.115493	-1.44653
M160	-0.179389	7.70616	-3.26884	0.00225574	0.115493	-1.45044
FAM47C	-0.158171	7.69335	-3.26731	0.00226532	0.115493	-1.45408
HSBP1	-0.495294	11.6712	-3.2673	0.00226535	0.115493	-1.45409
CDC2L1	-0.177991	7.43458	-3.26659	0.00226982	0.115493	-1.45578
RPS4Y2	1.77516	9.51331	3.26616	0.00227253	0.115493	-1.45681
C7orf11	1.00078	8.95063	3.26496	0.00228008	0.115493	-1.45966
ARFIP1	-0.242725	7.85525	-3.26492	0.00228034	0.115493	-1.45976
CRLF1	-0.152202	7.84955	-3.26411	0.00228543	0.115493	-1.46168
EPB41	-0.249111	7.80627	-3.26247	0.00229582	0.115493	-1.46558
VTI1B	0.655117	9.51481	3.26104	0.00230494	0.115493	-1.46898
NF1	-0.321378	8.11153	-3.2605	0.00230839	0.115493	-1.47027
LATS1	-0.173229	7.69287	-3.26044	0.00230874	0.115493	-1.4704
PRR6	0.654939	10.1596	3.2603	0.00230965	0.115493	-1.47074
PHLDB3	-0.159395	7.73951	-3.25935	0.00231569	0.115493	-1.47298
ABCA5	-0.184777	7.75857	-3.25634	0.00233506	0.115493	-1.48014
NOL10	0.702181	9.52228	3.25577	0.00233875	0.115493	-1.4815
PHF15	-0.609322	9.91346	-3.2546	0.0023463	0.115493	-1.48427
SIGLEC5	-0.674084	9.9347	-3.25317	0.00235562	0.115493	-1.48767
C10orf26	-0.473652	10.0338	-3.25197	0.00236341	0.115493	-1.49051
IKBKB	0.966832	8.65235	3.25162	0.0023657	0.115493	-1.49135
KCNA3	-0.322957	7.72429	-3.25146	0.00236677	0.115493	-1.49173
FAM98B	-0.153266	7.78545	-3.25131	0.00236775	0.115493	-1.49209
SLA	-0.605107	9.48872	-3.25127	0.00236801	0.115493	-1.49218
LOC440686	1.18128	8.91581	3.25032	0.00237422	0.115494	-1.49444
SEMA5B	-0.17434	7.52625	-3.24804	0.0023892	0.11592	-1.49984
DAPK2	-0.475638	8.94382	-3.24627	0.00240093	0.116186	-1.50405
METTL7A	1.12914	10.0266	3.2426	0.00242534	0.116329	-1.51274
TANK	1.37468	9.37769	3.24084	0.00243716	0.116329	-1.51691
FLG2	-0.137399	7.55672	-3.24035	0.00244042	0.116329	-1.51806
AMICA1	-0.467201	13.9327	-3.23893	0.00244998	0.116329	-1.52142
FAM77D	-0.15354	7.91434	-3.23772	0.00245817	0.116329	-1.52429
HIST1H1E	-0.156175	7.42825	-3.23752	0.00245955	0.116329	-1.52477
RAB42	-0.182748	7.96383	-3.23465	0.00247903	0.116329	-1.53155
C20orf108	0.875824	11.3659	3.23411	0.00248277	0.116329	-1.53284
C10orf111	-0.142617	7.5627	-3.23356	0.00248652	0.116329	-1.53414
RPP30	-0.150057	7.53609	-3.23333	0.00248809	0.116329	-1.53468
C8orf44	-0.338068	8.24744	-3.2322	0.00249588	0.116329	-1.53736
FAM83F	0.526887	8.42006	3.23088	0.00250495	0.116329	-1.54048
FLJ46321	-0.13085	7.54007	-3.23061	0.0025068	0.116329	-1.54111
TAS2R48	-0.142972	7.54117	-3.2304	0.00250826	0.116329	-1.54162
BDP1	-0.323578	8.0662	-3.22958	0.00251391	0.116329	-1.54355
KIAA1727	-0.209441	7.89791	-3.22835	0.00252246	0.116329	-1.54646
HMG1L1	1.37222	9.92001	3.2283	0.00252277	0.116329	-1.54657
ANKFY1	-0.292986	7.95299	-3.22792	0.0025254	0.116329	-1.54746
RPESP	-0.146833	7.65405	-3.22769	0.00252701	0.116329	-1.54801
SFXN1	-0.422582	8.33758	-3.22689	0.00253261	0.116329	-1.54991
WTAP	-0.215609	7.68146	-3.2265	0.00253533	0.116329	-1.55083
LOC349236	-0.548649	10.3886	-3.22491	0.00254645	0.116329	-1.55459
ARG99	-0.173904	7.59301	-3.22219	0.00256557	0.116329	-1.56101
VEPH1	-0.147453	7.53837	-3.22204	0.00256662	0.116329	-1.56137
RN7SK	-0.862178	11.1993	-3.22202	0.0025668	0.116329	-1.56142
MTUS1	-0.161114	7.6214	-3.22137	0.00257137	0.116329	-1.56295
FLJ37357	0.927354	8.53686	3.22122	0.00257245	0.116329	-1.56331
HRASLS5	-0.148829	7.48065	-3.21959	0.00258399	0.116567	-1.56715
CCDC33	-0.145683	7.71619	-3.21642	0.0026066	0.117091	-1.57463
OR2AE1	-0.138376	7.52347	-3.21613	0.00260864	0.117091	-1.57531
RARG	-0.162239	7.81074	-3.21481	0.00261818	0.117091	-1.57844
RSAFD1	0.667726	9.6965	3.21445	0.00262073	0.117091	-1.57928
PCDH19	-0.138482	7.62246	-3.21263	0.00263389	0.117397	-1.58358
PAGE3	-0.1685	7.66547	-3.20747	0.00267144	0.118661	-1.59573
DKK1	-0.152747	7.40024	-3.20626	0.0026803	0.118661	-1.59857
NR1I2	-0.175012	7.75665	-3.20612	0.00268136	0.118661	-1.59891
MIA3	-0.340951	8.04906	-3.20473	0.00269158	0.118832	-1.60217
FLJ16124	-0.144719	7.47949	-3.20212	0.00271094	0.118904	-1.60832
FBXL20	-0.450253	9.08448	-3.20165	0.00271448	0.118904	-1.60944
CCDC57	-0.214845	7.76058	-3.20155	0.00271518	0.118904	-1.60966
GSTM3	-0.374314	7.97396	-3.20027	0.00272471	0.118904	-1.61267
ZNF81	-0.210455	7.77478	-3.19944	0.00273091	0.118904	-1.61462
MAP3K7IP2	0.960215	8.97775	3.19911	0.00273342	0.118904	-1.61541
CBFA2T2	-0.261569	7.79347	-3.19829	0.0027396	0.118904	-1.61735
VGLL1	-0.141413	7.7646	-3.19719	0.00274785	0.118904	-1.61993
PTPN6	-0.267582	7.97686	-3.19546	0.00276091	0.118904	-1.62399
TCF12	-0.13709	7.52924	-3.19497	0.00276463	0.118904	-1.62515
NOC2L	-0.172589	7.82992	-3.19496	0.00276467	0.118904	-1.62516
TOP1P1	0.905429	8.18618	3.19428	0.00276981	0.118904	-1.62675
FCHSD1	-0.195406	7.77499	-3.18918	0.00280876	0.119462	-1.63874
STX7	0.702515	8.12854	3.18743	0.0028223	0.119462	-1.64286
KCTD12	1.30125	8.75191	3.1871	0.00282483	0.119462	-1.64363
DKFZP686E2158	-0.146684	7.90695	-3.18706	0.0028251	0.119462	-1.64371
DDX17	-1.04488	11.648	-3.18692	0.00282624	0.119462	-1.64406
HOXB4	-0.179304	7.72266	-3.18495	0.00284149	0.119462	-1.64867
TOP1P2	0.909795	9.43823	3.1842	0.00284732	0.119462	-1.65043
NME2	0.643241	9.47245	3.18383	0.00285024	0.119462	-1.65131
KCNJ16	-0.167597	7.82549	-3.18354	0.0028525	0.119462	-1.65199
PIWIL2	-0.166911	7.64462	-3.1829	0.00285744	0.119462	-1.65347
VPREB1	-0.152979	7.64315	-3.18278	0.00285843	0.119462	-1.65377
ASCIZ	1.0176	8.87756	3.18261	0.00285976	0.119462	-1.65417
SPIN2B	-0.201018	7.66813	-3.18106	0.00287187	0.119485	-1.65779
DBF4	-0.179366	7.76988	-3.18019	0.00287874	0.119485	-1.65984
PPIC	-0.166996	7.35705	-3.17901	0.00288801	0.119485	-1.6626
FBXL22	-0.15813	7.58797	-3.17792	0.00289666	0.119485	-1.66516
ZBTB44	0.579578	9.26369	3.17771	0.00289829	0.119485	-1.66565
PABPC1	1.29715	12.2238	3.17756	0.00289953	0.119485	-1.66601
CYP2D7P1	-0.209102	7.97224	-3.17684	0.00290519	0.119485	-1.66768
FLJ43692	-0.33427	8.2019	-3.17537	0.0029169	0.119535	-1.67113
C6orf64	-0.371779	8.50774	-3.17508	0.00291924	0.119535	-1.67182
SEC61A2	-0.287277	7.99292	-3.17367	0.00293047	0.119732	-1.67511
MGC48915	-0.148518	7.45504	-3.17079	0.00295363	0.120105	-1.68186
PMCHL1	-0.165612	7.83391	-3.17065	0.00295476	0.120105	-1.68219
PTCHD3	-0.147232	7.76402	-3.16951	0.00296396	0.120105	-1.68485
HNF4A	-0.133241	7.67236	-3.16933	0.0029654	0.120105	-1.68527
RUNX1	-0.207644	7.84096	-3.16849	0.00297221	0.12012	-1.68724
ITM2B	1.26537	8.62823	3.16743	0.0029808	0.120206	-1.68971
TMEM34	0.274804	8.37146	3.16606	0.00299196	0.120282	-1.69292
CTBP2	-0.337824	8.27975	-3.16339	0.0030139	0.120282	-1.69918
OR5I1	-0.120741	7.55582	-3.16217	0.00302391	0.120282	-1.70202
CDKL4	-0.154712	7.63503	-3.16165	0.00302819	0.120282	-1.70323
RRAGD	-0.509285	10.7463	-3.16094	0.00303404	0.120282	-1.70489
NPHP4	-0.225557	7.85473	-3.15945	0.00304646	0.120282	-1.70839
ITGA7	-0.151865	7.80097	-3.15934	0.00304737	0.120282	-1.70864
OR2T6	-0.140378	7.658	-3.15772	0.00306081	0.120282	-1.71241
UTX	-0.557051	9.1444	-3.15704	0.00306654	0.120282	-1.71402
SLC30A10	-0.163028	7.64749	-3.15647	0.00307123	0.120282	-1.71533
RHBDD1	-0.306126	8.38225	-3.15578	0.00307707	0.120282	-1.71696
FOXN4	-0.154599	7.55976	-3.15483	0.00308505	0.120282	-1.71917
RET	-0.152019	7.73964	-3.15341	0.00309699	0.120282	-1.72248
KPNA2	0.95504	8.78553	3.151	0.00311739	0.120282	-1.72811
ERBB3	-0.145575	7.95391	-3.15093	0.00311795	0.120282	-1.72826
HIST1H2BI	-0.146008	7.38734	-3.15091	0.00311816	0.120282	-1.72832
C12orf50	-0.176296	7.68923	-3.14883	0.00313585	0.120282	-1.73317
C20orf54	-0.137389	7.63023	-3.14734	0.00314857	0.120282	-1.73664
SCARA5	-0.135102	7.54348	-3.14734	0.0031486	0.120282	-1.73664
SLC7A6OS	-0.296279	8.29545	-3.14328	0.00318356	0.120282	-1.7461
PRIM2A	0.480252	8.12508	3.14246	0.00319066	0.120282	-1.74801
PPP2R5A	-0.584195	11.5856	-3.14181	0.00319626	0.120282	-1.74951
ARMC7	-0.382052	8.66181	-3.14119	0.00320164	0.120282	-1.75095
PRAME	-0.180484	7.78775	-3.14118	0.00320173	0.120282	-1.75098
PRDM9	-0.177202	7.98026	-3.13945	0.00321687	0.120282	-1.75502
SRFBP1	-0.446846	8.42333	-3.13906	0.00322025	0.120282	-1.75592
MTP18	-0.213201	7.70536	-3.13848	0.00322533	0.120282	-1.75727
DLX1	-0.138131	7.84742	-3.13781	0.00323126	0.120282	-1.75884
WWC3	-0.496023	9.83522	-3.13736	0.0032352	0.120282	-1.75988
NLK	0.62878	8.61314	3.13726	0.00323608	0.120282	-1.76012
OR2G3	-0.171881	7.77953	-3.13676	0.00324051	0.120282	-1.76129
GSTCD	-0.200467	7.72328	-3.13639	0.00324372	0.120282	-1.76214
NACAP1	1.15973	9.73665	3.13631	0.00324441	0.120282	-1.76232
LOC653746	-0.170033	7.68149	-3.13629	0.00324459	0.120282	-1.76237
LOC497661	1.26878	9.48672	3.13603	0.00324687	0.120282	-1.76297
MGC15763	-0.524269	8.69992	-3.13522	0.00325404	0.120282	-1.76486
POLDIP3	-0.282642	7.92938	-3.13517	0.00325449	0.120282	-1.76497
FCGR2C	0.826484	8.24408	3.13508	0.00325532	0.120282	-1.76519
C8orf42	-0.146361	7.55382	-3.13464	0.00325915	0.120282	-1.7662
EGFL5	-0.534332	9.00563	-3.1346	0.00325956	0.120282	-1.76631
TREML2	-0.463255	9.50111	-3.13419	0.00326312	0.120282	-1.76724
FAM55C	-0.368125	8.17838	-3.13362	0.00326823	0.120282	-1.76858
KIAA1033	1.11524	8.90832	3.13316	0.00327226	0.120282	-1.76964
PSMC6	1.10169	8.57695	3.13286	0.00327496	0.120282	-1.77034
C1orf188	-0.155668	7.80062	-3.13266	0.00327674	0.120282	-1.77081
HHLA1	-0.141884	7.68275	-3.13233	0.00327965	0.120282	-1.77157
CTNNB1	0.881861	8.21596	3.13106	0.00329099	0.120461	-1.77453
ALOXE3	-0.134385	7.65972	-3.12982	0.00330207	0.120629	-1.7774
ZMYND8	-0.352925	8.42124	-3.12868	0.00331237	0.120769	-1.78007
WDR73	-0.422032	8.98118	-3.12744	0.00332351	0.120857	-1.78295
DMRT2	-0.172871	7.73891	-3.12697	0.00332776	0.120857	-1.78404
OR6C6	-0.145825	7.56098	-3.12512	0.00334451	0.121119	-1.78834
UNC5C	-0.178001	7.9364	-3.12465	0.00334876	0.121119	-1.78942
SCGB2A1	-0.131591	7.55809	-3.12323	0.00336171	0.121119	-1.79273
KCNJ2	-0.552896	11.1215	-3.12193	0.00337351	0.121119	-1.79573
WBSCR16	-0.171561	7.77661	-3.12168	0.00337579	0.121119	-1.79631
SLC7A3	-0.163468	7.62242	-3.12047	0.00338691	0.121119	-1.79912
PAOX	-0.257462	7.83449	-3.12013	0.00339004	0.121119	-1.79991
CA14	-0.133725	7.61666	-3.11938	0.00339692	0.121119	-1.80165
C14orf159	-0.556634	11.6545	-3.11926	0.00339807	0.121119	-1.80194
AKAP8L	-0.392201	8.70286	-3.11905	0.0034	0.121119	-1.80242
TEX13B	-0.144587	7.57704	-3.11765	0.00341289	0.121346	-1.80566
LOC392196	-0.145079	7.48996	-3.11603	0.00342796	0.12165	-1.80943
FLI1	1.0142	9.17474	3.11513	0.00343625	0.121712	-1.8115
CNOT6L	-0.366685	8.67747	-3.11362	0.00345032	0.121979	-1.815
LOC642181	-0.149564	7.61831	-3.11105	0.00347449	0.122099	-1.82097
SLC25A34	-0.206745	7.9083	-3.10909	0.00349293	0.122099	-1.8255
BRD8	-0.14302	7.39034	-3.1088	0.00349566	0.122099	-1.82617
PTPRS	-0.143127	7.76774	-3.10878	0.00349586	0.122099	-1.82622
FLJ10996	-0.208439	7.69535	-3.10797	0.00350354	0.122099	-1.82809
CHPT1	0.786314	10.4786	3.10741	0.00350883	0.122099	-1.82939
HIST1H4B	-0.148881	7.69067	-3.10666	0.00351593	0.122099	-1.83111
MXI1	-0.147179	7.51668	-3.10636	0.00351884	0.122099	-1.83182
STYXL1	-0.488638	9.98362	-3.10633	0.00351913	0.122099	-1.83189
UBE2U	-0.156615	7.85071	-3.10499	0.00353185	0.122099	-1.83498
USF1	-0.589256	10.0925	-3.10434	0.00353809	0.122099	-1.83649
TNPO3	-0.501697	10.3123	-3.10357	0.00354545	0.122099	-1.83827
MYH3	-0.321491	8.05096	-3.10303	0.00355069	0.122099	-1.83953
UBE2D2	-0.351468	8.24835	-3.10287	0.00355215	0.122099	-1.83988
CD164	1.40258	9.683	3.10264	0.00355442	0.122099	-1.84043
TRAPPC3	-0.520311	10.8191	-3.10221	0.00355856	0.122099	-1.84143
PRRG3	-0.140771	7.6263	-3.09874	0.00359202	0.122828	-1.84943
LCK	-0.147763	7.6697	-3.09829	0.00359645	0.122828	-1.85049
CPNE6	-0.120072	7.62134	-3.09796	0.00359959	0.122828	-1.85123
LOC440944	-0.318681	7.82847	-3.09714	0.00360757	0.122875	-1.85313
TOPORS	0.926466	8.50596	3.09505	0.00362798	0.123345	-1.85795
HSD11B2	-0.17098	7.65244	-3.09337	0.0036445	0.123678	-1.86184
FOXO1A	-0.491394	10.1109	-3.09136	0.00366431	0.123678	-1.86647
RSPO2	-0.216116	8.31962	-3.08993	0.00367847	0.123678	-1.86977
SYNE1	0.923085	8.09421	3.08949	0.00368287	0.123678	-1.87079
LYPD5	-0.145641	7.35675	-3.08939	0.00368391	0.123678	-1.87103
HSPA4	0.803877	8.65874	3.08933	0.00368446	0.123678	-1.87116
SYT2	-0.144615	7.42545	-3.08782	0.00369952	0.123678	-1.87465
MAP3K15	-0.189838	7.73965	-3.08761	0.00370155	0.123678	-1.87512
GPM6B	-0.143538	7.52523	-3.08709	0.00370676	0.123678	-1.87632
TRA1P2	0.829569	8.69653	3.08684	0.00370925	0.123678	-1.87689
TRIM29	-0.153155	7.4699	-3.08669	0.00371079	0.123678	-1.87725
MGC52498	-0.447852	8.60982	-3.08586	0.00371908	0.123732	-1.87916
CLK3	-0.429117	9.11547	-3.08509	0.0037268	0.123768	-1.88093
KLHL21	-0.412889	9.35773	-3.08407	0.00373706	0.123824	-1.88328
RASSF1	-0.387781	8.16779	-3.08286	0.00374934	0.123824	-1.88609
POU4F2	-0.144847	7.49031	-3.08283	0.00374965	0.123824	-1.88616
TMEM16B	-0.162499	7.67454	-3.08229	0.00375506	0.123824	-1.88739
MYL6	-0.27426	15.4899	-3.07981	0.0037803	0.124248	-1.89311
C4orf32	0.560338	8.07403	3.07928	0.0037857	0.124248	-1.89433
SELT	0.879201	8.31771	3.07838	0.00379483	0.124248	-1.89639
LOC399818	-0.16855	7.77397	-3.07735	0.00380536	0.124248	-1.89876
GGTA1	-0.150302	7.61077	-3.07715	0.00380745	0.124248	-1.89923
LOC401296	-0.136569	7.82311	-3.07691	0.00380991	0.124248	-1.89978
PAX1	-0.167536	7.73326	-3.07645	0.00381461	0.124248	-1.90084
GPSM2	-0.250201	8.01775	-3.07552	0.00382421	0.124344	-1.90299
NR2C2	-0.365003	8.19919	-3.07255	0.0038549	0.124928	-1.90982
CPZ	-0.16122	7.53777	-3.07207	0.00385985	0.124928	-1.91091
KLHDC7A	-0.155534	7.79004	-3.07183	0.0038623	0.124928	-1.91146
OLIG3	-0.14875	7.71467	-3.07051	0.00387605	0.125128	-1.91449
GPR21	-0.130748	7.72871	-3.0696	0.00388556	0.125128	-1.91659
ADH1B	-0.143979	7.5371	-3.06931	0.00388864	0.125128	-1.91726
GNA13	1.08093	10.6758	3.06843	0.00389782	0.125207	-1.91928
C22orf9	-0.166856	7.59247	-3.06617	0.00392158	0.125543	-1.92447
SOCS4	-0.231474	7.81215	-3.06588	0.00392466	0.125543	-1.92514
CDKN2B	-0.153907	7.53978	-3.06552	0.00392849	0.125543	-1.92598
LOC197322	-0.176726	7.72054	-3.0641	0.00394342	0.125643	-1.92922
RARSL	-0.463864	9.93639	-3.06395	0.00394509	0.125643	-1.92958
PCDHB13	-0.140245	7.52406	-3.06311	0.00395395	0.12571	-1.93149
LHFPL5	-0.131987	7.40315	-3.06244	0.00396114	0.125724	-1.93305
MCTP2	-0.564661	9.24518	-3.06049	0.0039819	0.126168	-1.93751
LOC402057	1.67472	9.25281	3.05958	0.00399161	0.126261	-1.93959
ADAMTS12	-0.143371	7.54554	-3.0576	0.00401289	0.126719	-1.94413
INSL3	-0.271844	7.88467	-3.05678	0.00402178	0.126785	-1.94602
DDX3Y	1.02629	8.29539	3.05598	0.00403041	0.126842	-1.94785
HIAT1	1.12164	8.83822	3.05393	0.00405261	0.12702	-1.95255
CXorf38	-0.552951	10.2271	-3.0538	0.00405409	0.12702	-1.95286
ARSF	-0.115531	7.46397	-3.05341	0.0040583	0.12702	-1.95375
NINJ1	-0.47375	13.1575	-3.05257	0.00406745	0.12702	-1.95567
SIX4	-0.172263	7.86183	-3.05207	0.00407297	0.12702	-1.95683
NPFFR2	-0.133126	7.71214	-3.0517	0.00407698	0.12702	-1.95767
C21orf94	-0.142644	7.61491	-3.05019	0.00409348	0.127266	-1.96112
XRN2	1.06	8.52393	3.0496	0.00410001	0.127266	-1.96248
PECR	-0.424707	8.8776	-3.0487	0.00410992	0.127266	-1.96454
TGM5	-0.127503	7.58355	-3.04849	0.00411218	0.127266	-1.96501
C16orf30	-0.557111	8.80598	-3.04612	0.00413841	0.127761	-1.97044
USP6	0.948654	8.66259	3.04581	0.0041419	0.127761	-1.97115
ZNF781	-0.151044	7.71749	-3.04302	0.00417291	0.128505	-1.97752
PHF3	0.79999	8.80966	3.0406	0.00420012	0.128747	-1.98307
CRK	-0.391741	8.83334	-3.03953	0.0042121	0.128747	-1.9855
KRT3	0.385077	8.25452	3.03952	0.00421221	0.128747	-1.98553
OTOP3	-0.118788	7.6392	-3.03865	0.0042221	0.128747	-1.98753
CR1	-0.53171	8.96598	-3.03658	0.00424555	0.128747	-1.99225
KIAA2018	-0.185921	7.57771	-3.03362	0.00427924	0.128747	-1.999
NRTN	-0.141496	7.41825	-3.03359	0.00427961	0.128747	-1.99907
psiTPTE22	-0.150299	7.55391	-3.03284	0.00428815	0.128747	-2.00078
EXOC8	0.687501	8.4038	3.03265	0.00429037	0.128747	-2.00122
BIRC3	-0.59194	8.32799	-3.03133	0.00430551	0.128747	-2.00422
NME6	-0.399266	9.17712	-3.03129	0.00430597	0.128747	-2.00431
UBE2D1	0.687651	8.16236	3.0302	0.00431854	0.128747	-2.0068
RPS6KA2	-0.342622	8.08778	-3.02871	0.00433578	0.128747	-2.0102
TGFBR2	-0.347941	8.58372	-3.02809	0.00434296	0.128747	-2.01161
MRFAP1	-0.44955	11.6671	-3.02737	0.00435137	0.128747	-2.01326
GIT2	-0.484328	9.6966	-3.02664	0.00435983	0.128747	-2.01492
C14orf11	0.923921	8.59115	3.02655	0.00436091	0.128747	-2.01513
EIF4E	0.837536	8.44873	3.02605	0.00436672	0.128747	-2.01627
FLJ22639	-0.296088	7.94562	-3.02603	0.00436696	0.128747	-2.01632
SFRS5	-0.559062	12.4541	-3.02539	0.00437447	0.128747	-2.01778
IL28B	-0.123561	7.62769	-3.02348	0.00439678	0.128747	-2.02212
TMED4	-0.611672	10.6573	-3.02294	0.00440318	0.128747	-2.02336
SPATA5L1	-0.435439	9.09744	-3.02258	0.00440738	0.128747	-2.02418
GLYATL1	-0.146314	7.76105	-3.02189	0.00441548	0.128747	-2.02574
METTL4	-0.377559	8.55473	-3.02175	0.00441717	0.128747	-2.02607
VRK3	-0.461834	10.4361	-3.02171	0.00441763	0.128747	-2.02616
KIAA1609	-0.169958	7.73733	-3.02134	0.00442198	0.128747	-2.027
LOC400120	-0.188087	8.09142	-3.0211	0.00442484	0.128747	-2.02755
OR5H15	-0.139017	7.5101	-3.02068	0.00442976	0.128747	-2.0285
SGCA	-0.140255	7.79119	-3.01993	0.00443869	0.128747	-2.03021
AQP11	-0.17936	7.52823	-3.01963	0.0044422	0.128747	-2.03089
SNAI1	-0.135673	7.42485	-3.01852	0.00445541	0.128747	-2.03342
CDCA7L	-0.34263	7.98546	-3.01811	0.00446036	0.128747	-2.03437
HSPA4L	-0.152713	7.7093	-3.01749	0.00446766	0.128747	-2.03576
SMCY	0.852936	8.22476	3.01737	0.00446916	0.128747	-2.03605
C1orf156	0.623045	7.93931	3.01692	0.0044745	0.128747	-2.03707
C1orf9	0.843613	8.44248	3.01622	0.00448282	0.128747	-2.03865
SLC16A7	-0.182962	7.72856	-3.01568	0.00448927	0.128747	-2.03988
HLA-DQB2	-0.14869	7.57849	-3.01566	0.00448958	0.128747	-2.03994
GTF2H1	0.780596	8.77598	3.01496	0.00449788	0.128747	-2.04151
COL23A1	-0.13165	7.84922	-3.01485	0.00449926	0.128747	-2.04177
NAT13	0.845238	8.92105	3.01458	0.00450251	0.128747	-2.04239
PLCB4	-0.176687	7.92081	-3.01426	0.00450637	0.128747	-2.04312
LY9	-0.465924	8.72331	-3.01403	0.00450909	0.128747	-2.04364
TPCN1	-0.194923	7.58944	-3.01386	0.00451113	0.128747	-2.04402
ADAM33	-0.143887	7.93872	-3.01338	0.00451692	0.128747	-2.04512
ADCY8	-0.14202	7.69395	-3.01294	0.00452227	0.128747	-2.04612
SSH1	-0.400042	8.88347	-3.01259	0.00452648	0.128747	-2.04692
SYT6	-0.14896	7.53356	-3.01203	0.00453319	0.128747	-2.04818
RNASE11	-0.143396	7.63485	-3.01045	0.00455238	0.128747	-2.05178
TBC1D10B	0.532951	9.68551	3.01005	0.00455718	0.128747	-2.05268
C14orf45	0.425557	8.16967	3.00984	0.00455972	0.128747	-2.05316
MGC42367	-0.507163	8.85009	-3.00921	0.00456743	0.128747	-2.0546
SMPX	-0.128023	7.50117	-3.00872	0.0045734	0.128747	-2.05571
WDR23	-0.214267	7.95681	-3.00836	0.00457774	0.128747	-2.05652
IFNA17	-0.145981	7.50144	-3.00787	0.00458374	0.128747	-2.05764
RBMXL1	0.582828	8.10256	3.00783	0.00458425	0.128747	-2.05773
STS-1	-0.445183	10.1394	-3.00774	0.00458537	0.128747	-2.05794
APH1B	-0.528537	10.049	-3.00748	0.00458847	0.128747	-2.05852
RASL11B	-0.13662	7.49817	-3.00443	0.00462597	0.129462	-2.06546
PROM1	-0.161105	7.52494	-3.00394	0.004632	0.129462	-2.06657
CNFN	-0.244943	8.22098	-3.00334	0.00463936	0.129462	-2.06792
SLC35F4	-0.119603	7.71259	-3.0026	0.00464858	0.129462	-2.06961
KIAA1632	-0.329867	8.55844	-3.00217	0.00465384	0.129462	-2.07058
LOC402176	-0.510781	8.91848	-3.00203	0.00465564	0.129462	-2.07091
SLC12A8	-0.16273	7.83256	-3.00137	0.00466382	0.129481	-2.0724
LARP4	-0.174038	8.17425	-3.00083	0.00467052	0.129481	-2.07363
C20orf107	-0.316757	8.3324	-3.00029	0.00467721	0.129481	-2.07485
RBBP4	0.838032	8.60645	2.99885	0.0046952	0.129596	-2.07812
CNKSR2	-0.139978	7.77039	-2.99873	0.00469661	0.129596	-2.07837
MYO7B	-0.212975	7.88817	-2.99801	0.00470558	0.129596	-2.08
PIP5KL1	-0.153001	7.7952	-2.99773	0.00470918	0.129596	-2.08065
CHN1	-0.350868	8.06862	-2.99632	0.0047268	0.129889	-2.08384
SHH	-0.183014	7.72591	-2.99503	0.00474306	0.130027	-2.08676
ENO2	-0.403144	8.59494	-2.99482	0.00474578	0.130027	-2.08725
UHMK1	-0.564649	9.03638	-2.9941	0.00475482	0.130084	-2.08887
MGC16291	-0.130508	7.51048	-2.99245	0.00477572	0.130284	-2.09261
ANKRD19	-0.168797	7.56778	-2.99126	0.00479085	0.130284	-2.09531
SMCR8	-0.163137	7.49738	-2.99113	0.00479251	0.130284	-2.0956
SLC10A2	-0.16897	7.60371	-2.98965	0.00481143	0.130284	-2.09896
TRA2A	-0.459588	10.2329	-2.98943	0.00481421	0.130284	-2.09945
RERE	-0.500461	10.9732	-2.98928	0.00481615	0.130284	-2.09979
GLI3	-0.162593	7.79917	-2.98666	0.0048497	0.130284	-2.10571
IPO7	-0.325903	7.932	-2.98665	0.00484984	0.130284	-2.10573
MGC4677	0.740116	8.17591	2.98614	0.00485648	0.130284	-2.1069
CKLF	-0.481825	14.017	-2.98522	0.00486833	0.130284	-2.10897
SF3B1	-0.37111	8.89312	-2.98378	0.00488689	0.130284	-2.11222
TSPAN2	0.883527	8.6362	2.98261	0.00490213	0.130284	-2.11487
FBXO9	-0.180305	7.69813	-2.98218	0.00490773	0.130284	-2.11584
HERPUD2	1.05504	9.09442	2.9821	0.00490872	0.130284	-2.11601
ARHGDIG	-0.141372	7.56285	-2.98197	0.00491052	0.130284	-2.11632
LOC442245	-0.165303	7.80706	-2.98179	0.00491287	0.130284	-2.11673
CSPG2	0.905582	12.4415	2.98165	0.00491461	0.130284	-2.11703
R3HDM1	0.672539	8.45363	2.98135	0.0049186	0.130284	-2.11772
TXNL1	0.967892	9.02108	2.98096	0.00492366	0.130284	-2.1186
SEMA5A	-0.139434	7.58116	-2.98081	0.00492562	0.130284	-2.11894
BTG2	-0.454632	10.9126	-2.9799	0.00493752	0.130284	-2.12099
NUDT9P1	-0.221179	7.57286	-2.97731	0.00497153	0.130284	-2.12684
ZNF350	-0.392127	8.87163	-2.97712	0.004974	0.130284	-2.12726
RAB3IP	-0.444302	9.35692	-2.97658	0.00498123	0.130284	-2.1285
HRBL	-0.248929	8.035	-2.97656	0.0049814	0.130284	-2.12853
CCRL2	-0.131822	7.61009	-2.9758	0.00499147	0.130284	-2.13025
PLXNC1	-0.565271	9.7023	-2.97578	0.00499171	0.130284	-2.13029
SOS1	-0.274988	8.07097	-2.97521	0.00499927	0.130284	-2.13158
ZFP64	-0.18158	7.84151	-2.97509	0.00500091	0.130284	-2.13186
RHCG	-0.160474	7.62888	-2.97467	0.00500647	0.130284	-2.13281
SYF2	-0.613315	10.1641	-2.97447	0.0050091	0.130284	-2.13325
LOC440093	0.925092	8.40924	2.9738	0.00501795	0.130284	-2.13475
TBL3	-0.210524	7.84532	-2.97371	0.00501924	0.130284	-2.13497
ARHGAP18	0.453438	8.08806	2.973	0.00502862	0.130284	-2.13656
HIST2H4A	-0.309308	8.48126	-2.97296	0.00502914	0.130284	-2.13665
DAZ2	-0.119117	7.57236	-2.97217	0.00503974	0.130284	-2.13845
SETD4	-0.270307	8.22783	-2.97211	0.00504054	0.130284	-2.13858
GPT	-0.163427	7.66029	-2.97168	0.00504619	0.130284	-2.13953
CYP2B6	-0.146138	7.55391	-2.97128	0.00505155	0.130284	-2.14044
PPP1R1A	-0.151031	7.57492	-2.97116	0.00505318	0.130284	-2.14071
C20orf98	0.297987	8.15864	2.97098	0.00505565	0.130284	-2.14113
EPC1	-0.436567	8.95713	-2.97023	0.00506566	0.130284	-2.14281
ALG13	0.741407	8.38316	2.96967	0.00507312	0.130284	-2.14407
C20orf132	0.370259	8.29726	2.96953	0.00507501	0.130284	-2.14438
DLL1	-0.188154	7.82289	-2.9694	0.0050768	0.130284	-2.14468
CRYBB2	-0.321179	8.18485	-2.9655	0.00512952	0.13092	-2.15348
MMP21	-0.149651	7.51623	-2.96452	0.00514278	0.13092	-2.15568
BANP	-0.266156	8.3872	-2.96429	0.00514596	0.13092	-2.1562
DSU	-0.162611	7.72661	-2.96423	0.0051468	0.13092	-2.15634
C15orf43	-0.137339	7.4101	-2.96422	0.00514687	0.13092	-2.15635
PAPSS1	1.00048	9.54977	2.96369	0.00515411	0.13092	-2.15755
SOHLH2	-0.141805	7.51545	-2.96347	0.00515709	0.13092	-2.15804
SFTPB	-0.13471	7.80564	-2.96342	0.0051578	0.13092	-2.15816
FOXH1	-0.12963	7.73926	-2.96265	0.00516833	0.130946	-2.15989
CNGB1	0.705789	8.63024	2.96186	0.00517912	0.130946	-2.16167
TSNAX	1.01743	8.90414	2.9618	0.00517994	0.130946	-2.1618
CSMD1	-0.276315	7.87233	-2.9601	0.00520328	0.131358	-2.16563
SLC9A4	0.282452	8.26569	2.95956	0.00521067	0.131367	-2.16684
DPH5	-0.580886	9.45065	-2.95847	0.0052257	0.131443	-2.16929
PGBD4	-0.267955	7.91999	-2.95813	0.00523049	0.131443	-2.17007
GFPT2	-0.126807	7.59437	-2.95726	0.0052425	0.131443	-2.17202
AXIN1	-0.2083	7.77075	-2.95696	0.00524666	0.131443	-2.1727
C17orf77	-0.147571	7.44103	-2.95634	0.00525524	0.131443	-2.17409
CPA3	0.510543	8.42534	2.95628	0.00525604	0.131443	-2.17422
GPHB5	-0.165269	7.92791	-2.95411	0.00528627	0.132022	-2.1791
TRIM6-TRIM34	-0.13355	7.54002	-2.95247	0.00530922	0.132418	-2.18278
CC2D1B	-0.382163	8.71785	-2.95031	0.0053396	0.132977	-2.18763
FAM102A	-0.213707	7.82387	-2.94986	0.00534591	0.132977	-2.18864
RPL37A	0.765327	14.4438	2.9489	0.00535948	0.133078	-2.1908
RFPL1S	-0.149735	7.65729	-2.94856	0.00536428	0.133078	-2.19156
PARP16	-0.338097	8.31179	-2.94774	0.00537589	0.133189	-2.1934
MCFD2	0.708621	8.54308	2.94622	0.00539744	0.133519	-2.1968
IL17D	-0.189595	8.00276	-2.9458	0.00540355	0.133519	-2.19776
TP73L	-0.161331	7.53006	-2.94429	0.005425	0.133521	-2.20113
KIAA1914	-0.251145	8.22084	-2.94426	0.0054255	0.133521	-2.20121
MGC50372	0.402146	8.41951	2.9441	0.00542772	0.133521	-2.20156
DYNC1LI1	0.778076	8.69428	2.94332	0.00543898	0.133521	-2.20332
CHST3	-0.15423	7.91704	-2.94328	0.00543946	0.133521	-2.2034
PPIG	0.794611	8.24449	2.94113	0.00547043	0.133902	-2.20822
PHKA2	-0.474805	10.6457	-2.93973	0.00549066	0.133902	-2.21136
CTAGE5	-0.127211	7.60756	-2.93956	0.00549305	0.133902	-2.21173
NYD-SP14	-0.118746	7.58837	-2.9395	0.00549393	0.133902	-2.21187
KITLG	-0.131812	7.58896	-2.93921	0.00549822	0.133902	-2.21253
TBX10	-0.159607	7.76799	-2.9391	0.00549975	0.133902	-2.21277
NPM3	-0.452226	8.77452	-2.93872	0.00550527	0.133902	-2.21362
BMP8B	1.13666	9.12103	2.93786	0.00551777	0.133968	-2.21555
RNF190	-0.143802	7.50973	-2.93754	0.00552237	0.133968	-2.21626
SURF1	-0.484736	10.0282	-2.93644	0.00553841	0.134039	-2.21873
DHRSX	-0.365464	8.47283	-2.93583	0.00554728	0.134039	-2.22009
VPS26	0.965601	9.13071	2.93583	0.00554732	0.134039	-2.22009
SCUBE3	-0.143399	7.61816	-2.93493	0.0055605	0.134039	-2.22211
NEDD4L	-0.151872	7.90938	-2.93487	0.00556134	0.134039	-2.22224
CCDC34	-0.379877	8.95703	-2.93369	0.00557863	0.134039	-2.22488
C17orf75	-0.351481	8.06317	-2.93367	0.00557903	0.134039	-2.22494
KCNK10	-0.129331	7.5822	-2.93224	0.00560004	0.134039	-2.22814
AASS	-0.134752	7.74781	-2.93201	0.00560336	0.134039	-2.22864
HMX2	-0.136714	7.64858	-2.93137	0.0056128	0.134039	-2.23007
HOXC10	0.20949	8.08737	2.93105	0.00561757	0.134039	-2.23079
FSD1NL	-0.183679	7.94521	-2.93102	0.005618	0.134039	-2.23086
STARD13	-0.164483	7.94652	-2.93096	0.00561884	0.134039	-2.23098
SLCO4A1	-0.14179	8.08372	-2.92982	0.00563571	0.13427	-2.23353
TMED8	-0.16954	7.705	-2.92748	0.00567057	0.134899	-2.23877
RPS28	1.12693	14.1097	2.92708	0.00567659	0.134899	-2.23968
LECT1	-0.183605	8.00135	-2.92568	0.00569743	0.13507	-2.24279
RIPK1	-0.411997	9.73031	-2.92562	0.0056983	0.13507	-2.24292
DUSP11	0.741529	8.63289	2.92455	0.00571443	0.135098	-2.24532
DEFB107A	-0.136909	7.8476	-2.92418	0.00571993	0.135098	-2.24614
GABARAPL1	-0.507778	10.8734	-2.92395	0.00572343	0.135098	-2.24666
OFCC1	-0.144273	7.49868	-2.92283	0.00574026	0.135098	-2.24916
MGC88374	-0.12326	7.50635	-2.92249	0.00574537	0.135098	-2.24991
ABCC2	-0.188388	7.93741	-2.92219	0.0057499	0.135098	-2.25058
OMA1	0.69571	8.54773	2.9206	0.00577403	0.135098	-2.25414
SKIP	-0.24988	8.22895	-2.92045	0.00577628	0.135098	-2.25447
C10orf27	-0.147485	7.74107	-2.91942	0.00579186	0.135098	-2.25676
FKBP9	-0.143047	7.63119	-2.91932	0.00579348	0.135098	-2.257
MITF	-0.145538	7.42384	-2.91714	0.00582664	0.135098	-2.26185
FLJ40852	-0.137126	7.92229	-2.91708	0.0058276	0.135098	-2.26199
ZNF536	-0.144093	7.57035	-2.91708	0.00582763	0.135098	-2.26199
AKR1C1	-0.116626	7.42057	-2.91648	0.00583684	0.135098	-2.26333
RSPRY1	-0.469098	11.2016	-2.91638	0.00583828	0.135098	-2.26354
CD3G	-0.733559	9.49956	-2.91557	0.00585083	0.135098	-2.26537
PIK3AP1	1.12177	10.1671	2.91536	0.00585394	0.135098	-2.26582
LOC441743	1.04203	9.15306	2.91512	0.00585759	0.135098	-2.26635
RAD51L3	-0.148871	7.64484	-2.91502	0.00585916	0.135098	-2.26657
SELPLG	-0.702093	10.1835	-2.91407	0.0058739	0.135098	-2.26871
TTC1	-0.416049	9.69275	-2.91387	0.00587686	0.135098	-2.26914
TMEM47	-0.17271	7.79592	-2.91373	0.00587905	0.135098	-2.26945
C14orf121	-0.154833	8.04285	-2.91347	0.00588304	0.135098	-2.27003
LOC92196	-0.131035	7.55247	-2.91329	0.00588581	0.135098	-2.27043
IMAA	-0.205771	7.72493	-2.91323	0.00588686	0.135098	-2.27058
LOC92691	-0.237716	8.09416	-2.91267	0.00589537	0.135098	-2.27181
C3orf40	-0.41636	8.91228	-2.9124	0.00589964	0.135098	-2.27242
LSM6	0.948523	8.90941	2.91177	0.00590943	0.135098	-2.27383
SLC35E2	-0.176431	7.88711	-2.91174	0.00590978	0.135098	-2.27388
FAM55A	-0.130732	7.57051	-2.911	0.00592132	0.135152	-2.27554
POLR2J2	-0.263922	8.25712	-2.91066	0.00592662	0.135152	-2.2763
ODZ1	-0.142764	7.49277	-2.90928	0.00594813	0.135476	-2.27938
FLJ27465	-0.144551	7.88284	-2.90822	0.00596457	0.135544	-2.28172
SFRS14	-0.30863	8.1676	-2.90816	0.00596563	0.135544	-2.28187
RAB23	-0.132964	7.45461	-2.90685	0.00598608	0.135799	-2.28478
FAM48A	-0.418534	9.72674	-2.90629	0.00599493	0.135799	-2.28603
CST8	-0.139362	7.50755	-2.90561	0.00600553	0.135799	-2.28753
ADIPOR2	-0.511201	10.1646	-2.9055	0.00600735	0.135799	-2.28779
LYPLA1	0.822345	8.13817	2.90512	0.00601331	0.135799	-2.28863
IFI6	-1.0851	10.939	-2.90465	0.00602069	0.135801	-2.28967
LOC400965	-0.154519	7.69813	-2.903	0.00604682	0.135972	-2.29335
SLBP	1.02144	9.89696	2.90297	0.00604715	0.135972	-2.2934
RDH5	-0.439717	9.03494	-2.90182	0.00606546	0.135972	-2.29596
AACS	-0.222651	8.1912	-2.90116	0.00607592	0.135972	-2.29743
RPS3	-0.484531	15.0127	-2.90105	0.00607772	0.135972	-2.29768
PKD1	-0.157667	8.00891	-2.90098	0.00607885	0.135972	-2.29784
SCRIB	-0.133782	7.84661	-2.90056	0.00608542	0.135972	-2.29875
ITM2A	1.07127	8.77354	2.90049	0.00608665	0.135972	-2.29893
ZNF238	-0.165557	7.61571	-2.89938	0.00610434	0.136057	-2.30139
GNAT1	-0.137422	7.78096	-2.89933	0.00610505	0.136057	-2.30149
CSDE1	-0.37636	8.67908	-2.89758	0.00613308	0.136408	-2.30538
DOCK6	-0.147178	7.62997	-2.89744	0.00613546	0.136408	-2.30571
CDH20	-0.139054	7.8107	-2.89599	0.00615865	0.136601	-2.30891
CXorf21	0.842111	8.51582	2.89581	0.00616153	0.136601	-2.30931
RBAK	-0.231328	7.86201	-2.89527	0.00617027	0.136601	-2.31051
WSB2	0.932453	9.51166	2.89485	0.00617703	0.136601	-2.31144
ADCY4	-0.365687	8.61108	-2.89462	0.00618082	0.136601	-2.31196
CKAP2	0.613795	8.50948	2.89307	0.00620594	0.136994	-2.3154
FLJ21127	-0.353971	8.593	-2.89195	0.00622405	0.137189	-2.31787
DPF3	-0.136475	7.6811	-2.89162	0.00622952	0.137189	-2.31862
SSX6	-0.142729	7.70555	-2.89044	0.00624871	0.137266	-2.32123
SFRS11	1.20703	9.7369	2.88894	0.0062732	0.137266	-2.32455
HTR4	-0.135582	7.86466	-2.88889	0.00627401	0.137266	-2.32466
SPATA13	-0.670638	9.32171	-2.88879	0.00627568	0.137266	-2.32488
C22orf15	-0.145182	7.81334	-2.88769	0.00629379	0.137266	-2.32733
NAT11	-0.212392	7.78293	-2.88765	0.00629436	0.137266	-2.32741
MTNR1B	-0.128212	7.60115	-2.88738	0.00629888	0.137266	-2.32802
CGB	-0.159303	7.82623	-2.88736	0.00629919	0.137266	-2.32806
C20orf74	-0.218633	7.79854	-2.88735	0.00629933	0.137266	-2.32808
C16orf69	0.720505	8.37186	2.88572	0.00632626	0.13763	-2.3317
TAF9B	-0.13512	7.55094	-2.88544	0.00633079	0.13763	-2.3323
TMEM45B	-0.494882	8.57022	-2.88397	0.00635512	0.137998	-2.33556
CASP10	-0.215218	8.07057	-2.88346	0.00636359	0.137998	-2.33669
C10orf132	-0.236692	7.73535	-2.88308	0.00636992	0.137998	-2.33753
AGMAT	-0.348897	8.07972	-2.88182	0.00639086	0.138003	-2.34032
ITPKB	-0.448459	10.1255	-2.88135	0.00639871	0.138003	-2.34136
TGFBRAP1	-0.409423	8.35101	-2.88133	0.00639911	0.138003	-2.34141
TMEM63A	-0.485721	9.03515	-2.88098	0.00640493	0.138003	-2.34218
BRWD2	0.90527	8.82975	2.88085	0.00640719	0.138003	-2.34248
CYB561	0.424512	8.15978	2.87982	0.00642429	0.138211	-2.34474
NPHP1	-0.113942	7.53787	-2.87902	0.00643776	0.138341	-2.34652
THOC5	-0.44427	9.84631	-2.87854	0.00644577	0.138354	-2.34757
LOC158381	-0.148883	7.90122	-2.87806	0.00645398	0.138371	-2.34865
POLB	-0.534042	11.0385	-2.8765	0.00648026	0.138774	-2.3521
RNPC2	0.666042	8.16174	2.87434	0.00651687	0.139384	-2.35688
KIAA0355	-0.525766	10.0081	-2.87353	0.00653058	0.139384	-2.35866
C17orf69	-0.279211	7.73639	-2.8735	0.00653116	0.139384	-2.35873
CDY1	-0.138295	7.55946	-2.87182	0.00655965	0.139464	-2.36243
MRE11A	-0.210593	7.84267	-2.87146	0.00656588	0.139464	-2.36323
MBTPS2	-0.17613	7.72347	-2.87123	0.00656981	0.139464	-2.36374
INSL6	-0.114696	7.51652	-2.87103	0.00657326	0.139464	-2.36418
ANKRD39	-0.308112	8.47498	-2.87058	0.00658097	0.139464	-2.36518
ZBTB12	-0.137986	7.53179	-2.87044	0.00658342	0.139464	-2.36549
TCEAL2	-0.215098	7.78396	-2.87021	0.00658731	0.139464	-2.36599
CEACAM3	-0.519541	9.50128	-2.86975	0.00659527	0.139474	-2.36702
C21orf49	-0.140744	7.61216	-2.86853	0.00661615	0.139749	-2.3697
IRF2	0.642763	8.23503	2.86748	0.00663429	0.139749	-2.37202
NOS3	-0.145427	7.62406	-2.86704	0.00664183	0.139749	-2.37298
C1orf187	-0.273908	8.026	-2.86685	0.00664517	0.139749	-2.37341
LGR7	-0.130894	7.4531	-2.86644	0.00665227	0.139749	-2.37431
CHRNA3	-0.174511	7.8609	-2.86638	0.00665328	0.139749	-2.37444
NAV3	-0.149828	7.87839	-2.86533	0.00667156	0.139769	-2.37677
ERBB4	-0.207564	8.31202	-2.86461	0.00668409	0.139769	-2.37836
ENPP1	-0.168105	7.98092	-2.86446	0.00668658	0.139769	-2.37868
ZFP36L1	1.03173	12.5475	2.86433	0.00668887	0.139769	-2.37897
SLC37A3	-0.354285	8.16675	-2.86406	0.00669356	0.139769	-2.37956
TEP1	-0.184561	7.6668	-2.8634	0.00670505	0.139769	-2.38101
SPCS2	0.728485	8.10459	2.86244	0.00672176	0.139769	-2.38312
LOC653709	0.687052	8.53408	2.86195	0.00673049	0.139769	-2.38422
ADIPOR1	0.585108	12.8235	2.86168	0.00673506	0.139769	-2.3848
USP8	0.933301	9.93049	2.86137	0.00674048	0.139769	-2.38548
FLJ23191	-0.136867	7.40936	-2.86136	0.00674076	0.139769	-2.38552
CARD8	-0.427141	11.3468	-2.86116	0.00674424	0.139769	-2.38595
ZSWIM3	-0.202857	7.70413	-2.8605	0.00675578	0.139847	-2.3874
ADH4	0.572623	8.14955	2.86009	0.00676304	0.139847	-2.38831
SULT1A2	-0.147299	7.78052	-2.85923	0.00677811	0.139849	-2.3902
BCL11A	-0.220605	7.81922	-2.85872	0.00678723	0.139849	-2.39134
HTRA3	-0.141356	7.59629	-2.85838	0.00679308	0.139849	-2.39207
PAK1	-0.42459	11.0008	-2.85826	0.00679533	0.139849	-2.39235
RHPN2	-0.189694	7.78417	-2.85746	0.0068095	0.139849	-2.39411
MYLC2PL	-0.130428	7.56032	-2.85731	0.0068121	0.139849	-2.39444
MAGEC3	-0.140908	7.56135	-2.85711	0.00681569	0.139849	-2.39488
NYD-SP18	-0.130243	7.42589	-2.85625	0.00683093	0.140008	-2.39678
BCL2A1	1.18303	9.17815	2.85436	0.00686439	0.140458	-2.40092
GDF15	-0.140857	7.70202	-2.85374	0.00687547	0.140458	-2.40228
IL9	-0.136675	7.57895	-2.8537	0.00687623	0.140458	-2.40238
MAP1LC3A	-0.118127	7.45058	-2.85271	0.00689398	0.140458	-2.40456
UPK1A	-0.14262	7.72639	-2.85243	0.00689892	0.140458	-2.40517
CYP2B7P1	-0.131586	7.51236	-2.85218	0.00690337	0.140458	-2.40571
COMMD8	0.942151	8.69361	2.85205	0.00690569	0.140458	-2.406
PAK2	-0.694564	9.45356	-2.85051	0.00693348	0.140501	-2.4094
TRAF6	-0.133482	7.57057	-2.85041	0.00693529	0.140501	-2.40962
ENTPD4	-0.451746	9.51261	-2.85038	0.0069358	0.140501	-2.40969
KRTAP19-7	-0.124124	7.7804	-2.85007	0.00694134	0.140501	-2.41036
TMEM2	-0.4778	9.84881	-2.84984	0.0069455	0.140501	-2.41087
TAS2R45	-0.13664	7.55301	-2.84659	0.00700435	0.14143	-2.41802
LOC339745	0.988662	9.14983	2.84646	0.00700661	0.14143	-2.41829
DNAL1	-0.137997	7.59589	-2.84306	0.00706866	0.1423	-2.42576
ZNF491	-0.137067	7.71802	-2.84294	0.00707093	0.1423	-2.42603
ZNF286	-0.255627	7.8782	-2.84285	0.00707259	0.1423	-2.42623
XRCC4	0.416219	7.81486	2.84141	0.00709895	0.142416	-2.42938
OR10W1	-0.154711	7.75631	-2.84129	0.00710108	0.142416	-2.42963
NUDT21	0.574814	8.04697	2.84089	0.00710847	0.142416	-2.43051
PPM2C	0.701366	8.50142	2.8403	0.00711936	0.142416	-2.43181
C6orf60	-0.184353	7.76802	-2.83955	0.00713325	0.142416	-2.43346
HMGB3	-0.154368	7.81329	-2.83952	0.00713389	0.142416	-2.43354
VPS53	-0.273285	8.03178	-2.83925	0.00713886	0.142416	-2.43413
EFCBP1	-0.134005	7.44439	-2.83921	0.00713951	0.142416	-2.4342
NDUFA5	0.678936	8.01362	2.83819	0.00715836	0.142557	-2.43644
CSPP1	-0.190975	7.83101	-2.83771	0.0071673	0.142557	-2.43749
HMFN0839	-0.557071	10.7531	-2.83759	0.00716953	0.142557	-2.43776
LHX1	-0.149883	7.7612	-2.83569	0.0072049	0.142906	-2.44192
MTA3	-0.231008	7.91849	-2.83521	0.00721379	0.142906	-2.44297
LRRTM3	-0.15076	7.55157	-2.83506	0.00721665	0.142906	-2.4433
PKHD1L1	-0.161503	7.78528	-2.83453	0.0072265	0.142906	-2.44446
POM121	-0.153507	7.6789	-2.83403	0.00723591	0.142906	-2.44556
YIPF4	0.743199	8.24152	2.83387	0.00723885	0.142906	-2.4459
ERCC4	-0.178194	7.83737	-2.83377	0.0072408	0.142906	-2.44613
TTC18	-0.184042	7.89517	-2.83226	0.00726908	0.143079	-2.44943
LIPG	-0.138342	7.4424	-2.83196	0.00727475	0.143079	-2.45009
DMXL1	0.622929	8.17634	2.83176	0.00727851	0.143079	-2.45053
TTTY11	-0.134921	7.79637	-2.83167	0.00728028	0.143079	-2.45073
ZFX	-0.401925	8.34597	-2.83124	0.00728837	0.143087	-2.45167
OR4B1	-0.143077	7.69401	-2.8297	0.00731741	0.143506	-2.45504
RRAGC	-0.396903	10.0474	-2.82889	0.0073327	0.143581	-2.45681
JAZF1	0.558144	10.16	2.82868	0.00733664	0.143581	-2.45726
MYO9A	-0.306569	8.68289	-2.82826	0.00734465	0.143587	-2.45818
ITPKA	-0.139203	7.64178	-2.82782	0.0073531	0.143601	-2.45916
ZD52F10	-0.133289	7.6173	-2.82684	0.00737174	0.143607	-2.4613
ATP6V1C2	-0.145216	7.56361	-2.82666	0.00737513	0.143607	-2.46169
ANKK1	-0.162048	7.48589	-2.82652	0.00737778	0.143607	-2.46199
MGC11102	0.613144	8.18453	2.82557	0.00739587	0.143607	-2.46407
CACNG6	0.323665	8.1651	2.82547	0.00739785	0.143607	-2.46429
DSC2	0.695588	10.1318	2.82537	0.00739967	0.143607	-2.4645
SP110	-0.529828	12.9311	-2.82445	0.00741746	0.143738	-2.46653
NDUFA11	-0.490118	11.0981	-2.82408	0.00742438	0.143738	-2.46732
NRAP	-0.114402	7.45018	-2.82376	0.00743055	0.143738	-2.46802
DDX42	-0.122155	7.55066	-2.82307	0.00744379	0.143738	-2.46953
ZNF133	-0.298575	8.24303	-2.8224	0.00745679	0.143738	-2.47101
MICAL1	-0.450988	10.2513	-2.82181	0.00746818	0.143738	-2.4723
OCIAD2	-0.640963	10.6494	-2.82143	0.0074754	0.143738	-2.47312
WDFY2	-0.418558	9.96728	-2.82128	0.00747835	0.143738	-2.47345
TMPRSS11A	-0.14198	7.61526	-2.82081	0.00748747	0.143738	-2.47448
SOX9	-0.118862	7.58208	-2.82077	0.00748823	0.143738	-2.47457
F7	-0.124984	7.36184	-2.81995	0.00750405	0.143738	-2.47635
CYLC2	-0.200046	8.09995	-2.81987	0.00750551	0.143738	-2.47652
GALNT4	-0.499851	9.23066	-2.81967	0.00750941	0.143738	-2.47696
MPP7	-0.270425	8.09997	-2.81942	0.00751438	0.143738	-2.47752
FARSB	-0.147549	7.7496	-2.81838	0.00753461	0.143911	-2.47979
PIGF	-0.191258	7.79732	-2.81815	0.00753891	0.143911	-2.48027
MGC35308	-0.15803	7.96227	-2.81684	0.00756459	0.144153	-2.48315
HCCS	0.623637	8.39132	2.81671	0.00756703	0.144153	-2.48342
MPHOSPH10	0.534935	7.93334	2.81498	0.00760088	0.144335	-2.4872
PCSK4	-0.130451	7.66994	-2.81469	0.00760666	0.144335	-2.48784
ZSWIM1	-0.344431	9.57535	-2.81447	0.00761088	0.144335	-2.48831
LOC389429	-0.121103	7.45775	-2.81345	0.00763099	0.144335	-2.49054
ADAM29	-0.147086	7.7161	-2.81196	0.00766026	0.144335	-2.49378
NUP214	-0.479162	12.9817	-2.81144	0.0076706	0.144335	-2.49492
FBLN2	-0.124145	7.43226	-2.81045	0.00769026	0.144335	-2.49708
SFRS3	0.693239	8.06217	2.81035	0.00769211	0.144335	-2.49729
KRTAP5-3	-0.148393	7.50519	-2.81019	0.00769538	0.144335	-2.49765
ANAPC4	-0.500844	9.95165	-2.80998	0.00769957	0.144335	-2.49811
NBL1	-0.379453	7.86307	-2.80945	0.00770998	0.144335	-2.49925
MYH6	-0.138127	7.76309	-2.80901	0.00771869	0.144335	-2.5002
AXUD1	-0.509001	10.9837	-2.80859	0.00772712	0.144335	-2.50113
PPP3CA	0.88283	9.21436	2.80856	0.00772761	0.144335	-2.50118
ATAD3C	-0.143439	7.85328	-2.80815	0.00773594	0.144335	-2.50209
GJB3	-0.120212	7.56175	-2.80804	0.0077381	0.144335	-2.50233
TSPY1	-0.119046	7.34202	-2.80786	0.00774166	0.144335	-2.50272
TSN	0.528019	8.08848	2.80756	0.00774765	0.144335	-2.50337
FLJ45831	-0.135304	7.57956	-2.80732	0.00775234	0.144335	-2.50388
PAK1IP1	0.571867	8.28242	2.80652	0.00776846	0.144335	-2.50564
PCNXL2	-0.174976	7.68259	-2.80643	0.0077703	0.144335	-2.50584
FANK1	-0.153537	7.79271	-2.80602	0.0077785	0.144335	-2.50673
PPYR1	-0.124192	7.55559	-2.80596	0.00777962	0.144335	-2.50685
RPL23AP7	0.841017	10.0649	2.8056	0.0077869	0.144335	-2.50764
BOK	0.458982	8.57443	2.8054	0.00779078	0.144335	-2.50807
STAR	-0.0994515	7.4902	-2.80536	0.00779169	0.144335	-2.50816
FFAR2	-0.767368	12.6122	-2.8052	0.00779483	0.144335	-2.5085
IL6R	-0.377152	9.76969	-2.80488	0.0078013	0.144335	-2.50921
CBX3	0.552244	8.8312	2.80427	0.00781349	0.144335	-2.51053
CNN3	-0.211307	7.83718	-2.80421	0.00781481	0.144335	-2.51067
DDX52	-0.179515	7.69768	-2.80411	0.00781676	0.144335	-2.51088
TRPV4	-0.149075	7.67113	-2.80208	0.00785766	0.144947	-2.51529
ADORA2A	-0.488267	9.8325	-2.8014	0.00787143	0.145057	-2.51677
HOOK1	-0.269814	8.29657	-2.80097	0.00788022	0.145075	-2.51771
SH3BP5L	-0.41661	9.70403	-2.79958	0.00790836	0.145218	-2.52073
OSAP	-0.154664	7.58295	-2.79937	0.00791262	0.145218	-2.52118
RCC1	-0.147549	7.61153	-2.799	0.00792026	0.145218	-2.522
GIOT-1	-0.143986	7.67926	-2.7988	0.00792436	0.145218	-2.52244
DGUOK	-0.452762	11.6602	-2.79867	0.00792695	0.145218	-2.52271
LOC388915	-0.129596	7.35881	-2.79712	0.00795859	0.145403	-2.52608
FLJ36748	-0.13606	7.82444	-2.79668	0.00796754	0.145403	-2.52703
PPAN	-0.300827	8.14657	-2.7964	0.00797336	0.145403	-2.52765
FLJ10986	-0.339076	8.78531	-2.7963	0.00797526	0.145403	-2.52785
HSD17B6	-0.142356	7.66377	-2.79604	0.00798075	0.145403	-2.52843
TMEM1	-0.256329	8.28127	-2.79524	0.00799716	0.145403	-2.53016
EXOC4	-0.337361	8.30449	-2.79439	0.00801467	0.145403	-2.53201
DCTN6	0.526445	8.08949	2.7943	0.00801637	0.145403	-2.53219
LOC136306	-0.143032	7.50015	-2.79416	0.00801935	0.145403	-2.53251
PVRL1	-0.144966	7.63872	-2.79369	0.00802895	0.145403	-2.53352
CDK5R2	-0.118752	7.6181	-2.79325	0.00803811	0.145403	-2.53448
BAGE3	-0.157623	7.73503	-2.79321	0.00803898	0.145403	-2.53457
SLIC1	-0.240643	8.13213	-2.79295	0.0080444	0.145403	-2.53514
C8orf31	-0.162412	7.70469	-2.79285	0.0080463	0.145403	-2.53534
CDYL2	-0.128168	7.81597	-2.79152	0.00807397	0.145762	-2.53824
C20orf43	-0.397289	12.8358	-2.78971	0.00811142	0.146004	-2.54215
C20orf71	-0.14265	7.76186	-2.78952	0.00811551	0.146004	-2.54258
GATS	-0.494695	10.0329	-2.78909	0.00812439	0.146004	-2.5435
C6orf143	-0.13225	7.54855	-2.78904	0.00812551	0.146004	-2.54362
EPHA5	-0.126021	7.36815	-2.78865	0.00813358	0.146004	-2.54446
JMJD2C	-0.221417	7.86684	-2.78861	0.00813443	0.146004	-2.54454
BCL6	-0.603651	13.6795	-2.788	0.00814723	0.146093	-2.54587
KIAA1191	-0.50555	9.94057	-2.78647	0.00817927	0.146527	-2.54919
OR2C3	-0.161993	7.59368	-2.78514	0.00820722	0.146851	-2.55207
SUPV3L1	-0.380349	8.60884	-2.78486	0.00821314	0.146851	-2.55268
PHC2	-0.168985	7.75983	-2.78253	0.00826224	0.147049	-2.55771
MCF2L	-0.126911	7.53624	-2.78106	0.00829348	0.147049	-2.5609
HBD	0.725256	14.6676	2.78104	0.00829403	0.147049	-2.56095
TINAG	-0.159708	7.76809	-2.78103	0.00829415	0.147049	-2.56097
HYI	-0.156329	7.81374	-2.78079	0.00829931	0.147049	-2.56149
MYOD1	-0.122216	7.57748	-2.78046	0.00830635	0.147049	-2.56221
MAEL	-0.115636	7.43986	-2.78028	0.0083102	0.147049	-2.5626
CCDC91	0.616403	8.18404	2.78002	0.00831554	0.147049	-2.56314
GGN	-0.133274	7.48296	-2.77974	0.00832155	0.147049	-2.56375
ZNF767	-0.37131	9.15899	-2.77902	0.00833697	0.147049	-2.56532
ARHGEF19	-0.301081	8.36567	-2.77848	0.00834859	0.147049	-2.56649
FOXJ2	-0.39105	10.9524	-2.77819	0.00835468	0.147049	-2.56711
AHCTF1	-0.395901	9.55311	-2.77819	0.00835482	0.147049	-2.56712
DHDH	-0.20386	7.87158	-2.77805	0.00835774	0.147049	-2.56742
ZNF80	-0.204373	7.87463	-2.77787	0.00836157	0.147049	-2.5678
HGS	-0.431295	11.5549	-2.77765	0.00836621	0.147049	-2.56827
LOC348645	-0.488734	8.49645	-2.77737	0.0083722	0.147049	-2.56888
ABHD11	-0.23316	7.8821	-2.77642	0.00839262	0.147049	-2.57093
KIAA1909	-0.126169	7.38132	-2.77633	0.00839456	0.147049	-2.57113
CDS2	-0.425463	9.99962	-2.77633	0.00839466	0.147049	-2.57114
WWC2	-0.144947	7.65555	-2.776	0.00840164	0.147049	-2.57184
MSX1	-0.134859	7.387	-2.77579	0.00840626	0.147049	-2.5723
SIM1	-0.127186	7.50676	-2.77541	0.00841442	0.147049	-2.57312
PPP3CB	-0.516313	10.8339	-2.77497	0.00842386	0.147049	-2.57407
CHMP2A	-0.378802	10.2338	-2.77489	0.00842552	0.147049	-2.57424
SEC23A	0.706685	8.0238	2.77469	0.00842995	0.147049	-2.57468
C1orf177	-0.131108	7.81329	-2.77435	0.00843729	0.147049	-2.57541
LOC400891	-0.12531	7.54186	-2.77289	0.00846891	0.147462	-2.57857
NOTUM	-0.129777	7.65559	-2.77222	0.00848335	0.147484	-2.58001
USP40	-0.138566	7.77869	-2.7721	0.00848599	0.147484	-2.58027
GLCCI1	-0.297005	8.194	-2.77064	0.00851773	0.147897	-2.58342
ALDOA	-0.139445	7.8156	-2.76946	0.00854341	0.148082	-2.58597
CHRNA2	-0.185415	7.96405	-2.76943	0.00854427	0.148082	-2.58605
EIF2C4	-0.341107	9.30074	-2.76827	0.00856964	0.148383	-2.58855
FAM126B	0.732414	8.26515	2.7679	0.00857758	0.148383	-2.58933
LCN8	-0.161065	7.55294	-2.76721	0.00859273	0.148388	-2.59082
RPL23	1.24987	13.1134	2.76681	0.00860154	0.148388	-2.59169
APOBEC3A	1.25395	10.9615	2.76638	0.00861113	0.148388	-2.59263
AP1GBP1	-0.234148	8.04763	-2.7661	0.00861724	0.148388	-2.59323
CLTC	0.610143	8.57714	2.76608	0.00861766	0.148388	-2.59327
OR5T3	-0.127023	7.59661	-2.76469	0.00864838	0.148709	-2.59627
ZNF467	-0.598927	11.8366	-2.76451	0.00865225	0.148709	-2.59665
C17orf48	-0.423728	8.98824	-2.76402	0.00866316	0.14871	-2.59771
ICA1	-0.32145	8.36245	-2.76379	0.00866833	0.14871	-2.59821
OR10J1	-0.159546	7.85452	-2.76311	0.00868343	0.148714	-2.59968
CTF8	-0.214847	7.95941	-2.7627	0.00869238	0.148714	-2.60055
LOC124751	-0.183495	7.6685	-2.76238	0.00869947	0.148714	-2.60124
ALLC	-0.151272	7.72547	-2.76234	0.00870046	0.148714	-2.60134
UGT2B7	-0.15363	7.55334	-2.7619	0.00871019	0.148744	-2.60228
DGKZ	-0.166542	7.67203	-2.76079	0.00873494	0.149026	-2.60467
SFRP1	-0.176237	7.6306	-2.76044	0.00874272	0.149026	-2.60542
STK19	-0.341833	9.13398	-2.75914	0.00877185	0.149386	-2.60823
SPERT	-0.161005	7.82856	-2.75793	0.008799	0.149712	-2.61084
CHMP6	-0.229071	7.81942	-2.75665	0.00882777	0.149785	-2.61359
ZNF187	-0.148409	7.70479	-2.75616	0.00883866	0.149785	-2.61463
C20orf165	-0.12927	7.55557	-2.75604	0.00884146	0.149785	-2.6149
ZNHIT3	-0.131535	7.69236	-2.75579	0.00884702	0.149785	-2.61543
LMX1A	-0.140048	7.43184	-2.75567	0.00884975	0.149785	-2.61569
NR1D1	0.358416	8.33647	2.75559	0.00885156	0.149785	-2.61586
CHST7	-0.454691	10.4467	-2.75472	0.0088714	0.149875	-2.61775
HOXD3	-0.194965	8.27804	-2.75465	0.00887293	0.149875	-2.61789
SFT2D1	-0.516967	12.3877	-2.75278	0.00891522	0.150304	-2.6219
ATP8A2	-0.112921	7.92849	-2.75251	0.00892133	0.150304	-2.62248
LIPE	-0.136397	7.84225	-2.75246	0.00892255	0.150304	-2.6226
CLEC2B	-0.538193	9.39507	-2.75175	0.00893876	0.150372	-2.62413
LOC492303	-0.113995	7.52407	-2.75157	0.00894276	0.150372	-2.6245
NOL9	-0.221545	7.92353	-2.75096	0.00895674	0.150472	-2.62582
TMEM54	-0.11594	7.6041	-2.74912	0.00899887	0.150944	-2.62978
AQP2	-0.118901	7.60558	-2.74848	0.00901347	0.150944	-2.63115
GIMAP1	0.935719	10.0541	2.74836	0.00901634	0.150944	-2.63141
FLJ11712	0.982292	9.58634	2.74795	0.00902578	0.150944	-2.6323
FAM49B	1.18681	11.0666	2.74699	0.00904791	0.150944	-2.63436
TMPRSS3	-0.114139	7.54014	-2.74695	0.00904885	0.150944	-2.63445
UNQ846	-0.232396	8.19315	-2.74692	0.00904945	0.150944	-2.6345
PAPPA	-0.123076	7.44117	-2.74655	0.00905794	0.150944	-2.6353
UFM1	0.853959	9.05116	2.74652	0.00905866	0.150944	-2.63536
ATG3	0.575454	8.74747	2.74621	0.00906586	0.150944	-2.63603
RNF185	-0.256321	8.30509	-2.74555	0.00908102	0.150957	-2.63744
LOC387775	-0.130308	7.52358	-2.74544	0.00908357	0.150957	-2.63768
UGT1A8	-0.125354	7.59768	-2.74479	0.0090987	0.150957	-2.63908
SPINK5L2	-0.11953	7.57425	-2.744	0.00911689	0.150957	-2.64076
FAM51A1	-0.274474	7.90223	-2.74392	0.00911879	0.150957	-2.64094
HNRPC	0.9334	10.1399	2.74263	0.00914887	0.150957	-2.64371
OTX1	-0.376016	8.01765	-2.74258	0.00914995	0.150957	-2.64381
PRO0149	-0.475721	10.7256	-2.74257	0.0091501	0.150957	-2.64383
KSR2	-0.138862	7.47317	-2.74232	0.00915609	0.150957	-2.64438
OR10C1	-0.120091	7.48699	-2.74226	0.00915747	0.150957	-2.64451
KIAA1604	0.558674	8.12189	2.74205	0.00916244	0.150957	-2.64496
ZNF423	-0.123358	7.51587	-2.74198	0.00916389	0.150957	-2.6451
OR4K5	-0.132733	7.59503	-2.74113	0.00918381	0.151152	-2.64693
DGKK	-0.114785	7.52503	-2.73981	0.00921474	0.151234	-2.64976
HLA-DRB6	0.749705	11.2318	2.73976	0.00921596	0.151234	-2.64987
C2orf13	-0.144418	7.55713	-2.73953	0.00922137	0.151234	-2.65037
RGPD5	-0.129646	7.82706	-2.73936	0.00922534	0.151234	-2.65073
C17orf68	-0.365105	8.48678	-2.73918	0.00922941	0.151234	-2.6511
LOC203413	-0.126856	7.59024	-2.73808	0.00925523	0.151524	-2.65346
KLK6	-0.140995	7.67921	-2.73729	0.00927399	0.151685	-2.65516
DNTTIP2	0.665497	8.089	2.73698	0.00928135	0.151685	-2.65583
SLC45A4	-0.472729	9.6958	-2.7366	0.00929031	0.151698	-2.65664
TBX15	-0.135054	7.65456	-2.73521	0.00932316	0.152101	-2.65962
MAPK1	-0.304394	8.36261	-2.7341	0.00934946	0.152397	-2.66199
ALS2CR15	-0.163469	7.56599	-2.73205	0.00939833	0.15306	-2.66638
SECISBP2	-0.417939	10.0558	-2.73167	0.00940729	0.153072	-2.66719
PMS2CL	-0.172458	7.89174	-2.73129	0.00941654	0.153089	-2.66801
MESDC2	-0.126574	7.50802	-2.7302	0.00944254	0.153373	-2.67034
UBE1C	0.750805	8.94261	2.72987	0.00945051	0.153373	-2.67105
C4orf36	-0.139031	7.64647	-2.72915	0.00946783	0.153521	-2.67259
SMC3	0.600665	8.20582	2.72788	0.00949826	0.153567	-2.67529
FLJ41821	-0.124819	7.42165	-2.72741	0.00950962	0.153567	-2.6763
PDE4C	-0.11862	7.58869	-2.72725	0.00951354	0.153567	-2.67665
NALP12	-0.414812	11.9898	-2.7268	0.00952429	0.153567	-2.6776
TLR6	-0.422426	9.22438	-2.72667	0.0095275	0.153567	-2.67788
RRH	-0.123777	7.46936	-2.72616	0.00953995	0.153567	-2.67898
MCC	-0.134704	7.75903	-2.72587	0.00954676	0.153567	-2.67958
FLJ45256	0.717827	8.70758	2.72577	0.00954939	0.153567	-2.67981
GGTL3	-0.189535	7.75203	-2.72541	0.00955808	0.153567	-2.68058
TXNDC12	-0.423021	11.8979	-2.72522	0.00956265	0.153567	-2.68098
ATP6V1E1	-0.419719	12.1516	-2.72518	0.00956368	0.153567	-2.68107
SH3BP5	-0.136141	7.55713	-2.7249	0.0095705	0.153567	-2.68167
RPS6KL1	-0.165538	8.02147	-2.72459	0.00957785	0.153567	-2.68232
OR4M1	-0.119813	7.47323	-2.72343	0.00960621	0.153769	-2.68481
BIN2	0.810559	9.3538	2.7234	0.00960692	0.153769	-2.68487
SMAP	0.509589	8.23106	2.72281	0.00962133	0.153867	-2.68613
PHC3	-0.280877	7.98119	-2.7213	0.00965807	0.153995	-2.68934
NT5DC1	0.521998	8.20463	2.72117	0.00966122	0.153995	-2.68962
PPP2R2A	-0.406557	10.108	-2.72101	0.00966515	0.153995	-2.68996
KLK10	-0.152503	7.77767	-2.72056	0.00967624	0.153995	-2.69093
AKT2	-0.230145	7.80672	-2.72052	0.00967723	0.153995	-2.69101
PIGG	-0.259859	8.18244	-2.72007	0.00968837	0.153995	-2.69198
STX16	-0.515414	12.3949	-2.72005	0.00968884	0.153995	-2.69202
ALDH8A1	-0.127827	7.51852	-2.71964	0.00969886	0.153995	-2.69289
PTPRB	-0.136851	7.51084	-2.71944	0.00970371	0.153995	-2.69331
OR2M4	-0.113947	7.63171	-2.71854	0.00972586	0.154215	-2.69523
YBX1	0.505411	12.4521	2.71804	0.00973815	0.154278	-2.69629
KLHL8	-0.536846	10.7556	-2.71717	0.00975977	0.15449	-2.69816
FLJ38964	-0.551989	9.83947	-2.71515	0.0098098	0.15515	-2.70246
PVR	-0.164379	7.96955	-2.71312	0.00986026	0.155709	-2.70678
APH1A	-0.454136	10.8596	-2.71306	0.0098619	0.155709	-2.70692
FRAS1	-0.109742	7.50932	-2.71074	0.00992	0.156454	-2.71187
ALDH1A1	0.794202	9.46038	2.71031	0.0099306	0.156454	-2.71277
SLC6A20	-0.116476	7.67766	-2.71017	0.00993423	0.156454	-2.71307
C20orf35	-0.467454	9.46553	-2.70946	0.00995203	0.156476	-2.71458
MGC10993	-0.217096	8.63342	-2.70945	0.00995245	0.156476	-2.71462
MYH8	-0.122214	7.58751	-2.70854	0.00997526	0.156702	-2.71654
SLC28A1	-0.134355	7.36967	-2.70761	0.00999871	0.156852	-2.71852
C10orf71	-0.134609	7.42974	-2.70732	0.0100061	0.156852	-2.71914
OR2A1	-0.142537	7.80559	-2.70655	0.0100255	0.156852	-2.72076
KCNIP4	-0.125989	7.47541	-2.70598	0.0100401	0.156852	-2.72199
DYNLT1	-0.539713	11.7969	-2.70578	0.0100452	0.156852	-2.72242
LOC285513	-0.305752	8.04171	-2.70577	0.0100455	0.156852	-2.72244
OR10A3	-0.125664	7.44328	-2.70568	0.0100477	0.156852	-2.72263
SIX6	-0.144373	7.52339	-2.70548	0.0100527	0.156852	-2.72305
DC-UbP	-0.214128	7.98628	-2.7051	0.0100623	0.156852	-2.72385
B3GNTL1	-0.304881	8.57258	-2.70479	0.0100703	0.156852	-2.72452
BTN2A1	-0.284114	7.99785	-2.70405	0.0100892	0.156852	-2.7261
ARFGEF1	0.796433	9.29993	2.70402	0.0100898	0.156852	-2.72615
CHI3L2	-0.17827	7.70106	-2.70367	0.0100987	0.156852	-2.72689
FLJ10916	-0.299735	7.96767	-2.70352	0.0101027	0.156852	-2.72722
ZNF509	-0.319911	8.47617	-2.70307	0.010114	0.15689	-2.72816
UGT2B17	-0.153501	7.54891	-2.70269	0.0101237	0.15689	-2.72897
BAZ1A	-0.387839	9.53687	-2.70244	0.0101304	0.15689	-2.72952
SCFD1	-0.12398	7.51746	-2.70126	0.0101606	0.157227	-2.73202
OLFM3	-0.123403	7.37379	-2.7005	0.0101801	0.157312	-2.73364
FLJ44076	-0.121784	7.60744	-2.70038	0.010183	0.157312	-2.73388
LOC652236	-0.124012	7.57921	-2.6992	0.0102135	0.157464	-2.7364
MGC23909	0.825169	9.53884	2.69919	0.0102137	0.157464	-2.73641
SLC5A7	-0.125726	7.50271	-2.69887	0.0102219	0.157464	-2.73709
CYorf15A	0.750791	8.29405	2.69837	0.010235	0.157464	-2.73816
NPAL3	-0.45293	9.18753	-2.69832	0.0102361	0.157464	-2.73826
HSMPP8	-0.465045	10.0047	-2.698	0.0102444	0.157464	-2.73893
ARVP6125	-0.129886	7.7277	-2.69771	0.010252	0.157464	-2.73956
RNF121	-0.250838	7.99534	-2.69705	0.010269	0.157526	-2.74095
CHRNA6	-0.15416	7.94733	-2.6969	0.0102729	0.157526	-2.74127
KRTAP12-3	-0.116949	7.5558	-2.69596	0.0102972	0.157769	-2.74326
HOXD10	-0.126915	7.46634	-2.69552	0.0103088	0.157818	-2.74421
MGC26733	-0.150042	7.83637	-2.69485	0.0103261	0.157952	-2.74561
F13A1	0.576583	10.3549	2.6942	0.0103431	0.158083	-2.747
SET7	-0.143551	7.61612	-2.69365	0.0103574	0.158169	-2.74816
ABCC4	0.296079	8.18236	2.69333	0.0103657	0.158169	-2.74884
PSMB5	-0.45075	9.10066	-2.6919	0.0104033	0.158514	-2.75188
OR13C2	-0.138813	7.5972	-2.69182	0.0104054	0.158514	-2.75205
DISC1	-0.396474	8.61932	-2.69121	0.0104214	0.158618	-2.75334
CX36	-0.143142	7.50267	-2.69091	0.0104292	0.158618	-2.75397
ZBTB41	-0.17936	7.7577	-2.69007	0.0104515	0.158775	-2.75576
LARP6	-0.113871	7.60334	-2.68887	0.0104831	0.158775	-2.7583
FKBP7	-0.133289	7.48654	-2.68865	0.0104889	0.158775	-2.75876
STATH	-0.131909	7.75949	-2.68855	0.0104914	0.158775	-2.75897
PNMA5	-0.113649	7.50206	-2.68838	0.010496	0.158775	-2.75933
TMEM127	-0.330366	8.94469	-2.68829	0.0104984	0.158775	-2.75952
WDR22	-0.460678	9.83273	-2.68819	0.0105011	0.158775	-2.75974
LOC728758	-0.426733	8.70026	-2.68766	0.0105151	0.158775	-2.76086
CHST4	-0.133759	7.47277	-2.68761	0.0105162	0.158775	-2.76095
NID2	-0.13806	7.68498	-2.68693	0.0105344	0.158844	-2.76241
FLJ44955	-0.122752	7.62094	-2.6868	0.0105378	0.158844	-2.76268
AKAP10	-0.386797	8.91182	-2.68633	0.0105504	0.158904	-2.76368
SEC24B	-0.131974	7.48941	-2.68468	0.0105941	0.159433	-2.76715
CPXM	-0.117924	7.65675	-2.68354	0.0106246	0.159763	-2.76957
MSRB2	-0.658059	11.7987	-2.68318	0.0106343	0.15978	-2.77033
Klkbl4	-0.128653	7.41004	-2.6825	0.0106526	0.159798	-2.77178
ZC3HAV1	-0.588209	11.3701	-2.6825	0.0106526	0.159798	-2.77178
C9orf156	-0.4162	9.97068	-2.68159	0.010677	0.159963	-2.7737
GFRA1	-0.133736	7.81728	-2.68145	0.0106808	0.159963	-2.774
MAP1LC3C	-0.165585	7.98911	-2.67999	0.0107199	0.16011	-2.77707
MS4A6E	-0.117965	7.49468	-2.6798	0.010725	0.16011	-2.77747
DPEP2	-0.458483	12.3934	-2.67967	0.0107285	0.16011	-2.77774
GNL3L	-0.595385	10.2805	-2.6795	0.0107331	0.16011	-2.77811
FBLN1	-0.116035	7.72362	-2.67949	0.0107336	0.16011	-2.77814
B3GALNT2	-0.150075	7.68979	-2.67885	0.0107506	0.160236	-2.77948
IL23A	-0.303868	7.96726	-2.67782	0.0107786	0.160525	-2.78166
CDH11	-0.159785	7.82428	-2.67746	0.0107883	0.160541	-2.78242
RDH13	-0.335252	8.30894	-2.67703	0.0108	0.160587	-2.78333
TMOD2	-0.129482	7.46831	-2.67648	0.010815	0.160682	-2.78449
C6orf211	0.78276	8.88067	2.67514	0.0108514	0.161094	-2.78732
RPS19BP1	-0.406676	9.39674	-2.67394	0.0108843	0.161352	-2.78985
PALM2-AKAP2	-0.128055	7.4915	-2.67362	0.0108929	0.161352	-2.79052
LOC161931	-0.138476	7.52672	-2.67355	0.0108948	0.161352	-2.79067
EXT2	-0.127539	7.48736	-2.67304	0.010909	0.161434	-2.79176
LRP2	-0.135584	7.53598	-2.67149	0.0109515	0.161934	-2.79502
CHST5	-0.144626	7.47674	-2.67088	0.0109681	0.162052	-2.7963
VAC14	-0.218655	7.99431	-2.66995	0.010994	0.162149	-2.79827
RNPC3	0.742367	9.40297	2.66973	0.0109999	0.162149	-2.79873
RPL3L	-0.191026	7.64003	-2.6697	0.0110008	0.162149	-2.7988
ZMYND10	-0.126029	7.67938	-2.66905	0.0110188	0.162286	-2.80017
RAPGEF6	-0.480172	10.5401	-2.66679	0.0110814	0.162949	-2.80493
C7orf16	-0.118095	7.72115	-2.66675	0.0110825	0.162949	-2.80501
FLJ20309	-0.19373	7.87809	-2.66644	0.011091	0.162949	-2.80566
DNAJC5	-0.345598	9.30327	-2.66614	0.0110994	0.162949	-2.80629
MSH4	-0.137509	7.67713	-2.66543	0.0111191	0.162949	-2.80778
IQCF2	-0.105462	7.52443	-2.66535	0.0111214	0.162949	-2.80795
KIAA0562	-0.262844	8.1143	-2.66522	0.0111251	0.162949	-2.80823
ABHD13	0.548859	8.06256	2.66348	0.0111738	0.163406	-2.81189
ZNF367	-0.131092	7.61409	-2.66328	0.0111793	0.163406	-2.81231
C1orf146	-0.114414	7.48717	-2.66316	0.0111826	0.163406	-2.81255
TNNT3	-0.147819	7.58738	-2.66263	0.0111975	0.163496	-2.81368
FLJ10357	-0.474707	9.07119	-2.66226	0.0112081	0.163522	-2.81447
CADPS	-0.172801	7.92223	-2.66148	0.01123	0.163601	-2.8161
TKT	-0.45286	13.5043	-2.66144	0.0112311	0.163601	-2.81619
MRPL47	0.652466	8.40904	2.66028	0.0112637	0.163873	-2.81862
GJB2	-0.125275	7.57791	-2.66015	0.0112673	0.163873	-2.81889
LRRC3	-0.132373	7.68834	-2.65925	0.0112929	0.164063	-2.82079
ZNF718	-0.149828	7.92266	-2.65907	0.011298	0.164063	-2.82117
PRKY	0.541986	8.0393	2.65872	0.0113078	0.164078	-2.8219
CASC4	-0.225944	7.96019	-2.65729	0.0113483	0.164537	-2.8249
B4GALT2	-0.123766	7.65335	-2.6569	0.0113594	0.16457	-2.82572
SGK2	-0.146042	7.47742	-2.65642	0.0113732	0.164641	-2.82674
STX10	-0.417371	11.7817	-2.65478	0.0114198	0.165039	-2.83017
LOC389517	-0.113071	7.46874	-2.65465	0.0114235	0.165039	-2.83044
NTN1	-0.129304	7.62595	-2.65419	0.0114367	0.165039	-2.83141
MAP4K2	-0.38871	12.0231	-2.65402	0.0114416	0.165039	-2.83177
PRKCBP1	-0.349211	8.51123	-2.65377	0.0114488	0.165039	-2.8323
FLJ23878	-0.101863	7.48858	-2.6536	0.0114538	0.165039	-2.83266
LOC401431	-0.204604	7.857	-2.65295	0.0114722	0.165088	-2.83401
NOG	-0.139716	7.68226	-2.65277	0.0114774	0.165088	-2.83439
MAOB	-0.133071	7.76785	-2.65255	0.0114838	0.165088	-2.83486
C21orf88	-0.139879	7.68674	-2.65168	0.0115089	0.16513	-2.83669
FLJ42461	-0.117368	7.36619	-2.65085	0.0115327	0.16513	-2.83842
STOML3	-0.145058	7.59004	-2.65058	0.0115406	0.16513	-2.839
CLPB	-0.108572	7.63048	-2.65053	0.0115418	0.16513	-2.83909
CASC1	-0.153818	7.76437	-2.65053	0.011542	0.16513	-2.8391
CD46	-0.530285	12.2876	-2.65048	0.0115433	0.16513	-2.83919
CDY2A	-0.121843	7.44619	-2.65027	0.0115494	0.16513	-2.83964
LAMB4	-0.129065	7.66759	-2.64978	0.0115636	0.16513	-2.84067
C14orf105	-0.127222	7.60021	-2.64968	0.0115665	0.16513	-2.84087
GSTM5	-0.109089	7.66403	-2.64832	0.011606	0.165457	-2.84374
PTCD2	-0.334183	8.15093	-2.64828	0.0116072	0.165457	-2.84382
GALNAC4S-6ST	-0.497898	12.8522	-2.64794	0.011617	0.165472	-2.84453
AKAP13	-0.417167	9.76068	-2.64729	0.0116358	0.16549	-2.84589
FUT6	-0.125842	7.69111	-2.64725	0.0116371	0.16549	-2.84598
ELA2B	-0.154925	7.89892	-2.64692	0.0116465	0.16549	-2.84666
ANXA4	0.570127	8.37551	2.64667	0.0116538	0.16549	-2.84719
BLOC1S3	-0.122215	7.59177	-2.64568	0.0116827	0.165773	-2.84926
CLCN5	-0.118076	7.59452	-2.64506	0.0117009	0.165791	-2.85057
KCNG4	-0.140742	7.42913	-2.64475	0.0117098	0.165791	-2.8512
BBS12	-0.167565	7.93035	-2.64472	0.0117106	0.165791	-2.85126
DTNBP1	-0.251667	8.39638	-2.64363	0.0117428	0.16612	-2.85356
LCE2C	-0.141085	7.45382	-2.64303	0.0117604	0.166143	-2.85482
KRTCAP2	-0.516835	11.9879	-2.64296	0.0117622	0.166143	-2.85495
PLCD1	-0.282119	8.33582	-2.64244	0.0117777	0.166231	-2.85605
SLC15A2	-0.220051	7.93722	-2.64194	0.0117924	0.166231	-2.8571
IFNAR1	-0.398012	10.8297	-2.6416	0.0118024	0.166231	-2.85781
ZNF692	-0.239836	9.05622	-2.64154	0.0118042	0.166231	-2.85793
C10orf92	-0.121981	7.85615	-2.6412	0.0118141	0.166246	-2.85864
C13orf18	-0.473178	9.61751	-2.64079	0.0118262	0.166289	-2.85949
GPR18	-0.541763	9.36458	-2.63992	0.011852	0.166527	-2.86132
RABGEF1	0.717742	8.72733	2.63878	0.0118858	0.166839	-2.86371
RAD21	1.0471	11.063	2.63849	0.0118945	0.166839	-2.86432
STK17B	0.609613	8.05111	2.63826	0.0119011	0.166839	-2.86479
LONRF3	-0.133333	7.52781	-2.63721	0.0119324	0.166949	-2.86699
TTTY19	-0.117406	7.72357	-2.6371	0.0119356	0.166949	-2.86721
PCDHB16	-0.122372	7.49505	-2.63709	0.0119358	0.166949	-2.86723
RBBP5	-0.396658	9.30397	-2.63614	0.0119642	0.166997	-2.86922
MEOX2	-0.1104	7.4967	-2.63585	0.0119729	0.166997	-2.86983
RNF113B	-0.132109	7.7996	-2.63557	0.0119814	0.166997	-2.87042
MAPK13	-0.38132	8.55795	-2.63497	0.0119991	0.166997	-2.87166
SV2B	-0.163307	7.80431	-2.63492	0.0120006	0.166997	-2.87177
RHOQ	-0.45771	12.6178	-2.63473	0.0120065	0.166997	-2.87218
NVL	-0.313072	8.69755	-2.63462	0.0120098	0.166997	-2.87241
KSR1	-0.150911	7.84101	-2.63456	0.0120115	0.166997	-2.87253
ANKRD30A	-0.121281	7.60181	-2.63401	0.0120281	0.166997	-2.87368
RANBP9	0.490161	8.44288	2.63389	0.0120316	0.166997	-2.87393
SULF2	0.697445	9.6006	2.63368	0.0120378	0.166997	-2.87436
GCKR	-0.138429	7.74088	-2.63306	0.0120565	0.167099	-2.87566
GPX2	-0.127715	7.7563	-2.63284	0.0120631	0.167099	-2.87612
AKAP11	-0.138002	7.41957	-2.63182	0.0120938	0.16726	-2.87825
PIAS1	-0.399716	11.1084	-2.63149	0.0121038	0.16726	-2.87894
STAB2	-0.115428	7.46805	-2.63089	0.0121218	0.16726	-2.88018
PCDH15	-0.115604	7.53367	-2.6307	0.0121276	0.16726	-2.88059
MGC27121	-0.116293	7.66267	-2.62993	0.0121509	0.16726	-2.88219
VDAC2	0.509684	7.94425	2.62882	0.0121844	0.16726	-2.8845
OR2L2	-0.100855	7.40428	-2.62803	0.0122085	0.16726	-2.88616
ZNF510	-0.195481	7.78741	-2.6276	0.0122214	0.16726	-2.88704
LGP2	-0.473237	8.59375	-2.62729	0.012231	0.16726	-2.8877
PRM3	-0.144297	7.77895	-2.62695	0.0122413	0.16726	-2.88841
LIF	-0.116138	7.61651	-2.6269	0.0122428	0.16726	-2.88851
GPR15	-0.159211	7.76773	-2.62639	0.0122583	0.16726	-2.88957
KIAA0329	-0.237308	8.11277	-2.62625	0.0122628	0.16726	-2.88987
LOC340527	-0.194226	7.73397	-2.6261	0.0122673	0.16726	-2.89018
GLOXD1	-0.11122	7.58179	-2.626	0.0122703	0.16726	-2.89039
CA12	-0.126256	7.57749	-2.62596	0.0122716	0.16726	-2.89048
SNX27	-0.473141	11.7606	-2.62574	0.0122783	0.16726	-2.89093
NT5C3	-0.528297	12.3139	-2.6257	0.0122794	0.16726	-2.89101
MRPS36	-0.264848	8.41422	-2.62569	0.0122798	0.16726	-2.89104
LOC653620	-0.129882	7.80041	-2.62519	0.012295	0.16726	-2.89207
DDIT3	-0.411	9.50873	-2.62513	0.0122969	0.16726	-2.8922
C6orf128	0.374095	8.55185	2.62469	0.0123104	0.16726	-2.89312
CARD10	-0.12414	7.56307	-2.62437	0.01232	0.16726	-2.89378
ACSL6	-0.141172	7.62077	-2.62427	0.0123231	0.16726	-2.89398
TPRKB	0.542818	8.10094	2.62422	0.0123246	0.16726	-2.89409
HSPB8	-0.110627	7.4448	-2.62411	0.0123282	0.16726	-2.89433
TRAF2	-0.250978	8.0736	-2.62371	0.0123404	0.16726	-2.89516
ACTR3	0.953966	11.9059	2.62355	0.0123452	0.16726	-2.89549
TMEM157	0.823701	8.59853	2.62291	0.0123651	0.16726	-2.89683
GAP43	-0.117095	7.66601	-2.62289	0.0123657	0.16726	-2.89687
FLJ45803	-0.118731	7.5719	-2.6228	0.0123684	0.16726	-2.89706
ZNF177	-0.250782	7.81672	-2.62269	0.0123717	0.16726	-2.89728
DSPG3	-0.117917	7.44434	-2.62259	0.0123749	0.16726	-2.89749
ACP6	-0.195727	8.12459	-2.62216	0.0123881	0.16726	-2.89839
THRAP6	-0.505888	10.4325	-2.62213	0.0123889	0.16726	-2.89845
UNC5B	-0.134342	7.73556	-2.62144	0.0124102	0.167418	-2.89988
BRAF	-0.185908	7.99107	-2.62099	0.0124241	0.167418	-2.90082
WDSOF1	0.535336	8.10269	2.62088	0.0124276	0.167418	-2.90106
IL16	-0.433445	9.86527	-2.61964	0.012466	0.167808	-2.90364
AP2B1	-0.237844	8.63833	-2.61936	0.0124746	0.167808	-2.90422
LOC647649	-0.111297	7.4687	-2.61853	0.0125003	0.168015	-2.90594
C1R	-0.139723	7.62313	-2.61828	0.012508	0.168015	-2.90646
ZNHIT1	-0.42469	10.9976	-2.61749	0.0125326	0.168055	-2.9081
MAEA	-0.324442	8.34285	-2.61709	0.0125451	0.168055	-2.90893
CNOT10	-0.324156	9.1411	-2.61685	0.0125525	0.168055	-2.90943
VMD2	-0.521768	10.1919	-2.61685	0.0125525	0.168055	-2.90943
GAB1	-0.125162	7.36736	-2.61652	0.0125628	0.168055	-2.91012
CXCL11	-0.117605	7.50451	-2.61612	0.0125754	0.168055	-2.91096
C3orf19	-0.426008	10.7382	-2.61603	0.0125781	0.168055	-2.91113
PRTG	-0.11987	7.53209	-2.61562	0.012591	0.168055	-2.91199
C9orf9	-0.142271	7.66121	-2.61538	0.0125986	0.168055	-2.9125
C4orf16	0.444946	8.04943	2.61477	0.0126176	0.168055	-2.91376
C6orf146	-0.124923	7.54472	-2.61473	0.0126187	0.168055	-2.91383
ZNF223	1.07321	11.781	2.61398	0.0126424	0.168055	-2.9154
ABCG1	0.53543	8.72274	2.6138	0.012648	0.168055	-2.91577
OR56A4	-0.113637	7.5396	-2.61366	0.0126526	0.168055	-2.91608
CMTM3	-0.204477	8.21547	-2.61363	0.0126535	0.168055	-2.91614
DIP2C	-0.211843	7.83118	-2.61352	0.0126568	0.168055	-2.91635
PARK2	-0.113245	7.56781	-2.61312	0.0126695	0.168055	-2.91719
OR2T33	-0.129941	7.78954	-2.61285	0.0126778	0.168055	-2.91774
C20orf144	-0.137687	7.48428	-2.61262	0.012685	0.168055	-2.91822
S100A4	-0.336399	15.4084	-2.6124	0.0126922	0.168055	-2.91869
PAK3	-0.155365	7.72369	-2.61214	0.0127004	0.168055	-2.91923
ARHGAP8	-0.12325	7.55471	-2.6113	0.0127269	0.168286	-2.92098
MTNR1A	-0.135509	7.52848	-2.61065	0.0127472	0.168314	-2.92231
ADSSL1	-0.140802	7.89153	-2.61043	0.0127543	0.168314	-2.92278
AMAC1L2	-0.15334	7.72866	-2.61037	0.0127562	0.168314	-2.9229
PTPRC	-0.84329	10.5754	-2.60947	0.0127848	0.168472	-2.92477
LILRB3	-0.438247	13.9634	-2.60929	0.0127903	0.168472	-2.92514
FES	-0.500043	10.5191	-2.60905	0.012798	0.168472	-2.92564
FARP2	-0.149561	8.15607	-2.60879	0.0128064	0.168472	-2.92619
NEU3	-0.142239	7.95243	-2.60857	0.0128133	0.168472	-2.92664
POTE2	0.318887	7.79137	2.60808	0.0128287	0.168556	-2.92765
C10orf58	0.755606	14.1313	2.60696	0.0128644	0.168905	-2.92997
TRSPAP1	-0.212116	8.14334	-2.606	0.0128952	0.16919	-2.93197
DCBLD2	-0.152526	7.67133	-2.60536	0.0129156	0.169339	-2.93329
RLN3	-0.139168	7.58107	-2.60477	0.0129344	0.169355	-2.93451
SGPP2	-0.125997	7.49549	-2.60474	0.0129356	0.169355	-2.93459
SMPDL3A	0.4864	8.08285	2.60447	0.0129441	0.169355	-2.93514
RBM5	-0.483411	12.2977	-2.60339	0.0129788	0.169682	-2.93737
FGL1	-0.139637	7.58059	-2.60274	0.0129998	0.169682	-2.93873
TBX1	-0.149396	7.51396	-2.60229	0.0130141	0.169682	-2.93965
RPS15	-0.391049	14.3067	-2.60221	0.0130167	0.169682	-2.93982
BCDO2	-0.122818	7.49128	-2.60167	0.0130341	0.169682	-2.94093
HERC2	-0.343186	8.62456	-2.60163	0.0130357	0.169682	-2.94103
CKM	-0.144971	7.49218	-2.60153	0.0130387	0.169682	-2.94122
POU5F1	-0.111477	7.41868	-2.6012	0.0130493	0.169682	-2.94191
ZNF442	-0.166089	8.03002	-2.60115	0.0130511	0.169682	-2.94202
WHDC1	-0.295232	8.61139	-2.60018	0.0130824	0.169798	-2.94402
RPSA	0.630688	8.38158	2.60013	0.0130841	0.169798	-2.94413
SPRR2E	-0.130526	7.46723	-2.60003	0.0130873	0.169798	-2.94434
ZNF650	-0.35742	9.21229	-2.59922	0.0131134	0.169911	-2.946
RNF25	-0.230684	7.96116	-2.5992	0.0131143	0.169911	-2.94606
USP6NL	-0.132905	7.4944	-2.59842	0.0131397	0.170122	-2.94768
TRIB2	-0.534263	9.45666	-2.59764	0.013165	0.170331	-2.94929
2023-03-03	-0.319713	8.5417	-2.59686	0.0131903	0.17054	-2.95089
FBXO24	-0.120049	7.56968	-2.59615	0.0132134	0.17072	-2.95236
C6orf152	-0.122007	7.78882	-2.59553	0.013234	0.170867	-2.95366
PTPLAD2	1.14441	12.3082	2.59283	0.0133224	0.171891	-2.95923
SPTBN1	-0.31183	8.32435	-2.59201	0.0133496	0.171959	-2.96093
C3orf56	-0.123545	7.54185	-2.59157	0.0133642	0.171959	-2.96184
CCBL1	-0.298539	8.63992	-2.59147	0.0133673	0.171959	-2.96204
NTS	-0.112036	7.50092	-2.59146	0.0133676	0.171959	-2.96206
MYOG	-0.169581	7.78972	-2.59055	0.0133978	0.171959	-2.96395
WFDC8	-0.170934	7.8139	-2.59053	0.0133984	0.171959	-2.96398
CASP1	0.472853	7.8293	2.59048	0.0134001	0.171959	-2.96409
FLJ25976	-0.122794	7.4146	-2.59018	0.01341	0.171959	-2.96471
CEACAM7	-0.131366	7.52372	-2.59016	0.0134108	0.171959	-2.96476
RGS10	-0.424052	10.3892	-2.58905	0.0134473	0.172133	-2.96703
FLJ20581	-0.146196	7.97513	-2.58874	0.0134576	0.172133	-2.96767
C1orf50	-0.378016	10.1571	-2.58872	0.0134583	0.172133	-2.96771
C12orf30	0.395585	8.02476	2.58797	0.0134834	0.172133	-2.96927
SYK	-0.400842	12.2156	-2.58786	0.013487	0.172133	-2.96949
TRIM17	-0.129768	7.85787	-2.58784	0.0134877	0.172133	-2.96954
ULBP1	-0.139671	7.65904	-2.5878	0.013489	0.172133	-2.96962
ZNF641	-0.547302	10.1137	-2.58664	0.0135276	0.172507	-2.972
SELE	-0.148309	7.77604	-2.58586	0.013554	0.172725	-2.97363
ITIH5	-0.110292	7.56072	-2.58484	0.0135879	0.172844	-2.97572
LOC644997	-0.117275	7.66476	-2.58477	0.0135903	0.172844	-2.97587
SERTAD4	-0.118347	7.74225	-2.58475	0.0135912	0.172844	-2.97592
LYSMD3	0.636321	8.34699	2.58446	0.0136007	0.172848	-2.97651
NR2F2	-0.122696	7.50073	-2.58381	0.0136225	0.173007	-2.97784
ITGA11	-0.126277	7.57935	-2.58302	0.013649	0.173127	-2.97947
WRNIP1	-0.319698	8.36718	-2.58204	0.0136823	0.173127	-2.9815
PIP	-0.157897	7.72525	-2.58173	0.0136925	0.173127	-2.98213
C9orf68	-0.120981	7.50973	-2.58127	0.0137082	0.173127	-2.98308
COMMD5	-0.161351	7.95504	-2.58124	0.0137092	0.173127	-2.98315
IER3	-0.424399	9.36423	-2.58105	0.0137157	0.173127	-2.98354
SMEK3P	-0.116417	7.50782	-2.58089	0.013721	0.173127	-2.98387
ROM1	-0.176237	8.18476	-2.58089	0.0137211	0.173127	-2.98387
C8orf15	-0.113033	7.68887	-2.5805	0.0137343	0.173127	-2.98467
YY1	1.00301	10.9256	2.58013	0.0137469	0.173127	-2.98544
APBA3	-0.390947	9.55272	-2.58011	0.0137475	0.173127	-2.98548
ZNF595	-0.138952	7.40741	-2.58005	0.0137494	0.173127	-2.98559
CCNL2	-0.249201	7.87631	-2.57995	0.0137528	0.173127	-2.9858
GABPA	-0.121001	7.47162	-2.57869	0.0137957	0.173443	-2.9884
CSS3	-0.141284	7.68374	-2.57866	0.0137965	0.173443	-2.98845
YIPF6	-0.347063	10.6356	-2.57818	0.013813	0.173487	-2.98945
PCTK1	-0.142022	7.60482	-2.57792	0.013822	0.173487	-2.98999
DNAH11	-0.121545	7.40169	-2.57774	0.0138279	0.173487	-2.99035
CYP3A5	-0.11389	7.59564	-2.57745	0.013838	0.173496	-2.99095
KIAA1772	-0.107534	7.47884	-2.57649	0.0138708	0.173791	-2.99293
GSDM1	0.374833	8.56925	2.57561	0.0139008	0.173854	-2.99474
KIAA0323	-0.39579	9.69543	-2.57554	0.0139032	0.173854	-2.99488
THNSL1	-0.287064	8.11008	-2.57537	0.0139089	0.173854	-2.99523
PSD2	-0.10846	7.6425	-2.57502	0.0139209	0.173854	-2.99595
STK38	-0.427767	12.0797	-2.57498	0.0139225	0.173854	-2.99604
LOC143543	0.72204	8.84285	2.57439	0.0139425	0.173987	-2.99724
CMTM2	-0.500777	13.3743	-2.57365	0.0139682	0.174191	-2.99878
RPS9	-0.45478	14.3594	-2.57335	0.0139782	0.1742	-2.99938
HIST1H4H	-0.546583	9.63477	-2.57301	0.0139899	0.174209	-3.00007
OR5H14	-0.132758	7.47934	-2.57279	0.0139977	0.174209	-3.00054
PRSS7	-0.202408	8.29681	-2.57202	0.0140241	0.174319	-3.00211
P2RX5	-0.33052	7.94681	-2.57199	0.0140253	0.174319	-3.00218
OTOS	-0.108565	7.41573	-2.57117	0.0140535	0.174554	-3.00386
GPR153	-0.124882	7.85265	-2.57013	0.0140897	0.174887	-3.00601
NEU1	-0.375187	9.28479	-2.56975	0.0141027	0.174932	-3.00678
SLC5A4	-0.124479	7.46902	-2.56911	0.0141248	0.175033	-3.00809
FLJ23518	0.536228	8.0069	2.56879	0.014136	0.175033	-3.00875
ARHGAP15	-0.468376	12.3882	-2.56871	0.014139	0.175033	-3.00892
15E1.2	-0.272667	7.99938	-2.56826	0.0141546	0.175043	-3.00984
BHLHB3	-0.113792	7.69547	-2.56786	0.0141685	0.175043	-3.01066
ERGIC1	0.732909	8.90243	2.56752	0.0141804	0.175043	-3.01136
CRSP9	0.597852	8.24142	2.56744	0.0141832	0.175043	-3.01153
ZNF326	-0.170337	7.6759	-2.56733	0.0141868	0.175043	-3.01174
ADAM3A	-0.111846	7.49063	-2.56699	0.0141989	0.175076	-3.01245
SLC35D1	-0.120848	7.60872	-2.56628	0.0142237	0.175248	-3.01391
IRF4	0.396943	8.20209	2.56605	0.0142317	0.175248	-3.01438
FAM107B	-0.518125	11.8453	-2.56554	0.0142497	0.175354	-3.01543
SIGLEC9	-0.253071	8.45173	-2.56475	0.0142771	0.175406	-3.01704
LBR	-0.498163	9.96611	-2.56377	0.0143117	0.175406	-3.01906
SOX7	0.210451	7.90332	2.56371	0.0143138	0.175406	-3.01918
AMID	-0.132361	7.77578	-2.56363	0.0143166	0.175406	-3.01934
Septin 6	-0.537083	9.97939	-2.56336	0.0143259	0.175406	-3.01988
PRAMEF8	-0.109727	7.71364	-2.56289	0.0143426	0.175406	-3.02086
TMEM30B	-0.200365	7.86314	-2.56262	0.0143522	0.175406	-3.02142
RPE	-0.124276	7.6349	-2.562	0.0143739	0.175406	-3.02267
KLK13	-0.13259	7.37313	-2.562	0.0143741	0.175406	-3.02269
TMEM116	-0.405167	8.94208	-2.56197	0.0143749	0.175406	-3.02273
SNAPC1	0.988127	10.253	2.56192	0.0143768	0.175406	-3.02284
C6orf65	-0.130725	7.50713	-2.56183	0.0143799	0.175406	-3.02303
CCDC85A	-0.128506	7.39182	-2.56176	0.0143824	0.175406	-3.02317
SCGB3A2	-0.159349	7.71516	-2.56149	0.0143922	0.175406	-3.02374
C21orf55	-0.127274	7.53375	-2.5612	0.0144023	0.175406	-3.02432
C14orf102	-0.408673	10.4211	-2.56091	0.0144126	0.175406	-3.02492
NBPF20	-0.492954	13.2674	-2.56087	0.014414	0.175406	-3.025
G3BP1	0.857016	9.51652	2.56061	0.0144234	0.175406	-3.02554
ITIH4	-0.249485	8.05305	-2.56009	0.0144417	0.175462	-3.0266
SLC5A3	-0.206794	7.90622	-2.55955	0.0144608	0.175462	-3.0277
POU1F1	-0.109198	7.39292	-2.55947	0.0144635	0.175462	-3.02786
SNX21	-0.116401	7.43024	-2.55926	0.0144712	0.175462	-3.0283
ZBTB11	0.805483	8.84564	2.55915	0.0144751	0.175462	-3.02853
MRC1	-0.105474	7.46006	-2.55886	0.0144852	0.175466	-3.02911
SHANK3	-0.130058	7.76285	-2.55861	0.0144943	0.175466	-3.02963
SP100	-0.376299	8.60625	-2.55818	0.0145094	0.175481	-3.0305
2023-03-02	0.336663	8.874	2.55796	0.0145173	0.175481	-3.03096
MGC42174	-0.196881	8.49391	-2.55754	0.0145323	0.175481	-3.03182
LOC339229	-0.271757	8.3617	-2.55752	0.0145331	0.175481	-3.03187
CRSP2	-0.117212	7.64395	-2.55676	0.0145603	0.175695	-3.03342
FAU	-0.572044	14.1467	-2.55616	0.0145818	0.17584	-3.03465
BRDT	-0.12302	7.45337	-2.555	0.014623	0.176224	-3.03701
MBD3L2	-0.116184	7.62938	-2.55422	0.014651	0.176224	-3.03861
NPTX2	-0.147625	7.54274	-2.55387	0.0146636	0.176224	-3.03932
MRP63	0.961333	9.96701	2.55382	0.0146656	0.176224	-3.03944
CDCA1	-0.142161	7.62565	-2.5532	0.0146877	0.176224	-3.04069
IGSF4	-0.220635	7.71619	-2.55301	0.0146947	0.176224	-3.04109
SP140	-0.410242	8.69096	-2.55294	0.0146971	0.176224	-3.04123
NXT2	0.687418	8.79263	2.55276	0.0147037	0.176224	-3.0416
MATR3	-0.190779	7.64792	-2.55251	0.0147127	0.176224	-3.04211
CASK	-0.32162	8.16037	-2.55243	0.0147157	0.176224	-3.04228
ARHGAP30	-0.385998	12.0863	-2.55237	0.0147176	0.176224	-3.04239
LRMP	-0.418328	11.4782	-2.55151	0.0147487	0.176482	-3.04415
ADAM21	-0.135057	7.79305	-2.5508	0.0147746	0.1766	-3.04561
CDH22	-0.139025	7.66203	-2.55069	0.0147784	0.1766	-3.04583
LYZ	0.844699	11.6658	2.55045	0.014787	0.1766	-3.04631
TRAPPC5	-0.356096	11.2901	-2.54942	0.0148246	0.176831	-3.04843
BAGE2	-0.147894	7.6526	-2.54908	0.0148369	0.176831	-3.04912
C3orf52	-0.121905	7.60022	-2.5488	0.0148471	0.176831	-3.04969
DUSP4	-0.121795	7.5296	-2.54832	0.0148646	0.176831	-3.05067
CASC3	-0.380854	10.775	-2.54817	0.0148702	0.176831	-3.05099
KIAA1622	-0.124553	7.57012	-2.54786	0.0148812	0.176831	-3.05161
SPRY3	-0.145284	7.72441	-2.54771	0.0148866	0.176831	-3.05191
GPR89A	-0.296924	8.17861	-2.5476	0.0148907	0.176831	-3.05214
CDC2L2	-0.222924	8.17114	-2.54757	0.0148917	0.176831	-3.0522
ETV3	-0.405007	8.83361	-2.54656	0.0149287	0.177158	-3.05426
ZBTB2	0.441286	8.17409	2.54621	0.0149416	0.177198	-3.05498
HABP2	-0.133469	7.54381	-2.54439	0.0150081	0.177749	-3.05869
IL1RL1	-0.109254	7.4784	-2.54429	0.0150119	0.177749	-3.05889
CHCHD6	-0.2051	7.77001	-2.54416	0.0150167	0.177749	-3.05916
LIMS2	-0.15894	7.80568	-2.54387	0.0150273	0.177761	-3.05975
PARK7	-0.652522	10.4652	-2.54233	0.0150841	0.178263	-3.06289
RSN	-0.267607	7.95919	-2.5422	0.0150888	0.178263	-3.06316
RNF41	-0.142396	7.64656	-2.54192	0.0150993	0.178273	-3.06373
DTWD2	1.07034	13.0401	2.5415	0.0151149	0.178295	-3.06459
EIF4G3	-0.374184	9.78835	-2.54084	0.0151391	0.178295	-3.06593
ASNS	-0.488834	9.58966	-2.54081	0.0151403	0.178295	-3.06599
MIDN	-0.422259	11.0043	-2.54049	0.0151523	0.178295	-3.06665
LHFPL3	0.236226	8.08107	2.54038	0.0151561	0.178295	-3.06686
OSMR	-0.114577	7.51738	-2.54022	0.0151622	0.178295	-3.0672
CHP	0.541144	10.0291	2.54006	0.0151681	0.178295	-3.06752
GPHN	-0.183727	7.79468	-2.53951	0.0151886	0.178313	-3.06865
TRIB1	-0.479792	11.033	-2.53946	0.0151902	0.178313	-3.06874
CDRT1	-0.131127	7.60091	-2.53924	0.0151984	0.178313	-3.06918
LOC201175	-0.438409	9.32712	-2.53877	0.0152158	0.178356	-3.07014
NGFB	-0.136371	8.10002	-2.53863	0.0152212	0.178356	-3.07043
FLJ39599	0.442134	8.10093	2.5382	0.0152372	0.178387	-3.07131
TBC1D3B	-0.300958	8.67454	-2.53804	0.015243	0.178387	-3.07163
DYNLT3	0.409209	7.80541	2.53735	0.0152689	0.178578	-3.07304
POT1	0.394698	7.873	2.5365	0.0153007	0.178838	-3.07478
CDC6	-0.112973	7.56811	-2.53595	0.0153212	0.178848	-3.07589
MAGI3	-0.143028	7.42154	-2.53572	0.0153299	0.178848	-3.07636
PHACTR1	-0.367193	8.21337	-2.53555	0.0153363	0.178848	-3.07671
LRCH3	-0.387897	8.95169	-2.53545	0.01534	0.178848	-3.07691
CACNA1G	-0.0863178	7.5568	-2.53475	0.0153663	0.178966	-3.07834
LOC650645	-0.135373	7.66575	-2.53443	0.0153782	0.178966	-3.07899
ZNF671	-0.424183	9.53208	-2.53441	0.0153789	0.178966	-3.07902
OR2G2	-0.109883	7.4751	-2.53383	0.0154009	0.17898	-3.08021
RANGNRF	0.630098	8.35599	2.53372	0.0154048	0.17898	-3.08042
PSMB4	-0.45178	11.8907	-2.53358	0.0154103	0.17898	-3.08072
OR13G1	-0.129247	7.55831	-2.53318	0.0154253	0.17898	-3.08153
TLR2	-0.512355	9.1958	-2.53267	0.0154446	0.17898	-3.08257
NY-SAR-48	-0.257694	8.10551	-2.53231	0.0154578	0.17898	-3.08329
PTHLH	-0.124049	7.62918	-2.53224	0.0154607	0.17898	-3.08344
WDRPUH	-0.126183	7.61317	-2.53172	0.0154804	0.17898	-3.0845
LIN7A	-0.34669	8.88003	-2.53153	0.0154875	0.17898	-3.08488
NFKBIZ	-0.570839	12.3221	-2.53145	0.0154906	0.17898	-3.08505
PRKAB1	-0.362551	9.15083	-2.53138	0.0154932	0.17898	-3.08519
MATN4	-0.120263	7.40478	-2.5311	0.0155037	0.17898	-3.08575
ST8SIA3	-0.128972	7.74617	-2.53107	0.015505	0.17898	-3.08582
IL1RAPL2	-0.11436	7.54356	-2.53059	0.0155231	0.179046	-3.08679
RNF125	-0.375092	8.53442	-2.53029	0.0155344	0.179046	-3.0874
SCAND1	-0.437193	9.95893	-2.52994	0.0155478	0.179046	-3.08812
CRSP6	-0.19024	7.96403	-2.52956	0.015562	0.179046	-3.08888
ORC4L	-0.225428	8.04776	-2.5293	0.0155719	0.179046	-3.08941
C19orf55	-0.126487	7.64602	-2.52928	0.0155729	0.179046	-3.08946
UBE2W	0.475194	8.2081	2.52871	0.0155944	0.179046	-3.09061
LOC653685	-0.117041	7.47471	-2.52841	0.0156057	0.179046	-3.09121
ATG16L2	-0.425628	10.0345	-2.52816	0.0156153	0.179046	-3.09172
SLC34A3	-0.128152	7.6402	-2.52794	0.0156237	0.179046	-3.09217
TRAF3IP3	-0.520778	11.1103	-2.52789	0.0156258	0.179046	-3.09229
CDC42BPG	-0.125207	7.44494	-2.52787	0.0156264	0.179046	-3.09232
PLAG1	-0.132141	7.58312	-2.52763	0.0156356	0.179046	-3.09281
MAML2	-0.168941	7.75928	-2.52725	0.0156499	0.179072	-3.09357
SCN10A	-0.11685	7.57202	-2.52685	0.0156654	0.179072	-3.09439
LOXL4	-0.122549	7.68949	-2.52681	0.0156668	0.179072	-3.09447
KIAA0853	-0.137056	7.73992	-2.52602	0.0156971	0.179299	-3.09607
HAS2	-0.11989	7.56227	-2.52542	0.01572	0.179299	-3.09729
MPPE1	-0.531804	11.0349	-2.52538	0.0157216	0.179299	-3.09737
LOC441244	0.379206	7.92949	2.52529	0.0157251	0.179299	-3.09756
LOC285193	-0.446282	9.39085	-2.52494	0.0157384	0.179334	-3.09826
SLC25A45	-0.166223	7.767	-2.52471	0.0157474	0.179334	-3.09874
MEP1A	-0.142243	7.92868	-2.52433	0.0157618	0.179368	-3.0995
C8orf58	-0.176654	7.96694	-2.52399	0.0157748	0.179368	-3.10018
ERCC3	-0.387479	8.9641	-2.52354	0.0157923	0.179368	-3.10111
GGTLA4	-0.112984	7.76867	-2.52324	0.0158038	0.179368	-3.10172
PPCDC	-0.2374	8.14726	-2.52244	0.0158348	0.179368	-3.10335
MBNL1	-0.119733	7.59899	-2.52241	0.0158358	0.179368	-3.1034
ELSPBP1	-0.12781	7.52947	-2.52167	0.0158643	0.179368	-3.10489
RAB31	-0.387025	13.2176	-2.52157	0.0158681	0.179368	-3.10509
GPR128	-0.123627	7.63249	-2.52144	0.0158732	0.179368	-3.10536
CCDC74A	-0.125649	7.59128	-2.52126	0.0158803	0.179368	-3.10574
CYP51A1	0.561246	8.52655	2.5211	0.0158863	0.179368	-3.10605
KIAA1729	-0.406171	9.023	-2.52088	0.0158948	0.179368	-3.10649
IFITM1	-0.462967	14.3253	-2.52058	0.0159066	0.179368	-3.10711
LRRIQ2	-0.12733	7.47628	-2.52057	0.015907	0.179368	-3.10713
CALML4	0.414186	8.02805	2.52056	0.0159073	0.179368	-3.10715
KIAA1279	0.411183	8.00327	2.5205	0.0159098	0.179368	-3.10728
C20orf121	-0.359372	8.95131	-2.52038	0.0159141	0.179368	-3.1075
OR7C1	-0.116332	7.47843	-2.51985	0.0159347	0.179491	-3.10858
SLC39A4	-0.12254	7.44501	-2.51907	0.0159651	0.179622	-3.11017
MYL2	-0.12406	7.54192	-2.51906	0.0159655	0.179622	-3.11019
SLC17A4	-0.117268	7.5038	-2.51805	0.0160048	0.179668	-3.11224
TAT	-0.108411	7.56029	-2.51785	0.0160127	0.179668	-3.11264
TMSB4Y	0.203941	7.63361	2.51779	0.016015	0.179668	-3.11276
CER1	-0.117728	7.46625	-2.51772	0.0160178	0.179668	-3.11291
GAMT	-0.316886	8.42406	-2.51771	0.0160179	0.179668	-3.11291
TRG20	-0.475527	9.96521	-2.5165	0.0160651	0.179748	-3.11536
SELV	-0.103645	7.53111	-2.51645	0.0160673	0.179748	-3.11548
ANGPTL1	-0.125043	7.51265	-2.51625	0.0160749	0.179748	-3.11587
VANGL1	-0.133563	7.56285	-2.51586	0.0160904	0.179748	-3.11667
MGC17330	-0.629911	11.5252	-2.51507	0.0161212	0.179748	-3.11826
HSPC065	-0.124108	7.74967	-2.51501	0.0161235	0.179748	-3.11838
CNTN6	-0.132753	7.74725	-2.51471	0.0161355	0.179748	-3.119
NXF3	-0.149406	7.66747	-2.51468	0.0161367	0.179748	-3.11906
PODXL2	-0.15303	7.70571	-2.51467	0.0161368	0.179748	-3.11907
APLN	-0.132678	7.6486	-2.51434	0.0161499	0.179748	-3.11974
ACOXL	-0.136159	7.52916	-2.51434	0.0161499	0.179748	-3.11974
OR4C12	-0.118903	7.59658	-2.51412	0.0161584	0.179748	-3.12018
ATP11C	-0.203908	7.77351	-2.51409	0.0161597	0.179748	-3.12025
CHIA	-0.1213	7.42953	-2.51408	0.01616	0.179748	-3.12027
RPH3AL	-0.225696	7.89003	-2.51315	0.0161969	0.18005	-3.12216
KCNK12	-0.255953	7.96971	-2.5128	0.0162105	0.180069	-3.12286
KLHL22	-0.451052	10.4764	-2.51251	0.0162221	0.180069	-3.12345
ARF6	0.481184	8.177	2.51237	0.0162276	0.180069	-3.12373
OR6C70	-0.112837	7.43378	-2.51205	0.0162403	0.180092	-3.12439
UGT1A10	-0.129559	7.34883	-2.51183	0.016249	0.180092	-3.12483
CYP21A2	-0.13098	7.76932	-2.50991	0.016325	0.180589	-3.12871
DNAJB1	-0.414371	9.92843	-2.5099	0.0163251	0.180589	-3.12872
LRRC49	-0.131395	7.54076	-2.50988	0.016326	0.180589	-3.12876
TYRO3	-0.102138	7.56635	-2.50944	0.0163434	0.180589	-3.12965
IBRDC2	-0.469067	10.4782	-2.50924	0.0163513	0.180589	-3.13005
LSM5	0.880254	8.81525	2.50859	0.0163773	0.180589	-3.13137
C19orf25	-0.365735	8.89807	-2.50852	0.0163802	0.180589	-3.13152
SERPINE1	-0.136001	7.62872	-2.50849	0.0163813	0.180589	-3.13158
MRPS12	-0.400853	8.7447	-2.50837	0.016386	0.180589	-3.13181
CHRDL1	-0.106966	7.48592	-2.50825	0.0163908	0.180589	-3.13206
TBL1Y	-0.119845	7.65006	-2.50597	0.0164818	0.181455	-3.13666
KNTC1	-0.356342	8.4413	-2.50579	0.0164889	0.181455	-3.13702
CDC37L1	0.317879	7.97704	2.50419	0.016553	0.182054	-3.14025
OR2T12	-0.124203	7.4578	-2.50253	0.0166199	0.18241	-3.1436
ZNF285A	-0.216534	7.98988	-2.5022	0.0166334	0.18241	-3.14427
FCAMR	-0.10864	7.55389	-2.50219	0.0166335	0.18241	-3.14428
C12orf42	-0.138058	7.43005	-2.50202	0.0166405	0.18241	-3.14463
SURB7	0.523254	8.26484	2.50201	0.0166407	0.18241	-3.14464
OR10A5	-0.132289	7.37945	-2.50193	0.0166441	0.18241	-3.14481
PCDHB9	1.07814	10.9088	2.50111	0.0166772	0.182664	-3.14646
CCT2	-0.476865	10.0104	-2.50084	0.0166883	0.182679	-3.14701
SPRR2C	-0.116607	7.44847	-2.50022	0.0167135	0.182847	-3.14827
SYNGR3	-0.121518	7.54567	-2.49951	0.0167422	0.183003	-3.14969
TMEM27	-0.127922	7.60098	-2.4993	0.0167507	0.183003	-3.15011
ATR	-0.119331	7.58779	-2.49914	0.0167572	0.183003	-3.15044
BRF2	-0.306262	9.41569	-2.4988	0.0167709	0.183045	-3.15112
HPS5	-0.136885	7.66226	-2.49814	0.0167979	0.183233	-3.15245
ADAMTSL5	-0.126653	7.84078	-2.49785	0.0168096	0.183253	-3.15303
GPR179	-0.1273	7.95928	-2.49689	0.0168486	0.183419	-3.15496
FAM79A	-0.339449	12.0308	-2.49682	0.0168516	0.183419	-3.15511
C1orf115	-0.253191	8.05456	-2.49622	0.016876	0.183419	-3.15631
ANTXR1	-0.109291	7.88248	-2.4961	0.016881	0.183419	-3.15656
GPRC6A	-0.136263	7.86946	-2.49609	0.0168813	0.183419	-3.15657
C3orf42	-0.135503	7.7235	-2.49603	0.0168839	0.183419	-3.1567
FAM63B	0.564555	8.45947	2.49525	0.0169157	0.183565	-3.15826
AMY2B	0.796256	9.16795	2.49518	0.0169185	0.183565	-3.1584
ST8SIA6	-0.123335	7.6865	-2.49495	0.0169281	0.183565	-3.15887
RETNLB	-0.110442	7.64642	-2.49474	0.0169367	0.183565	-3.15929
ACF	-0.134423	7.68227	-2.49428	0.0169557	0.183612	-3.16022
DKFZp434K1815	-0.450918	9.87239	-2.49387	0.0169723	0.183612	-3.16104
DIRAS3	-0.131704	7.75666	-2.49379	0.0169758	0.183612	-3.1612
EEF1D	-0.117052	7.4956	-2.49367	0.0169805	0.183612	-3.16144
SPDEF	-0.134927	7.55263	-2.49285	0.0170145	0.183873	-3.1631
C6orf174	-0.12438	7.58277	-2.49166	0.0170634	0.183894	-3.16548
STARD5	-0.111972	7.49318	-2.49162	0.017065	0.183894	-3.16556
RAB9B	-0.132998	7.70252	-2.49128	0.0170792	0.183894	-3.16625
GTF2IRD1	-0.116911	7.76074	-2.49126	0.0170802	0.183894	-3.1663
Rgr	-0.459271	10.8963	-2.4912	0.0170824	0.183894	-3.16641
RIPK2	-0.451877	9.97446	-2.49108	0.0170876	0.183894	-3.16666
FXN	-0.187748	7.70635	-2.49093	0.0170935	0.183894	-3.16695
XYLT1	-0.143513	7.75648	-2.49089	0.0170954	0.183894	-3.16704
YSK4	-0.116301	7.49046	-2.49048	0.0171124	0.18397	-3.16786
AP3S2	-0.21363	8.50115	-2.48985	0.0171382	0.184076	-3.16912
RPL14	1.10365	10.8325	2.48976	0.0171422	0.184076	-3.16931
TIGD6	-0.157739	7.94325	-2.48947	0.017154	0.184076	-3.16988
ARPC1A	-0.421181	9.84991	-2.48929	0.0171617	0.184076	-3.17025
HEXIM2	-0.212328	7.97719	-2.48793	0.0172182	0.184531	-3.17298
HSD11B1L	-0.152582	7.95411	-2.487	0.0172569	0.184531	-3.17485
GSTO2	-0.196954	7.93685	-2.48684	0.0172635	0.184531	-3.17516
CD8B	-0.410012	8.19671	-2.48679	0.0172655	0.184531	-3.17526
DNAJC5B	-0.143303	7.4413	-2.48656	0.0172754	0.184531	-3.17574
OSTF1	-0.410318	13.0213	-2.48618	0.0172914	0.184531	-3.1765
KIAA1324L	-0.278981	7.84347	-2.48612	0.0172937	0.184531	-3.17662
POLR2F	-0.454655	11.035	-2.48593	0.0173017	0.184531	-3.177
LOC285016	-0.165191	7.85823	-2.48579	0.0173074	0.184531	-3.17727
LZTS2	-0.133472	7.79521	-2.48505	0.0173386	0.184531	-3.17877
KLKB1	-0.191424	7.88597	-2.48478	0.0173499	0.184531	-3.17931
RASGEF1C	-0.13768	7.594	-2.48435	0.0173679	0.184531	-3.18017
MAPK14	-0.15242	7.84061	-2.48423	0.017373	0.184531	-3.18042
C21orf29	-0.0979932	7.51131	-2.48419	0.0173744	0.184531	-3.18048
DHRS9	-0.293188	8.04679	-2.48411	0.017378	0.184531	-3.18066
TNFRSF9	-0.279185	8.30866	-2.48391	0.0173863	0.184531	-3.18105
BAALC	-0.149835	7.75935	-2.48386	0.0173882	0.184531	-3.18114
TEX9	-0.11383	7.57736	-2.48353	0.0174024	0.184531	-3.18182
FAM98C	-0.256531	8.51354	-2.48348	0.0174046	0.184531	-3.18192
SLC25A32	0.409133	7.90464	2.4831	0.0174204	0.184531	-3.18268
GYLTL1B	-0.133282	7.61442	-2.48295	0.0174265	0.184531	-3.18297
ZADH1	1.17408	10.4462	2.48284	0.0174315	0.184531	-3.1832
C17orf39	0.416476	8.51488	2.48283	0.0174319	0.184531	-3.18323
KLRC3	-0.126649	7.49935	-2.48181	0.0174746	0.184714	-3.18525
CACNB4	-0.175778	7.80679	-2.48172	0.0174783	0.184714	-3.18543
ASTL	-0.127915	7.79388	-2.48151	0.0174874	0.184714	-3.18586
HISPPD2A	-0.115265	7.61277	-2.48136	0.0174938	0.184714	-3.18617
ECRG4	-0.176235	7.65477	-2.4812	0.0175004	0.184714	-3.18648
OR52A4	-0.107274	7.54218	-2.481	0.017509	0.184714	-3.18689
UPF2	-0.147312	7.73526	-2.48077	0.0175187	0.184714	-3.18735
TNFSF9	-0.154468	7.94369	-2.48025	0.0175405	0.18484	-3.18838
TMLHE	-0.258432	8.56145	-2.47985	0.0175576	0.184847	-3.18919
EP400NL	-0.138525	7.58269	-2.47977	0.017561	0.184847	-3.18935
CDKL1	-0.228472	8.14115	-2.47942	0.0175757	0.184897	-3.19004
ONECUT3	-0.107573	7.40372	-2.47908	0.0175904	0.184948	-3.19074
PI4KII	-0.196836	8.09168	-2.4787	0.0176063	0.18501	-3.19149
KNS2	-0.234912	8.10669	-2.47765	0.0176511	0.185017	-3.1936
RASGRF2	-0.128632	7.57711	-2.47754	0.0176557	0.185017	-3.19381
UBL5	-0.231873	8.56538	-2.47696	0.0176804	0.185017	-3.19497
CYSLTR1	-0.415516	9.84267	-2.47685	0.0176851	0.185017	-3.19519
TRAF3	-0.230216	8.08019	-2.47682	0.0176866	0.185017	-3.19527
SSX3	-0.160367	7.84436	-2.47615	0.0177151	0.185017	-3.1966
TRIM52	-0.453141	9.16599	-2.47601	0.0177211	0.185017	-3.19688
TXNL4A	-0.183097	8.10411	-2.47583	0.0177289	0.185017	-3.19725
LOC129530	-0.22418	8.1539	-2.47567	0.0177357	0.185017	-3.19757
PTGES3	0.868424	11.1608	2.47564	0.0177368	0.185017	-3.19762
IRS4	-0.130358	7.8804	-2.47554	0.0177413	0.185017	-3.19783
MYBPC3	-0.451495	9.45553	-2.47538	0.0177478	0.185017	-3.19813
AK3	-0.442425	9.96867	-2.47524	0.0177539	0.185017	-3.19842
PCID1	0.968125	10.8784	2.47513	0.0177588	0.185017	-3.19865
C1orf83	-0.354475	8.90953	-2.47506	0.0177617	0.185017	-3.19878
MVP	-0.401367	11.6296	-2.47479	0.0177731	0.185017	-3.19931
LOXL1	-0.120934	7.34627	-2.47473	0.0177758	0.185017	-3.19944
PCDHGA6	-0.112666	7.61903	-2.47444	0.0177882	0.185043	-3.20002
HIST1H2BD	-0.478987	10.3749	-2.47378	0.0178166	0.185095	-3.20134
UBASH3A	-0.109617	7.55911	-2.47375	0.0178177	0.185095	-3.20139
SORD	0.541151	8.395	2.47363	0.017823	0.185095	-3.20164
AMY2A	-0.147355	7.72888	-2.4733	0.0178373	0.185103	-3.20231
GPR157	-0.105034	7.44583	-2.47315	0.0178436	0.185103	-3.2026
PFKFB4	-0.491067	12.3616	-2.47288	0.0178554	0.185111	-3.20315
SIRT5	-0.427982	8.90464	-2.47267	0.0178643	0.185111	-3.20356
C1orf61	-0.151684	7.55717	-2.4715	0.0179146	0.185362	-3.2059
FLJ35119	-0.436324	8.95732	-2.47144	0.0179172	0.185362	-3.20601
C7orf33	-0.122853	7.48253	-2.47142	0.0179183	0.185362	-3.20607
HSPB1	0.508675	11.0317	2.47112	0.0179312	0.185391	-3.20666
ASB6	-0.11492	7.45697	-2.47004	0.0179778	0.18562	-3.20881
FLJ31413	-0.393671	11.2925	-2.46991	0.0179837	0.18562	-3.20909
TLR8	-0.496068	11.8993	-2.46987	0.0179855	0.18562	-3.20917
KRTAP6-2	-0.100672	7.52664	-2.46943	0.0180044	0.18562	-3.21004
CCDC27	-0.13463	7.7866	-2.46906	0.0180202	0.18562	-3.21077
C19orf20	-0.247207	7.77191	-2.46877	0.018033	0.18562	-3.21136
FABP6	-0.124024	7.539	-2.46838	0.01805	0.18562	-3.21214
ITLN2	-0.125431	7.65263	-2.46822	0.0180569	0.18562	-3.21245
LOC375748	-0.170488	7.73027	-2.46806	0.0180637	0.18562	-3.21277
LASS5	-0.402013	9.8667	-2.46761	0.0180833	0.18562	-3.21366
GRIP1	-0.128403	7.4706	-2.46748	0.0180893	0.18562	-3.21394
UCRC	-0.306123	8.63009	-2.46735	0.0180947	0.18562	-3.21419
BAI3	-0.100625	7.44209	-2.46726	0.0180988	0.18562	-3.21438
C11orf63	-0.12072	7.61638	-2.46721	0.0181008	0.18562	-3.21447
S100A13	-0.117061	7.70678	-2.46682	0.018118	0.18562	-3.21526
PRKD1	-0.11797	7.38623	-2.46667	0.0181242	0.18562	-3.21554
PARVB	-0.207373	8.17044	-2.46637	0.0181375	0.18562	-3.21615
C6orf81	-0.150067	7.68948	-2.46611	0.0181488	0.18562	-3.21667
CCR6	-0.124021	7.62343	-2.46585	0.0181604	0.18562	-3.2172
CUZD1	-0.1773	7.77257	-2.46574	0.018165	0.18562	-3.2174
WNT5A	-0.115815	7.49614	-2.46554	0.0181736	0.18562	-3.2178
SLC2A11	0.862424	9.62553	2.46516	0.0181902	0.18562	-3.21856
KIAA1967	-0.199814	7.90796	-2.4651	0.0181931	0.18562	-3.21869
C11orf48	-0.368907	10.2224	-2.46497	0.0181988	0.18562	-3.21895
MEG3	-0.117698	7.61365	-2.46489	0.0182024	0.18562	-3.21911
TMOD3	-0.278529	8.4242	-2.464	0.0182413	0.185838	-3.22088
SLC32A1	-0.130065	7.37308	-2.46395	0.0182436	0.185838	-3.22099
FAM18B2	-0.129949	7.79053	-2.46348	0.018264	0.185943	-3.22191
PALMD	-0.128763	7.76186	-2.46305	0.0182828	0.186002	-3.22277
TAF9	0.562762	8.42871	2.4625	0.0183072	0.186002	-3.22387
MYOM1	-0.33253	8.57744	-2.46246	0.0183089	0.186002	-3.22395
METT10D	-0.212835	8.41915	-2.46228	0.0183169	0.186002	-3.22431
GHR	-0.123615	7.38425	-2.46222	0.0183197	0.186002	-3.22444
ZNF473	-0.131176	7.76075	-2.46188	0.0183346	0.186009	-3.22511
C11orf38	0.671542	9.51457	2.4617	0.0183425	0.186009	-3.22547
FLJ25801	-0.108339	7.57173	-2.46152	0.0183503	0.186009	-3.22582
TTR	-0.13257	7.83331	-2.46101	0.018373	0.186089	-3.22684
AMZ2	-0.480456	11.0731	-2.46089	0.0183782	0.186089	-3.22708
OPHN1	-0.125815	7.5251	-2.46004	0.0184158	0.1863	-3.22878
PRIC285	-0.582188	11.3969	-2.45997	0.0184191	0.1863	-3.22892
HIST1H1T	-0.176335	7.76527	-2.45885	0.0184684	0.186668	-3.23114
PRSS27	-0.134154	7.63531	-2.45869	0.0184754	0.186668	-3.23145
GPR3	-0.128001	7.70441	-2.45799	0.0185067	0.186701	-3.23285
SPATA2	-0.268182	8.34132	-2.45761	0.0185238	0.186701	-3.23362
LOC441931	-0.115918	7.58668	-2.45749	0.0185291	0.186701	-3.23386
FLJ38973	0.437556	7.94316	2.4573	0.0185373	0.186701	-3.23422
RIC3	-0.154747	7.5787	-2.45698	0.0185518	0.186701	-3.23487
SUMO1P3	0.428483	7.83544	2.45677	0.0185609	0.186701	-3.23528
EPHA1	-0.34012	8.19891	-2.45664	0.0185667	0.186701	-3.23554
TCF23	-0.143859	7.65289	-2.45649	0.0185734	0.186701	-3.23584
LIMS1	-0.307378	9.42761	-2.45613	0.0185895	0.186701	-3.23655
RSHL1	-0.11428	7.53669	-2.45588	0.0186006	0.186701	-3.23705
ATAD3B	-0.118265	7.72816	-2.45584	0.0186024	0.186701	-3.23713
EIF3S10	0.773503	10.4891	2.4558	0.0186045	0.186701	-3.23722
WDR7	-0.110304	7.61625	-2.45493	0.0186433	0.186701	-3.23895
CNGA3	-0.107837	7.49278	-2.45409	0.018681	0.186701	-3.24062
ZFP37	-0.207493	7.8278	-2.45365	0.0187005	0.186701	-3.24149
ISG15	-0.81124	9.78732	-2.45355	0.018705	0.186701	-3.24169
PNPLA8	0.647253	8.95147	2.45347	0.0187088	0.186701	-3.24186
PPM1G	-0.167406	7.6101	-2.45339	0.0187124	0.186701	-3.24201
LOC283871	-0.202632	8.04788	-2.45307	0.0187266	0.186701	-3.24264
B3GNT5	0.591033	8.48867	2.45255	0.0187501	0.186701	-3.24368
MED19	-0.371433	9.16422	-2.4525	0.0187524	0.186701	-3.24379
PRAMEF1	-0.101143	7.46291	-2.45201	0.0187744	0.186701	-3.24475
WDR51B	0.466304	9.36243	2.45194	0.0187774	0.186701	-3.24489
LOC126295	0.434245	8.17954	2.45191	0.0187787	0.186701	-3.24495
MYOT	-0.0898053	7.65888	-2.4516	0.0187931	0.186701	-3.24558
COL11A1	-0.129605	7.82018	-2.45135	0.018804	0.186701	-3.24606
C3orf37	-0.130668	7.62067	-2.45132	0.0188054	0.186701	-3.24612
SCARA3	-0.11663	7.50559	-2.45112	0.0188145	0.186701	-3.24652
HCP1	-0.122878	7.69781	-2.45102	0.018819	0.186701	-3.24672
HIST2H2AB	0.258661	8.07133	2.451	0.01882	0.186701	-3.24676
OR5C1	-0.148802	7.60605	-2.45096	0.0188219	0.186701	-3.24685
TTC15	-0.39682	10.3092	-2.45092	0.0188237	0.186701	-3.24693
ING3	0.485579	8.17032	2.45088	0.0188252	0.186701	-3.24699
TITF1	-0.0994102	7.55065	-2.45084	0.0188272	0.186701	-3.24708
TMEM55B	-0.360595	9.7307	-2.44992	0.0188689	0.186701	-3.24891
PBX3	-0.365168	9.81345	-2.44983	0.0188726	0.186701	-3.24908
UMOD	-0.116651	7.83241	-2.4494	0.0188922	0.186701	-3.24994
AKTIP	-0.545926	10.3829	-2.44937	0.0188936	0.186701	-3.25
UNQ6411	-0.133352	7.63566	-2.44926	0.0188987	0.186701	-3.25022
SKIV2L	-0.360625	9.83925	-2.44914	0.0189041	0.186701	-3.25046
MIOX	-0.121683	7.55473	-2.44911	0.0189056	0.186701	-3.25052
TCBA1	-0.12437	7.54969	-2.44893	0.0189135	0.186701	-3.25087
OR3A3	-0.11587	7.47157	-2.44884	0.0189176	0.186701	-3.25105
KIAA1219	-0.328329	8.89581	-2.44796	0.0189577	0.186701	-3.2528
CCDC3	-0.113081	7.5944	-2.44788	0.0189614	0.186701	-3.25296
STX17	-0.177893	7.71943	-2.44787	0.0189616	0.186701	-3.25297
PDE7A	-0.4803	10.6695	-2.44754	0.0189768	0.186701	-3.25364
SYT12	-0.124141	7.71221	-2.44749	0.0189791	0.186701	-3.25374
MPP6	-0.235757	7.85162	-2.44736	0.018985	0.186701	-3.25399
TMEM46	-0.1227	7.52768	-2.44713	0.0189956	0.186701	-3.25446
TRHDE	-0.115772	7.5463	-2.44697	0.0190028	0.186701	-3.25477
FLJ46210	-0.112402	7.58332	-2.44694	0.019004	0.186701	-3.25482
RLN1	-0.169939	7.61723	-2.44681	0.0190098	0.186701	-3.25508
ZNF161	-0.421316	11.8076	-2.4458	0.0190561	0.186886	-3.25709
PCNX	-0.491879	11.649	-2.44561	0.0190647	0.186886	-3.25746
NAP1L1	0.66217	9.40426	2.44556	0.0190669	0.186886	-3.25756
TDGF1	-0.106213	7.62132	-2.44552	0.0190688	0.186886	-3.25764
MCTS1	0.864548	9.57448	2.44488	0.0190979	0.187073	-3.25891
CGB1	-0.119727	7.69119	-2.44443	0.0191188	0.187104	-3.25981
HES4	-0.712123	9.74723	-2.44434	0.019123	0.187104	-3.25999
LAMC2	-0.118842	7.7156	-2.44416	0.0191312	0.187104	-3.26035
KIAA0774	-0.125922	7.48977	-2.44388	0.019144	0.187104	-3.2609
KCNS3	-0.104328	7.51476	-2.44372	0.0191512	0.187104	-3.26121
ISCU	-0.311796	12.2612	-2.44054	0.0192976	0.188435	-3.26752
FGF5	-0.116118	7.66826	-2.44026	0.0193106	0.188463	-3.26807
ECM1	-0.107672	7.69759	-2.43959	0.0193415	0.18851	-3.2694
DNA2L	-0.173322	8.1035	-2.43959	0.0193416	0.18851	-3.2694
FTMT	-0.111095	7.50222	-2.43947	0.0193472	0.18851	-3.26964
BCAS2	0.584725	8.13554	2.43928	0.0193559	0.18851	-3.27002
GGT6	-0.117911	7.66077	-2.43899	0.0193691	0.18854	-3.27058
EXPH5	-0.198294	7.80176	-2.43818	0.0194071	0.18871	-3.2722
PTPDC1	-0.180022	7.85819	-2.43775	0.0194269	0.18871	-3.27305
C9orf71	-0.122576	7.61952	-2.43762	0.0194329	0.18871	-3.2733
CCRN4L	-0.181901	7.88673	-2.43759	0.0194341	0.18871	-3.27335
STEAP1	-0.115943	7.47141	-2.43753	0.0194372	0.18871	-3.27348
ANKS3	-0.128256	7.60313	-2.43666	0.0194777	0.188825	-3.27521
IL22	-0.122542	7.56742	-2.43663	0.019479	0.188825	-3.27526
SMARCA5	0.625823	8.95098	2.43631	0.0194939	0.188825	-3.2759
P2RY8	-0.467166	11.1827	-2.43624	0.019497	0.188825	-3.27603
SLC22A13	-0.108222	7.67321	-2.4361	0.0195038	0.188825	-3.27631
PGGT1B	-0.223126	8.45742	-2.43597	0.0195098	0.188825	-3.27657
CYP2A6	-0.112926	7.54366	-2.43573	0.0195208	0.188833	-3.27704
ANKRD33	0.556819	10.1811	2.43506	0.0195521	0.188969	-3.27836
C1orf144	-0.337799	10.577	-2.435	0.0195552	0.188969	-3.27849
AQP12A	0.408638	8.39127	2.43348	0.0196262	0.189418	-3.28149
PLAUR	-0.377862	9.98287	-2.43339	0.0196302	0.189418	-3.28166
SUSD4	-0.127796	7.50634	-2.43296	0.0196506	0.189418	-3.28252
FLG	-0.125998	7.41911	-2.43265	0.0196652	0.189418	-3.28313
PLEKHG6	-0.118392	7.60888	-2.4325	0.0196724	0.189418	-3.28343
RGS3	-0.125247	7.80556	-2.43219	0.0196866	0.189418	-3.28403
MRPL3	0.502302	8.14216	2.43096	0.0197447	0.189418	-3.28647
C14orf162	-0.116578	7.72697	-2.43072	0.0197558	0.189418	-3.28694
GDF2	-0.110243	7.57623	-2.43058	0.0197627	0.189418	-3.28722
HLA-DPB2	-0.135913	7.51915	-2.4302	0.0197804	0.189418	-3.28797
ADAM10	0.461067	8.19632	2.43017	0.0197819	0.189418	-3.28803
GNAL	-0.133323	7.66514	-2.42944	0.0198167	0.189418	-3.28948
PCDH9	-0.12813	7.49024	-2.42932	0.0198221	0.189418	-3.2897
CYB5D1	-0.264725	8.49205	-2.4289	0.0198422	0.189418	-3.29054
MTL5	-0.139445	7.69737	-2.42875	0.0198491	0.189418	-3.29083
RPGRIP1	-0.349544	8.83674	-2.42842	0.0198647	0.189418	-3.29148
ZNF257	-0.117886	7.54115	-2.42836	0.0198676	0.189418	-3.2916
ZP4	-0.105032	7.37992	-2.42807	0.0198814	0.189418	-3.29218
LOC441476	0.167948	7.83222	2.42789	0.0198898	0.189418	-3.29253
C3	-0.122455	7.80375	-2.42789	0.01989	0.189418	-3.29253
NOLA3	-0.370766	13.4859	-2.4278	0.019894	0.189418	-3.2927
CLCA3	-0.103725	7.57041	-2.42751	0.0199079	0.189418	-3.29328
SLC25A15	-0.196469	7.82476	-2.42743	0.0199119	0.189418	-3.29344
AFMID	0.37819	8.47152	2.42725	0.0199204	0.189418	-3.2938
HLA-DRB3	0.714126	10.5309	2.42713	0.0199259	0.189418	-3.29403
MPZL1	-0.226517	7.98417	-2.42653	0.0199547	0.189418	-3.29522
FLJ42280	-0.134542	7.54124	-2.42649	0.0199565	0.189418	-3.29529
GTF2B	-0.373441	10.3373	-2.42613	0.0199739	0.189418	-3.29601
B3GNT6	-0.222259	7.86995	-2.4258	0.0199892	0.189418	-3.29665
LAPTM4A	0.509062	9.0434	2.42577	0.0199909	0.189418	-3.29672
C14orf118	-0.168417	8.04845	-2.42575	0.0199919	0.189418	-3.29676
PCDHGA11	-0.104079	7.50789	-2.42565	0.0199963	0.189418	-3.29694
DAOA	-0.111446	7.57668	-2.42538	0.0200096	0.189418	-3.29749
P4HA3	-0.121318	7.6658	-2.42528	0.0200142	0.189418	-3.29768
ARSK	-0.19091	7.94858	-2.42512	0.020022	0.189418	-3.298
DDX56	-0.411121	9.70298	-2.42476	0.0200391	0.189418	-3.29871
TBC1D5	-0.188275	8.00028	-2.42455	0.020049	0.189418	-3.29912
FLJ46010	-0.115627	7.55736	-2.42448	0.0200522	0.189418	-3.29925
FLJ10922	-0.191406	7.74167	-2.42444	0.0200543	0.189418	-3.29934
LOC649446	-0.157881	7.65847	-2.42429	0.0200617	0.189418	-3.29964
MKRN3	-0.196491	7.8527	-2.42428	0.0200622	0.189418	-3.29966
C12orf4	-0.312997	8.42025	-2.42427	0.0200627	0.189418	-3.29968
C11orf31	-0.27381	8.21969	-2.42426	0.0200628	0.189418	-3.29969
HNRNPG-T	-0.131674	7.5165	-2.42415	0.0200682	0.189418	-3.29991
PDE3B	-0.447796	9.02699	-2.42405	0.0200728	0.189418	-3.3001
C3orf10	-0.469219	10.5054	-2.42382	0.020084	0.189418	-3.30056
NBN	-0.134957	7.68929	-2.42371	0.0200891	0.189418	-3.30077
CDK3	-0.164884	7.86964	-2.42362	0.0200935	0.189418	-3.30095
OVOS2	-0.121886	7.48845	-2.42343	0.0201025	0.189418	-3.30132
TMOD4	-0.169111	8.11922	-2.42328	0.0201099	0.189418	-3.30163
HIST1H2AD	0.409305	7.98815	2.4224	0.0201521	0.189668	-3.30336
RPH3A	-0.199675	7.8938	-2.4223	0.0201569	0.189668	-3.30356
RIBC2	-0.108911	7.55448	-2.42201	0.0201707	0.189702	-3.30412
CHRNA7	-0.113602	7.66045	-2.42148	0.0201963	0.189816	-3.30517
STON1	-0.127436	7.57131	-2.42128	0.0202061	0.189816	-3.30557
GBP3	0.528124	8.44494	2.42113	0.0202134	0.189816	-3.30587
SENP6	0.41168	8.0071	2.42078	0.0202303	0.189824	-3.30656
WDR44	0.420319	8.22153	2.42069	0.0202346	0.189824	-3.30674
RPL12	-0.424345	14.7309	-2.42023	0.0202567	0.189936	-3.30764
ARID3C	-0.100897	7.68873	-2.41979	0.020278	0.190015	-3.30851
ZNF564	-0.37431	9.34884	-2.41947	0.0202935	0.190015	-3.30914
TNRC5	-0.438343	10.7776	-2.41942	0.0202958	0.190015	-3.30923
hCAP-D3	-0.194496	8.02081	-2.4186	0.0203352	0.190239	-3.31084
GUCA1C	-0.15217	8.0953	-2.41843	0.0203436	0.190239	-3.31118
TTLL6	-0.0971019	7.6059	-2.41813	0.020358	0.190239	-3.31176
C19orf18	-0.131786	7.56651	-2.41808	0.0203605	0.190239	-3.31186
HTRA4	-0.164801	7.9642	-2.41767	0.0203807	0.190295	-3.31268
C8orf53	0.55522	8.36678	2.41746	0.0203909	0.190295	-3.3131
RFK	0.506537	8.15029	2.41733	0.0203972	0.190295	-3.31335
LOC440799	-0.123209	7.63038	-2.41692	0.0204167	0.190382	-3.31414
[truncated: 16,633 more rows]
